# Supplementary material for: Transcriptome Profiling of Petal Abscission Zone and Functional Analysis of an Aux/IAA Family Gene RhIAA16 Involved in Petal Shedding in Rose
Source: Front Plant Sci. 2016 Sep 15;7:1375. doi: 10.3389/fpls.2016.01375 (PMC5023668; doi:10.3389/fpls.2016.01375)
Supplement: TABLE S3 — Differentially transcribed genes. [file Table_3.XLSX]

## Sheet: Differentially transcried genes
Supplemental Table 3 Differentially transcribed genes
GeneID	annotation	GM1 vs GM3			GM5 vs GM3
		mean	mean	ratio	mean	mean	ratio
RSA00003	Receptor-like protein kinase	1.62	7.79	4.81	7.79	26.18	3.36
RSA00032	Alpha-amylase, putative	44.38	112.95	2.55	112.95	31.45	0.28
RSA00033	Alpha-amylase, putative	17.61	49.79	2.83	49.79	11.25	0.23
RSA00054	Phosphatidylinositol-4-phosphate 5-kinase family protein	14.83	30.51	2.06	30.51	9.04	0.3
RSA00055	Phosphatidylinositol-4-phosphate 5-kinase family protein	15.87	34.44	2.17	34.44	9.55	0.28
RSA00056	Phosphatidylinositol-4-phosphate 5-kinase family protein	14.36	30.69	2.14	30.69	8.59	0.28
RSA00140	Respiratory burst oxidase homolog	9.26	9.4	1.02	9.4	19.06	2.03
RSA00226	4-alpha-glucanotransferase	45.26	45.08	1	45.08	11.42	0.25
RSA00245	Cytochrome P450 family protein	269.43	114.05	0.42	114.05	35.22	0.31
RSA00255	Serine/threonine-protein kinase	36.01	11.31	0.31	11.31	4.21	0.37
RSA00257	Serine/threonine-protein kinase	36.74	11.71	0.32	11.71	4.27	0.36
RSA00342	[pt] ATP-dependent Clp protease ATP-binding subunit ClpB	10.87	23.79	2.19	23.79	9.64	0.41
RSA00486	Urea active transporter-like protein	24.79	26.21	1.06	26.21	58.98	2.25
RSA00499	F-box protein	16.53	21.65	1.31	21.65	8.53	0.39
RSA00500	F-box protein	16.54	21.93	1.33	21.93	8.65	0.39
RSA00502	Trehalose-phosphate phosphatase	11.53	14.59	1.27	14.59	7.06	0.48
RSA00534	Interferon-induced GTP-binding protein mx, putative	16.3	12.71	0.78	12.71	35.42	2.79
RSA00581	Protein LONGIFOLIA 1	18.15	24.55	1.35	24.55	12.08	0.49
RSA00582	Protein LONGIFOLIA 1	18.31	24.74	1.35	24.74	12.2	0.49
RSA00583	Protein LONGIFOLIA 1	18.32	24.61	1.34	24.61	12.14	0.49
RSA00584	Protein LONGIFOLIA 1	18.68	25.1	1.34	25.1	12.44	0.5
RSA00588	Protein LONGIFOLIA 1	18.7	25.29	1.35	25.29	12.45	0.49
RSA00589	Protein LONGIFOLIA 1	18.19	24.68	1.36	24.68	12.1	0.49
RSA00606	Calmodulin-binding protein 60-D	4.51	9.29	2.06	9.29	20.4	2.2
RSA00613	Receptor-like kinase	8.03	9.05	1.13	9.05	22.63	2.5
RSA00618	Unknown protein	23.44	225.92	9.64	225.92	86.87	0.38
RSA00620	Unknown protein	21.1	209.23	9.91	209.23	89.11	0.43
RSA00621	Unknown protein	7.12	37.28	5.24	37.28	15.65	0.42
RSA00789	Serine-rich adhesin for platelets	22.9	251.49	10.98	251.49	91.23	0.36
RSA00873	Wall-associated receptor kinase-like protein	3.62	4.06	1.12	4.06	21.34	5.26
RSA00994	PLATZ transcription factor family protein	0.25	8.78	35.58	8.78	1.21	0.14
RSA01068	Starch synthase II-2	9.92	10.16	1.02	10.16	3.08	0.3
RSA01125	Gibberellin 20-oxidase	0.36	5.48	15.37	5.48	0.3	0.05
RSA01208	Unknown protein	5.93	12.57	2.12	12.57	3.19	0.25
RSA01219	Carboxylesterase 1	1.89	1.45	0.77	1.45	9.27	6.38
RSA01394	Cation channel family protein	28.93	32.5	1.12	32.5	87.25	2.68
RSA01409	Receptor-like protein kinase	0.97	1.25	1.29	1.25	6.16	4.93
RSA01453	Auxin-induced protein 5NG4, putative	28.64	14.67	0.51	14.67	3.93	0.27
RSA01454	Auxin-induced protein 5NG4, putative	25.62	11.88	0.46	11.88	3.61	0.3
RSA01459	Laccase, putative	17.46	14.9	0.85	14.9	5.31	0.36
RSA01543	Cysteine-rich receptor-like protein kinase 42	6.05	6.58	1.09	6.58	25.94	3.94
RSA01557	Pleckstrin homology domain-containing family protein	6.52	27.32	4.19	27.32	13.07	0.48
RSA01590	Cytochrome P450, putative	6.56	6.12	0.93	6.12	16.86	2.76
RSA01654	DDB1-and CUL4-associated factor	5.09	5.13	1.01	5.13	12.58	2.45
RSA01680	Transducin family protein	5.02	7.42	1.48	7.42	2.51	0.34
RSA01720	Leucine-rich repeat receptor-like protein kinase	20.31	5.76	0.28	5.76	18.34	3.19
RSA01761	Hydrolase family protein	0.2	2.98	14.88	2.98	22.53	7.57
RSA01905	Adipocyte plasma membrane-associated protein, putative	7.66	23.27	3.04	23.27	10.46	0.45
RSA01920	Glycine/D-amino acid oxidases-like	6.53	6	0.92	6	0.85	0.14
RSA01925	Laccase-15	0.57	7.86	13.79	7.86	63.86	8.12
RSA01947	Unknown protein	28.75	37.48	1.3	37.48	17.19	0.46
RSA01957	Proline rich protein	3191.62	2446.36	0.77	2446.36	5414.04	2.21
RSA01958	36.4 kDa proline-rich protein	4115.24	3084.18	0.75	3084.18	6887.56	2.23
RSA01988	Ring finger protein, putative	2.38	3.52	1.48	3.52	15.75	4.47
RSA02010	Cyclin family protein	2.17	2.75	1.27	2.75	13.76	5
RSA02135	Thylakoid lumenal family protein	33.38	43.37	1.3	43.37	13.74	0.32
RSA02184	KDEL motif-containing protein 1, putative	3.88	5.22	1.34	5.22	20.02	3.84
RSA02235	Maf-like protein	7.4	7.46	1.01	7.46	1.87	0.25
RSA02236	Cytochrome c biogenesis protein	8.25	11.2	1.36	11.2	4.01	0.36
RSA02274	Putativ eribonuclease P	19.79	22.33	1.13	22.33	4.62	0.21
RSA02283	Cyclopropane-fatty-acyl-phospholipid synthase family protein	15.21	4.81	0.32	4.81	1.02	0.21
RSA02287	LOB domain protein	24.4	5.14	0.21	5.14	42.41	8.24
RSA02353	CA-responsive protein	3.06	3.61	1.18	3.61	11.47	3.17
RSA02377	Receptor protein kinase-like protein	11.32	8.46	0.75	8.46	19.31	2.28
RSA02538	Glycine-rich cell wall structural protein 1.8	14.36	20.16	1.4	20.16	207.12	10.27
RSA02557	A_IG002N01.13 protein	1.78	2.31	1.3	2.31	8.38	3.63
RSA02570	Polyphenol oxidase IV	153.37	49.73	0.32	49.73	6.37	0.13
RSA02645	Cytochrome P450 family protein, expressed	3.18	4.18	1.31	4.18	13.02	3.12
RSA02646	Cytochrome P450 family protein, expressed	4.94	6.47	1.31	6.47	30.13	4.66
RSA02665	Leaf senescence protein-like	5.36	5.43	1.01	5.43	20.8	3.83
RSA02722	Mta/sah nucleosidase, putative	3.5	4.5	1.29	4.5	30.44	6.77
RSA02748	Unknown protein	1.29	17.35	13.49	17.35	0.15	0.01
RSA02767	Single-stranded DNA-binding protein	3.52	4.06	1.15	4.06	11.53	2.84
RSA02823	Unknown protein	14.15	92.37	6.53	92.37	39.26	0.43
RSA02825	GRF1-INTERACTING FACTOR 1 family protein	17.57	4.97	0.28	4.97	62.27	12.53
RSA02863	Receptor-like protein kinase	19.08	24.18	1.27	24.18	6.47	0.27
RSA02874	Ferredoxin-fold anticodon-binding domain-containing protein 1 homolog	11.7	11.77	1.01	11.77	24.79	2.11
RSA02893	Metal tolerance protein 4	27.05	23.14	0.86	23.14	11.6	0.5
RSA02894	Metal tolerance protein 4	34.11	28.58	0.84	28.58	13.98	0.49
RSA02895	Metal tolerance protein 4	28.41	25.19	0.89	25.19	12.09	0.48
RSA02921	Auxin efflux carrier family protein	30.53	13.13	0.43	13.13	2.53	0.19
RSA02927	17.5 kDa class II heat shock protein	27.95	75.18	2.69	75.18	14.33	0.19
RSA03014	Sugar transporter, putative	4.07	4.53	1.11	4.53	17.1	3.77
RSA03018	At2g17710/T17A5.17	102.32	130.81	1.28	130.81	34.51	0.26
RSA03024	Unknown protein	15.05	11.94	0.79	11.94	5.14	0.43
RSA03166	Receptor-like protein kinase 1-like	4.77	4.67	0.98	4.67	17.98	3.85
RSA03169	MLO-like protein	4.66	6.19	1.33	6.19	18.97	3.07
RSA03170	MLO-like protein	4.41	6.03	1.37	6.03	18.51	3.07
RSA03209	Serine/threonine-protein kinase	1.25	1.3	1.04	1.3	12.32	9.5
RSA03228	Unknown protein	0.55	6.91	12.63	6.91	19.47	2.82
RSA03229	Unknown protein	0.6	9.48	15.81	9.48	24.39	2.57
RSA03230	Unknown protein	0.58	7.28	12.49	7.28	20.04	2.75
RSA03234	Unknown protein	0.53	6.45	12.16	6.45	18.14	2.81
RSA03298	Kinesin-like protein	18.32	13.89	0.76	13.89	4.2	0.3
RSA03318	Serine carboxypeptidase, putative	4.58	12.52	2.73	12.52	28.16	2.25
RSA03348	Pre-rRNA-processing protein TSR1-like protein	14.78	11.55	0.78	11.55	24.11	2.09
RSA03349	Pre-rRNA-processing protein TSR1-like protein	15.78	11.96	0.76	11.96	25.12	2.1
RSA03365	WRKY transcription factor, putative	0.81	7.68	9.52	7.68	29.21	3.8
RSA03424	Lectin-like receptor kinase 7 family protein	11.05	15.4	1.39	15.4	33.64	2.19
RSA03469	Auxin efflux carrier family protein	17.66	32.95	1.87	32.95	76.18	2.31
RSA03482	ABC transporter family protein	4.66	6.89	1.48	6.89	2.84	0.41
RSA03545	Pectinesterase	3.03	23.32	7.71	23.32	0.41	0.02
RSA03594	Calmodulin-like protein 5	0.48	0.62	1.3	0.62	9.21	14.77
RSA03654	Disease resistance protein	6.94	9.59	1.38	9.59	22.8	2.38
RSA03664	ACT domain-containing family protein	4.29	10.01	2.33	10.01	4.9	0.49
RSA03709	Phytoalexin-deficient 4-2 protein	15.15	13.65	0.9	13.65	40.68	2.98
RSA03733	Respiratory burst oxidase, putative	4.24	5.94	1.4	5.94	14.27	2.4
RSA03747	Unknown protein	67.64	17.19	0.25	17.19	8.25	0.48
RSA03772	Peptidase, trypsin-like serine and cysteine proteases	10.76	11.44	1.06	11.44	28.6	2.5
RSA03786	Unknown protein	5.43	55.06	10.13	55.06	5.94	0.11
RSA03823	rRNA biogenesis protein rrp5	5.79	4.49	0.77	4.49	14.28	3.18
RSA03838	Unknown protein	6.68	79.35	11.88	79.35	3.98	0.05
RSA03839	Harpin-induced protein 1 containing protein, expressed	2.59	3.78	1.46	3.78	10.03	2.66
RSA03858	bZIP52	36.94	49.48	1.34	49.48	7.95	0.16
RSA03861	Calcineurin B, putative	11.34	12.61	1.11	12.61	5.68	0.45
RSA03897	WRKY transcription factor 1	2.1	8.82	4.21	8.82	28.45	3.23
RSA03898	Unknown protein	96.04	104.74	1.09	104.74	41.74	0.4
RSA03900	Ferredoxin-thioredoxin reductase, variable chain	171.17	179.56	1.05	179.56	67.68	0.38
RSA03918	Photosystem II reaction center Psb28 protein	22.96	23.63	1.03	23.63	8.87	0.38
RSA03998	Cysteine-rich venom protein	20.69	5.73	0.28	5.73	0.78	0.14
RSA04005	Tubulin beta chain	34.54	16.33	0.47	16.33	5.41	0.33
RSA04010	Aspartic proteinase nepenthesin-2	1.35	1.88	1.39	1.88	10.35	5.51
RSA04069	UDP-glucosyltransferase	3.87	11.68	3.02	11.68	60.35	5.17
RSA04082	Mitochondrial transcription termination factor family protein	9.74	28.45	2.92	28.45	12.71	0.45
RSA04148	Ring finger protein, putative	4.67	11.99	2.57	11.99	55.54	4.63
RSA04195	N-rich protein, putative	49.25	105.43	2.14	105.43	277.77	2.63
RSA04216	Protein ABIL2, putative	32.46	14.36	0.44	14.36	3.52	0.25
RSA04303	Acyl-ACP thioesterase	27.05	33.91	1.25	33.91	14.95	0.44
RSA04304	Acyl-ACP thioesterase	27.63	34.77	1.26	34.77	14.23	0.41
RSA04314	Phosphatidate phosphatase LPIN3	6.89	6.94	1.01	6.94	2.29	0.33
RSA04315	Protein kinase family protein	20.89	6.1	0.29	6.1	1.57	0.26
RSA04316	Protein kinase family protein	20.87	5.85	0.28	5.85	1.62	0.28
RSA04388	Protein seedling plastid development 1	8.04	21.79	2.71	21.79	4.89	0.22
RSA04394	Peptide transporter, putative	7.45	8.51	1.14	8.51	4.24	0.5
RSA04415	Tuftelin interacting protein, putative	8.09	23.31	2.88	23.31	11.33	0.49
RSA04500	Aux/IAA27	33.66	33.19	0.99	33.19	88.58	2.67
RSA04506	Unknown protein	4.67	5.68	1.22	5.68	16.91	2.98
RSA04508	Unknown protein	7.76	9.59	1.24	9.59	28.17	2.94
RSA04510	Unknown protein	5.04	6.56	1.3	6.56	18.25	2.78
RSA04515	Unknown protein	6.55	8.45	1.29	8.45	25.16	2.98
RSA04557	Cyclin B1-1	0	5.91	590.67	5.91	0.52	0.09
RSA04561	Cytochrome P450, putative	0.1	4.33	43.27	4.33	0.43	0.1
RSA04595	Ring finger protein, putative	10.59	9.65	0.91	9.65	2.07	0.21
RSA04713	Unknown protein	1.25	11.69	9.32	11.69	4.14	0.35
RSA04719	GRF1-INTERACTING FACTOR 2 family protein	41.77	32.5	0.78	32.5	69.31	2.13
RSA04720	GRF1-INTERACTING FACTOR 2 family protein	38.76	30.4	0.78	30.4	62.35	2.05
RSA04724	Nitrate transporter, putative	26.91	71.35	2.65	71.35	236.61	3.32
RSA04725	Nitrate transporter, putative	26.35	69.37	2.63	69.37	232.44	3.35
RSA04763	Unknown protein	7.91	16.64	2.1	16.64	4.87	0.29
RSA04766	Epoxide hydrolase, putative	32.13	34.15	1.06	34.15	78.79	2.31
RSA04781	Unknown protein	3.82	5.36	1.4	5.36	21.94	4.1
RSA04837	Emb|CAB72473.1	4.99	6.72	1.35	6.72	17.67	2.63
RSA04844	Receptor protein kinase, putative	11.63	13.06	1.12	13.06	26.94	2.06
RSA04936	GDSL esterase/lipase	3.29	3.14	0.96	3.14	29.21	9.29
RSA04961	Heat shock protein, putative	2.71	8.73	3.22	8.73	0.95	0.11
RSA04962	Heat shock protein, putative	2.97	9.76	3.29	9.76	1.12	0.12
RSA04989	Unknown protein	2.07	16.92	8.16	16.92	4.32	0.26
RSA05093	UDP-glycosyltransferase 1	5.04	17.72	3.52	17.72	0.14	0.01
RSA05094	Beta-galactosidase	2.92	4.28	1.47	4.28	28.02	6.55
RSA05096	Beta-galactosidase	3.13	4.5	1.44	4.5	29.15	6.48
RSA05120	Leucine-rich repeat/extensin	111.96	15.39	0.14	15.39	4.88	0.32
RSA05184	Aux/IAA1-like	1.79	5.96	3.32	5.96	0.67	0.11
RSA05211	NAC domain protein	7.64	24.79	3.24	24.79	52.7	2.13
RSA05241	Amino acid permease family protein	3.79	8.36	2.2	8.36	17.42	2.08
RSA05262	Protein PLANT CADMIUM RESISTANCE 2	3.06	13.76	4.5	13.76	34.61	2.52
RSA05277	Two-component response regulator-like PRR1	69.92	58.42	0.84	58.42	0.42	0.01
RSA05278	Pseudo response regulator	50.52	42.53	0.84	42.53	0.17	0
RSA05279	Pseudo response regulator	50.02	42.71	0.85	42.71	0.28	0.01
RSA05346	Gag-pol polyprotein	0.63	5.93	9.46	5.93	1.89	0.32
RSA05370	Zeta-carotene desaturase protein	102.39	205.27	2	205.27	56.01	0.27
RSA05391	Zinc transporter	13.81	13.2	0.96	13.2	28.59	2.17
RSA05471	Argonaute family protein	16.87	6.37	0.38	6.37	18.96	2.97
RSA05509	Protein kinase	3.46	4.57	1.32	4.57	10.44	2.29
RSA05546	Zinc finger CCCH domain-containing protein	20	22.78	1.14	22.78	10.62	0.47
RSA05595	Cysteine-rich receptor-like protein kinase 40	15.32	13.91	0.91	13.91	28.66	2.06
RSA05615	WRKY transcription factor, putative	6.07	5.72	0.94	5.72	12.6	2.2
RSA05617	WRKY transcription factor, putative	6.12	5.8	0.95	5.8	13.4	2.31
RSA05624	Unknown protein	132.06	148.58	1.13	148.58	62.78	0.42
RSA05625	Unknown protein	98.17	111	1.13	111	45.67	0.41
RSA05626	Unknown protein	110.69	143.15	1.29	143.15	71.1	0.5
RSA05631	Ferric reductase oxidase	10.47	12.33	1.18	12.33	30.49	2.47
RSA05634	Ferric reductase oxidase	8.29	12.11	1.46	12.11	34.64	2.86
RSA05635	Ferric reductase oxidase	8.53	11.41	1.34	11.41	32.89	2.88
RSA05637	Multidrug resistance protein ABC transporter family	7.04	5.5	0.78	5.5	18.29	3.32
RSA05638	Multidrug resistance protein ABC transporter family	6.93	5.5	0.79	5.5	18.4	3.34
RSA05706	DNA polymerase III polC-type	6.87	20.5	2.98	20.5	8.48	0.41
RSA05707	DNA polymerase III polC-type	4.26	12.02	2.82	12.02	3.75	0.31
RSA05743	Nitrate reductase	4.88	6.31	1.29	6.31	28.85	4.57
RSA05755	Peptide transporter, putative	37.92	31.06	0.82	31.06	66.64	2.15
RSA05913	Thermosensitive gluconokinase, putative	4.56	6.58	1.44	6.58	16.68	2.54
RSA05961	Mitochondrial uncoupling protein, putative	17.84	14.25	0.8	14.25	5.79	0.41
RSA05995	NAC domain protein,	11.62	11.91	1.02	11.91	5.58	0.47
RSA06133	Epstein-Barr nuclear antigen, putative	7.54	144.61	19.17	144.61	29.43	0.2
RSA06135	Unknown protein	14.99	284.19	18.96	284.19	65.82	0.23
RSA06136	Unknown protein	20.27	122.9	6.06	122.9	32.07	0.26
RSA06137	Unknown protein	6.51	129.73	19.93	129.73	26.79	0.21
RSA06138	Unknown protein	7.87	155.78	19.79	155.78	38.52	0.25
RSA06139	Unknown protein	10.57	162.15	15.35	162.15	49.82	0.31
RSA06147	Short-chain dehydrogenase/reductase family protein	27.6	12.5	0.45	12.5	4.03	0.32
RSA06148	Short-chain dehydrogenase/reductase family protein	27.06	10.44	0.39	10.44	3.22	0.31
RSA06149	Short-chain dehydrogenase/reductase family protein	26.82	11.89	0.44	11.89	3.54	0.3
RSA06150	Short-chain dehydrogenase/reductase family protein	27.09	11.24	0.41	11.24	3.54	0.32
RSA06151	Short-chain dehydrogenase/reductase family protein	28.3	12.97	0.46	12.97	3.24	0.25
RSA06199	Amine oxidase	7.14	8.66	1.21	8.66	18.84	2.18
RSA06224	MLO-like protein	8.62	36.09	4.19	36.09	10.32	0.29
RSA06340	Acid phosphatase-like protein	5.29	4.78	0.9	4.78	11.63	2.43
RSA06360	rRNA/tRNA 2'-O-methyltransferase fibrillarin-like protein 1	47.48	46.55	0.98	46.55	94.04	2.02
RSA06395	Something about silencing protein	7.07	5.46	0.77	5.46	12.82	2.35
RSA06396	Something about silencing protein	7.16	5.65	0.79	5.65	13.61	2.41
RSA06403	DUF579 protein	68.03	21.61	0.32	21.61	62.77	2.9
RSA06446	GRAM-containing/ABA-responsive protein	8.16	10.48	1.28	10.48	21.61	2.06
RSA06473	Gb|AAC95187.1	9.54	7.99	0.84	7.99	3.76	0.47
RSA06485	Cytochrome P450	11.06	9.64	0.87	9.64	27.82	2.89
RSA06490	Cytochrome P450	10.16	9.09	0.89	9.09	27.17	2.99
RSA06495	Cytochrome P450	8.42	7.78	0.92	7.78	22.17	2.85
RSA06497	Cytochrome P450	9.31	8.33	0.89	8.33	22.78	2.74
RSA06533	Ring finger protein, putative	6.08	17.39	2.86	17.39	47.76	2.75
RSA06545	Auxin-induced protein-like protein	4.69	6.24	1.33	6.24	1.5	0.24
RSA06546	auxin-induced protein 15A-like	4.57	8.65	1.89	8.65	1.36	0.16
RSA06571	Cyclin family protein	9.62	8.6	0.89	8.6	17.75	2.07
RSA06585	Ethylene receptor	9.86	8.15	0.83	8.15	29.62	3.63
RSA06607	Peroxidase 25, putative	15.52	17.78	1.15	17.78	45.64	2.57
RSA06639	Pectin acetylesterase	8.67	28.11	3.24	28.11	13.56	0.48
RSA06708	Wall-associated kinase, putative	1.21	4.66	3.86	4.66	14.32	3.07
RSA06727	Unknown protein	1.37	1.76	1.29	1.76	13.31	7.58
RSA06844	Trehalase	15.66	4.6	0.29	4.6	17.28	3.75
RSA06890	RNA recognition motif-containing family protein	26.55	32.63	1.23	32.63	14.76	0.45
RSA06944	Zinc finger protein CONSTANS-LIKE 1	33.52	31.65	0.94	31.65	15.96	0.5
RSA07010	Zinc finger protein CONSTANS-like protein	9.46	8.31	0.88	8.31	44.71	5.38
RSA07011	Zinc finger protein CONSTANS-like protein	10.78	9.66	0.9	9.66	49.71	5.14
RSA07529	Receptor protein kinase-like protein	3.37	3.25	0.96	3.25	9.31	2.86
RSA07669	1-aminocyclopropane-1-carboxylate oxidase	14.24	77.64	5.45	77.64	33.95	0.44
RSA07670	Glutamate-gated kainate-type ion channel receptor subunit GluR5	25.24	493.3	19.54	493.3	146.11	0.3
RSA07671	Glutamate-gated kainate-type ion channel receptor subunit GluR5	25.15	488.78	19.44	488.78	144.68	0.3
RSA07722	At3g11590/F24K9_26	13	13.35	1.03	13.35	28.23	2.11
RSA07734	BAG family molecular chaperone regulator 1	7.06	22.73	3.22	22.73	7.77	0.34
RSA07767	Zinc finger protein	34.42	34.29	1	34.29	70.53	2.06
RSA07768	Zinc finger protein	27.93	25.67	0.92	25.67	52.73	2.05
RSA07808	NADH dehydrogenase, putative	12.73	16.95	1.33	16.95	3.78	0.22
RSA07895	Unknown protein	10.73	10.58	0.99	10.58	0.27	0.03
RSA07936	Receptor-like protein kinase	6.43	6.23	0.97	6.23	28.15	4.52
RSA07988	bHLH family protein BIM1	22.95	22.15	0.97	22.15	10.3	0.47
RSA07989	Transcription factor bHLH	23.74	22.64	0.95	22.64	10.49	0.46
RSA08075	NB-ARC domain containing protein, expressed	12.01	13.1	1.09	13.1	29.12	2.22
RSA08098	At1g56580/F25P12_18	173.76	201.6	1.16	201.6	86.34	0.43
RSA08155	50S ribosomal protein L19	72.45	79.39	1.1	79.39	37.01	0.47
RSA08171	Zinc finger CCCH domain-containing protein 29-like protein	26.2	28.23	1.08	28.23	60.74	2.15
RSA08180	Unknown protein	9.19	30.83	3.36	30.83	5.65	0.18
RSA08181	Unknown protein	8.34	30.58	3.67	30.58	5	0.16
RSA08182	Unknown protein	5.12	25.5	4.98	25.5	7.5	0.29
RSA08222	Homeobox protein knotted-1-like 3	9.91	11.72	1.18	11.72	25.85	2.21
RSA08227	Dof zinc finger protein	36.22	32.04	0.88	32.04	65.3	2.04
RSA08228	Dof zinc finger protein	36.89	31.06	0.84	31.06	64.55	2.08
RSA08243	SCARECROW-LIKE 1 family protein	16.7	15.33	0.92	15.33	37.1	2.42
RSA08244	SCARECROW-LIKE 1 family protein	16.05	14.88	0.93	14.88	36.4	2.45
RSA08255	Ankyrin repeat family protein	3.63	3.78	1.04	3.78	15.11	3.99
RSA08329	Nitrate reductase	7.31	7.61	1.04	7.61	26.54	3.49
RSA08332	Enhanced disease susceptibility 1	65.89	87.78	1.33	87.78	218.76	2.49
RSA08382	TPR domain protein	28.74	60.56	2.11	60.56	20.96	0.35
RSA08383	TPR domain protein	45.38	91.39	2.01	91.39	35.16	0.38
RSA08433	Retrotransposon gag protein	1.87	1.41	0.75	1.41	46.08	32.76
RSA08434	Retrotransposon gag protein	1.38	1.56	1.13	1.56	51.66	33.19
RSA08448	Amino acid permease	18.74	58.08	3.1	58.08	166.46	2.87
RSA08459	GDSL esterase/lipase	1.4	7.95	5.69	7.95	0.68	0.09
RSA08470	Protein TIFY 4A	29.46	26.77	0.91	26.77	9.6	0.36
RSA08535	Sulfate transporter 3.2 family protein	6.53	9.1	1.39	9.1	20.49	2.25
RSA08588	Chaperone protein clpB	21.49	8.15	0.38	8.15	23.31	2.86
RSA08589	Chaperone protein clpB	20.94	8.21	0.39	8.21	22.44	2.73
RSA08613	Unknown protein	5.21	20.34	3.9	20.34	50.43	2.48
RSA08672	Heat Stress Transcription Factor family protein	4.8	21.1	4.4	21.1	5.25	0.25
RSA08693	O-methyltransferase, putative	2.02	2.67	1.32	2.67	10.3	3.86
RSA08703	Unknown protein	1.6	2.01	1.26	2.01	13.13	6.54
RSA08757	Serine/threonine protein kinase	7.15	5.95	0.83	5.95	13.94	2.34
RSA08846	LETM1 and EF-hand domain-containing protein 1, mitochondrial	15.5	15.3	0.99	15.3	34.46	2.25
RSA08956	Unknown protein	2.19	11.23	5.13	11.23	2	0.18
RSA09024	Cc-nbs-lrr resistance protein	5.02	3.94	0.78	3.94	10.6	2.69
RSA09087	Receptor-like protein kinase	21.31	18.79	0.88	18.79	7.45	0.4
RSA09094	Polyadenylate-binding protein 1-B	76.84	69.33	0.9	69.33	140.21	2.02
RSA09108	Ankyrin repeat family protein	9.7	8.04	0.83	8.04	30.74	3.82
RSA09151	Transposon Ty1-PL Gag-Pol polyprotein	197.95	216.42	1.09	216.42	21.79	0.1
RSA09152	Transposon Ty1-PL Gag-Pol polyprotein	208.53	227.83	1.09	227.83	22.26	0.1
RSA09153	Transposon Ty1-PL Gag-Pol polyprotein	193.99	212.09	1.09	212.09	21.21	0.1
RSA09154	Transposon Ty1-PL Gag-Pol polyprotein	179.97	198.81	1.1	198.81	19.79	0.1
RSA09155	Transposon Ty1-PL Gag-Pol polyprotein	176.74	195.17	1.1	195.17	19.3	0.1
RSA09156	Transposon Ty1-PL Gag-Pol polyprotein	184.88	201.1	1.09	201.1	20.3	0.1
RSA09158	Transposon Ty1-PL Gag-Pol polyprotein	196.91	217.83	1.11	217.83	21.51	0.1
RSA09264	Unknown protein	8.53	8.01	0.94	8.01	19.1	2.39
RSA09271	ABC1 family protein	24.81	29.12	1.17	29.12	14.65	0.5
RSA09345	Cytochrome P450	0.34	25.07	74.48	25.07	186.23	7.43
RSA09361	Receptor protein kinase-like protein	5.66	5.49	0.97	5.49	18.05	3.29
RSA09365	Serine carboxypeptidase, putative	14.84	3.94	0.27	3.94	11	2.79
RSA09367	F26K24.10 protein	23.42	21.76	0.93	21.76	48.12	2.21
RSA09368	F26K24.10 protein	20.29	20.18	0.99	20.18	43.14	2.14
RSA09369	F26K24.10 protein	19.13	19.67	1.03	19.67	39.39	2
RSA09453	Cytochrome P450	3.68	5.11	1.39	5.11	18.67	3.65
RSA09454	Cytochrome P450	2.9	3.45	1.19	3.45	12.56	3.64
RSA09561	Unknown protein	0.11	11.53	104.79	11.53	5.13	0.44
RSA09626	U-box domain-containing protein	4.97	6.5	1.31	6.5	15.44	2.37
RSA09703	Receptor like kinase	0.72	6.85	9.55	6.85	16.68	2.44
RSA09729	Sugar transporter, putative	1.14	7.05	6.21	7.05	2.39	0.34
RSA09755	LOL1	15.64	22.22	1.42	22.22	70.21	3.16
RSA09760	Unknown protein	12.96	15.95	1.23	15.95	2.04	0.13
RSA09799	Dihydroflavonol 4-reductase family	37.78	8.77	0.23	8.77	1.56	0.18
RSA09829	Cytochrome P450 family protein	269.85	115.39	0.43	115.39	36.06	0.31
RSA09904	F18O14.5	14.24	4.29	0.3	4.29	11.5	2.68
RSA09969	WRKY transcription factor	13.29	27.49	2.07	27.49	80.6	2.93
RSA09970	Calcium-transporting ATPase 1	6.08	5.77	0.95	5.77	13.37	2.32
RSA09993	ABC transporter G family member	6.63	6.96	1.05	6.96	14.91	2.14
RSA10037	Branched-chain-amino-acid aminotransferase	2.23	6.73	3.02	6.73	25.27	3.76
RSA10040	ABC transporter C family protein	6.91	5.48	0.79	5.48	15.11	2.76
RSA10082	C2H2 zinc finger protein	11.59	8.97	0.77	8.97	2.59	0.29
RSA10115	Unknown protein	7.52	17.29	2.3	17.29	5.6	0.32
RSA10116	Unknown protein	5.91	20.01	3.38	20.01	4.04	0.2
RSA10117	Unknown protein	6.43	19.72	3.07	19.72	4.93	0.25
RSA10128	Conserved hypothetical plastid protein Ycf45	6.43	15.15	2.35	15.15	3.82	0.25
RSA10159	Beta-galactosidase	3.92	5.43	1.38	5.43	30.84	5.68
RSA10164	MATE efflux family protein	5.55	7.17	1.29	7.17	23.75	3.31
RSA10174	Auxin-responsive protein	2.33	7.69	3.3	7.69	1.17	0.15
RSA10192	Gag-pol polyprotein	0.72	6.46	8.98	6.46	2.02	0.31
RSA10228	Fructosamine kinase family protein	8.71	9.83	1.13	9.83	4.47	0.45
RSA10233	LOB domain protein 39	0.2	33.79	171.8	33.79	3.25	0.1
RSA10251	Peptide transporter, putative	38.58	31.59	0.82	31.59	67.67	2.14
RSA10303	Filament-like plant protein	25.15	5.87	0.23	5.87	15.57	2.65
RSA10325	TIR-NBS-LRR	3.02	3.29	1.09	3.29	10.49	3.19
RSA10350	Cytochrome P450	9.65	9.54	0.99	9.54	25.77	2.7
RSA10351	Cytochrome P450	8.26	8.27	1	8.27	20.99	2.54
RSA10390	Cytochrome P450, putative	31.1	39.67	1.28	39.67	17	0.43
RSA10391	Cytochrome P450, putative	30.47	38.85	1.27	38.85	16.93	0.44
RSA10440	Charged multivesicular body protein 3	6.65	5.18	0.78	5.18	13.15	2.54
RSA10511	Ammonium transporter	7.65	9.1	1.19	9.1	3.82	0.42
RSA10540	Multidrug and toxin extrusion protein 1	13.36	3.04	0.23	3.04	8.83	2.9
RSA10564	Lipase, putative, expressed	3.24	19.39	5.99	19.39	5.81	0.3
RSA10878	Unknown protein	26.86	8.9	0.33	8.9	27.99	3.14
RSA11058	Anthocyanidin 3-O-glucosyltransferase	25.08	112.05	4.47	112.05	7.53	0.07
RSA11091	Pleiotropic drug resistance ABC transporter family protein	11.15	31.61	2.84	31.61	146.56	4.64
RSA11146	Cytochrome P450	20.25	2.93	0.14	2.93	11.75	4.01
RSA11169	Unknown protein	14.29	36.99	2.59	36.99	15.27	0.41
RSA11206	Unknown protein	74.85	84.29	1.13	84.29	279.13	3.31
RSA11207	Unknown protein	38.55	40.93	1.06	40.93	147.99	3.62
RSA11241	Unknown protein	5.85	6.3	1.08	6.3	22.8	3.62
RSA11321	Unknown protein	1.28	12.63	9.89	12.63	43.38	3.43
RSA11329	Unknown protein	2836.69	1260.42	0.44	1260.42	554.39	0.44
RSA11330	Unknown protein	2.48	12.06	4.86	12.06	33.24	2.76
RSA11341	Major latex-like protein	4432.68	1426.29	0.32	1426.29	166.7	0.12
RSA11381	Unknown protein	80.07	99.81	1.25	99.81	48.51	0.49
RSA11426	UDP-glycosyltransferase 1	17.85	56.13	3.14	56.13	0.29	0.01
RSA11459	Unknown protein	2.05	26.06	12.71	26.06	93.89	3.6
RSA11468	Abhydrolase domain-containing protein FAM108C1	3.57	4	1.12	4	32.19	8.05
RSA11620	Phytosulfokines, putative	5.55	33.94	6.12	33.94	176.69	5.21
RSA11716	Unknown protein	5.86	22.45	3.83	22.45	98.04	4.37
RSA11789	Unknown protein	124.34	107.26	0.86	107.26	41.95	0.39
RSA11791	Unknown protein	135.22	119.07	0.88	119.07	46.64	0.39
RSA11882	Unknown protein	13.71	14.86	1.08	14.86	3.94	0.27
RSA11892	Unknown protein	1.82	2.66	1.46	2.66	31.01	11.66
RSA11925	BZIP transcription factor family protein	18.34	20.57	1.12	20.57	8.84	0.43
RSA11955	Unknown protein	22.43	25.18	1.12	25.18	2.67	0.11
RSA11956	Unknown protein	10.32	14.02	1.36	14.02	0.94	0.07
RSA12025	Unknown protein	41.51	44.52	1.07	44.52	16.04	0.36
RSA12028	3-hydroxyacyl-[acyl-carrier-protein] dehydratase FabZ	21.77	18.17	0.83	18.17	3.21	0.18
RSA12029	3-hydroxyacyl-[acyl-carrier-protein] dehydratase FabZ	24.11	19.88	0.82	19.88	3.5	0.18
RSA12144	Unknown protein	27.3	29.95	1.1	29.95	11.57	0.39
RSA12247	Receptor protein kinase-like protein	10.24	1.14	0.11	1.14	10.41	9.13
RSA12387	Unknown protein	96.59	32.75	0.34	32.75	16.34	0.5
RSA12390	WW domain containing protein, expressed	26.18	20.96	0.8	20.96	8.86	0.42
RSA12411	Unknown protein	7.72	24.5	3.17	24.5	0.7	0.03
RSA12412	Unknown protein	6.47	19.35	2.99	19.35	0.84	0.04
RSA12457	KDEL motif-containing protein 1, putative	6.32	6	0.95	6	28.52	4.75
RSA12477	Unknown protein	3.64	5.32	1.46	5.32	25.6	4.81
RSA12499	Peptidyl-prolyl cis-trans isomerase B	11.34	10.53	0.93	10.53	34.22	3.25
RSA12529	NAC domain protein	18.3	18.03	0.99	18.03	40.95	2.27
RSA12549	Endoglucanase 6	39.21	45.73	1.17	45.73	5.58	0.12
RSA12622	Unknown protein	0	9.44	944	9.44	0	0
RSA13075	Zinc finger protein	1.11	9.14	8.26	9.14	0.89	0.1
RSA13461	Unknown protein	0	10.73	1072.67	10.73	1.03	0.1
RSA13676	Unknown protein	0	0	1	0	7.26	726
RSA13751	Receptor-like kinase	0.96	0.99	1.03	0.99	7.22	7.31
RSA13783	Unknown protein	1.53	16.88	11.03	16.88	1.79	0.11
RSA14075	Germin-like protein subfamily 3 member 4	0	0	1	0	17.55	1755
RSA14096	Unknown protein	4.37	5.88	1.34	5.88	0	0
RSA14579	Unknown protein	5.65	5.5	0.97	5.5	0	0
RSA14665	Unknown protein	8.17	7.76	0.95	7.76	1.41	0.18
RSA14891	Unknown protein	0	6.95	695	6.95	0.73	0.11
RSA15024	Unknown protein	7.48	7.29	0.97	7.29	1.37	0.19
RSA15484	Peptide transporter	2.37	3.07	1.3	3.07	19.89	6.47
RSA15588	Unknown protein	16.42	1.08	0.07	1.08	7.97	7.36
RSA15719	Unknown protein	9.8	10.18	1.04	10.18	3.52	0.35
RSA15747	Unknown protein	3.11	2.99	0.96	2.99	10.14	3.39
RSA16298	Receptor kinase	11.05	1.52	0.14	1.52	12.58	8.28
RSA16552	Mannan endo-1,4-beta-mannosidase	7.14	8.9	1.25	8.9	0.76	0.09
RSA16775	Unknown protein	5.41	87.31	16.14	87.31	0.49	0.01
RSA16838	DNA-directed RNA polymerase	8.54	7.09	0.83	7.09	17.57	2.48
RSA16858	CASP-like protein 7	0	0	1	0	6.75	675.33
RSA16893	Unknown protein	17.33	133.74	7.72	133.74	37.2	0.28
RSA16903	Unknown protein	4.67	5.56	1.19	5.56	24.64	4.43
RSA17122	Unknown protein	43.79	53.22	1.22	53.22	18.61	0.35
RSA17125	Phosphoenolpyruvate carboxykinase family protein	50.25	44.36	0.88	44.36	93.73	2.11
RSA17328	Protein RSI-1	7.85	22.15	2.82	22.15	6.91	0.31
RSA17356	Unknown protein	260.71	286.08	1.1	286.08	108.1	0.38
RSA17403	Tubulin alpha-2/alpha-4 chain	144.88	194.54	1.34	194.54	88.26	0.45
RSA17438	Unknown protein	3.7	2.92	0.79	2.92	24.8	8.48
RSA17656	Unknown protein	38.18	118.85	3.11	118.85	38.48	0.32
RSA17708	Unknown protein	20.16	24.51	1.22	24.51	8.97	0.37
RSA17855	Inosine-uridine preferring nucleoside hydrolase, putative	2.04	2.04	1	2.04	11.27	5.52
RSA17865	Peroxidase 73, putative	0	0	1	0	6.7	669.67
RSA17925	Unknown protein	1.81	24.88	13.77	24.88	3.53	0.14
RSA18009	Transposon Tf2-9 polyprotein	0	0	1	0	14.42	1442
RSA18111	Unknown protein	272.53	41.78	0.15	41.78	4.49	0.11
RSA18164	Mitochondrial dicarboxylate carrier protein, putative	19.65	67.95	3.46	67.95	269.79	3.97
RSA18227	Unknown protein	0.47	69.58	148.04	69.58	15.41	0.22
RSA18230	Transcription factor bHLH	11.8	0.3	0.03	0.3	5.52	18.21
RSA18271	Unknown protein	3.3	4.9	1.48	4.9	0.54	0.11
RSA18320	Unknown protein	56.71	45.44	0.8	45.44	3.02	0.07
RSA18396	UDP-glycosyltransferase 1	2.85	2.74	0.96	2.74	11.09	4.05
RSA18533	Glycerol-3-phosphate dehydrogenase [NAD(P)+]	48.66	58.9	1.21	58.9	19.55	0.33
RSA18534	Glycerol-3-phosphate dehydrogenase [NAD(P)+]	48.76	58.68	1.2	58.68	19.51	0.33
RSA18708	Transcription factor, putative	0	13.68	1368	13.68	2.77	0.2
RSA19163	1-aminocyclopropane-1-carboxylate oxidase-like protein 1	5.29	18.55	3.51	18.55	5.15	0.28	6.88	9.88	1.44
RSA19195	Multidrug and toxin extrusion protein 2	2.55	3.43	1.35	3.43	21.41	6.25
RSA19231	Unknown protein	0.83	0.97	1.16	0.97	9.5	9.79
RSA19318	Retrotransposon protein, putative, unclassified, expressed	13.89	31.72	2.28	31.72	11.99	0.38
RSA19338	1-deoxy-D-xylulose 5-phosphate synthase	0.75	0.6	0.8	0.6	12.71	21.3
RSA19384	Unknown protein	57.89	67.07	1.16	67.07	29.79	0.44
RSA19388	Major allergen Mal d 1.06C	1.05	40.5	38.69	40.5	316.71	7.82
RSA19389	Major allergen Mal d 1.06C	6.89	162.09	23.51	162.09	1410.93	8.7
RSA19612	Unknown protein	8.98	7.16	0.8	7.16	37.07	5.17
RSA19733	Unknown protein	0.26	7.56	28.7	7.56	0.78	0.1
RSA19843	Gibberellin 3-beta-hydroxylase family protein	4.56	5.23	1.15	5.23	0	0
RSA19870	Unknown protein	1214.22	3458.46	2.85	3458.46	632.18	0.18
RSA19887	ABC transporter family protein	8.37	11.33	1.35	11.33	1.85	0.16
RSA20025	UDP-glycosyltransferase 1	7.3	6.41	0.88	6.41	23.74	3.7
RSA20201	Gip1-like protein	75.52	583.91	7.73	583.91	31.55	0.05
RSA20276	Unknown protein	0	0	1	0	8.8	880.33
RSA20417	Receptor-like protein kinase	1.14	1.12	0.98	1.12	9.66	8.6
RSA20488	Unknown protein	13.83	14.38	1.04	14.38	0.98	0.07
RSA20497	Unknown protein	0	30.37	3036.67	30.37	5.29	0.17
RSA20523	Unknown protein	11.14	16.18	1.45	16.18	3.43	0.21
RSA20579	Ring finger protein, putative	7.34	8.24	1.12	8.24	0.91	0.11
RSA20620	Aquaporin PIP1	178.36	189.28	1.06	189.28	55.77	0.29
RSA21118	Cytochrome P450	6.69	6.14	0.92	6.14	20.28	3.3
RSA21290	Ring finger protein, putative	9.05	9.09	1	9.09	0.97	0.11
RSA21439	Nucleolar complex-associated protein, putative	6.15	4.87	0.79	4.87	13.04	2.68
RSA21460	Lipid transfer protein-like	35.91	34.82	0.97	34.82	10.2	0.29
RSA21481	WGS project CAID00000000 data, contig chromosome 04	10.23	1.59	0.16	1.59	7.44	4.69
RSA21538	Dbj|BAA84609.1	0	6.23	623.33	6.23	0	0
RSA21551	Unknown protein	25.65	10.4	0.41	10.4	45.44	4.37
RSA21610	Type I inositol-1,4,5-trisphosphate 5-phosphatase	0.51	0.7	1.36	0.7	5.62	8.06
RSA21643	GDSL esterase/lipase	34.96	9.3	0.27	9.3	22.62	2.43
RSA21705	Pleiotropic drug resistance ABC transporter family protein	20.28	58.83	2.9	58.83	220.81	3.75
RSA21828	Unknown protein	1.2	8	6.69	8	1.07	0.13
RSA21908	Zinc finger protein	1.45	1.51	1.04	1.51	40.06	26.53
RSA21971	Peptide transporter PTR3-A	14.06	19.74	1.4	19.74	76.75	3.89
RSA21985	Receptor-like protein kinase	1.37	1.55	1.13	1.55	14.21	9.17
RSA21993	Aldehyde dehydrogenase	3.65	3.84	1.05	3.84	13.29	3.46
RSA22458	Unknown protein	1.36	1.2	0.88	1.2	10.71	8.93
RSA22467	Auxin efflux carrier family protein	25.07	10.37	0.41	10.37	0.27	0.03
RSA22513	Unknown protein	12.31	17.45	1.42	17.45	2.42	0.14
RSA22530	NDR1/HIN1-LIKE 25 family protein	4.22	4.58	1.08	4.58	25.24	5.51
RSA22591	Unknown protein	0.45	25.66	57.03	25.66	356.82	13.9
RSA22701	Membrane protein-like protein	0.44	6.57	15.05	6.57	36.96	5.63
RSA22961	Unknown protein	4.9	4.34	0.89	4.34	0	0
RSA23031	Cytochrome P450	1.35	18.24	13.48	18.24	1.35	0.07
RSA23043	Gibberellin receptor GID1-like protein	3.6	4.62	1.29	4.62	18.82	4.07
RSA23108	Unknown protein	410.09	1434.06	3.5	1434.06	271.76	0.19
RSA23122	Unknown protein	3450.31	2607.54	0.76	2607.54	5211.41	2
RSA23247	Unknown protein	212.22	1674.51	7.89	1674.51	89.16	0.05
RSA23333	Unknown protein	0.86	17.88	20.71	17.88	2.38	0.13
RSA23430	Unknown protein	28.97	23.47	0.81	23.47	56.16	2.39
RSA23460	Pleiotropic drug resistance ABC transporter family protein	71.39	252.63	3.54	252.63	974.57	3.86
RSA23517	Zinc transporter protein	4.13	5.56	1.35	5.56	29.13	5.24
RSA23590	Unknown protein	1.71	36.65	21.47	36.65	2.79	0.08
RSA23659	Unknown protein	42.74	39.09	0.91	39.09	17.94	0.46
RSA23797	WD40 repeat-containing protein SMU1	11.15	10.04	0.9	10.04	25.52	2.54
RSA23949	MLO-like protein	2.45	3.33	1.36	3.33	15.55	4.67
RSA23967	Unknown protein	4.35	16.9	3.88	16.9	54.1	3.2
RSA23982	Unknown protein	0	0	1	0	16.72	1671.67
RSA24069	Unknown protein	199.19	63.2	0.32	63.2	151.1	2.39
RSA24078	Phytochrome kinase substrate-related family protein	2.91	3.83	1.32	3.83	19.49	5.09
RSA24145	Peptide transporter 2 family protein	1.33	1.25	0.94	1.25	9.69	7.73
RSA24155	Curculin-like (Mannose-binding) lectin family protein	3	3.28	1.09	3.28	18.32	5.59
RSA24195	Unknown protein	21.11	17.87	0.85	17.87	6.88	0.38
RSA24254	Unknown protein	2.37	15.97	6.74	15.97	50.6	3.17
RSA24353	Cellulose synthase 3	11.78	11.72	0.99	11.72	5.71	0.49
RSA24411	Sodium-bile acid cotransporter, putative	5.96	5.34	0.9	5.34	16.16	3.03
RSA24488	Lectin	2.5	1.93	0.77	1.93	8.4	4.35
RSA24508	Pol polyprotein	0	0	1	0	23	2300.33
RSA24551	Arabidopsis thaliana genomic DNA, chromosome 5, P1 clone:MOK16	5.73	5.96	1.04	5.96	41.39	6.95
RSA25087	Unknown protein	14.82	15.3	1.03	15.3	55.84	3.65
RSA25089	Unknown protein	0.44	32.98	75.53	32.98	0	0
RSA25090	Unknown protein	1.47	61.62	41.83	61.62	0.29	0
RSA25092	Glycine-rich protein	1.35	17.69	13.13	17.69	1.19	0.07
RSA25149	Dihydrolipoamide S-acetyltransferase family protein	64.09	22.91	0.36	22.91	8.27	0.36
RSA25270	Pumilio homolog 23	6.55	7.13	1.09	7.13	19.11	2.68
RSA25328	JHL06P13.17 protein	2.08	23.58	11.32	23.58	86.06	3.65
RSA25366	ABC1 family protein	3.99	10.11	2.53	10.11	3.14	0.31
RSA25405	Unknown protein	2	45.25	22.59	45.25	6.08	0.13
RSA25447	Arsenate reductase	92.08	69.77	0.76	69.77	165.26	2.37
RSA25455	Unknown protein	4.34	26.36	6.07	26.36	59.63	2.26
RSA25477	Unknown protein	2.58	11.67	4.52	11.67	64.63	5.54
RSA25520	Unknown protein	0	4.8	480.33	4.8	0.31	0.06
RSA25538	Peptide transporter, putative	42.99	47.7	1.11	47.7	23.21	0.49
RSA25553	homeobox protein 26 (HB26);	4.2	4.69	1.12	4.69	24.78	5.29
RSA25659	Zinc finger protein LSD1	6.72	6.37	0.95	6.37	27.2	4.27
RSA25754	UDP-glycosyltransferase 1	1.3	0.98	0.76	0.98	10.34	10.51
RSA26023	GDSL esterase/lipase	28.01	6.95	0.25	6.95	27.94	4.02
RSA26081	Phenazine biosynthesis-like domain-containing protein	1.27	8.5	6.69	8.5	0.12	0.01
RSA26109	Unknown protein	8.07	8.58	1.06	8.58	1.76	0.21
RSA26119	Unknown protein	7.14	5.82	0.82	5.82	20.74	3.56
RSA26120	Unknown protein	1.42	1.58	1.12	1.58	19.78	12.52
RSA26121	Aluminum-activated malate transporter	0.98	1.23	1.25	1.23	29.02	23.53
RSA26122	Aluminum-activated malate transporter	1.1	1.26	1.15	1.26	42.28	33.47
RSA26123	Aluminum-activated malate transporter	0.71	0.97	1.37	0.97	28.3	29.18
RSA26124	Aluminum-activated malate transporter	1.13	1.52	1.35	1.52	35.66	23.51
RSA26125	Unknown protein	0.87	1.01	1.16	1.01	10.67	10.56
RSA26126	Aluminum-activated malate transporter	0.87	0.81	0.93	0.81	32.51	39.97
RSA26127	Aluminum-activated malate transporter	0.89	1.33	1.5	1.33	36.47	27.35
RSA26128	Aluminum-activated malate transporter	1.32	1.5	1.13	1.5	40.08	26.72
RSA26129	Unknown protein	0.68	0.99	1.44	0.99	14.92	15.12
RSA26130	Aluminum-activated malate transporter	1.16	1.16	1	1.16	32.41	27.86
RSA26131	Unknown protein	1.2	0.93	0.77	0.93	20.84	22.49
RSA26327	Unknown protein	8.67	35.22	4.06	35.22	13.81	0.39
RSA26362	GDSL esterase/lipase	4.67	3.96	0.85	3.96	30.88	7.8
RSA26365	Unknown protein	9.25	2.89	0.31	2.89	0.56	0.19
RSA26393	T22H22.16 protein	10.24	8.92	0.87	8.92	2	0.22
RSA26414	Unknown protein	14.26	1.91	0.13	1.91	11.63	6.1
RSA26460	Glutathione s-transferase, putative	4.01	5.43	1.36	5.43	56.56	10.41
RSA26461	Unknown protein	2.07	2.66	1.28	2.66	30.98	11.63
RSA26463	Xyloglucan specific endoglucanase inhibitor	0.63	8.8	14.04	8.8	41.12	4.67
RSA26505	Peroxidase 3	20.2	5.58	0.28	5.58	33.41	5.99
RSA26546	Calcineurin B-like protein 4-2	0.95	0.73	0.76	0.73	10.05	13.83
RSA26674	MYB transcription factor	733.06	131.77	0.18	131.77	22.94	0.17
RSA26766	Small subunit processome component-like protein	11.21	11.11	0.99	11.11	24.36	2.19
RSA26767	Small subunit processome component-like protein	11.27	9.38	0.83	9.38	22.79	2.43
RSA26768	Small subunit processome component-like protein	10.91	8.73	0.8	8.73	20.68	2.37
RSA26907	Transcription factor SPATULA	16.79	4.76	0.28	4.76	0.73	0.15
RSA27009	Sigma factor binding protein 1	0.82	16.81	20.5	16.81	41.68	2.48
RSA27019	Cytochrome P450	1.81	1.81	1	1.81	35.55	19.68
RSA27080	Adipocyte plasma membrane-associated protein	26.02	89.76	3.45	89.76	31.9	0.36
RSA27081	Adipocyte plasma membrane-associated protein	8.64	36.39	4.21	36.39	118.37	3.25
RSA27099	Carotenoid isomerase	8.65	9.1	1.05	9.1	3.56	0.39
RSA27130	Annexin	17.79	16.93	0.95	16.93	2.53	0.15
RSA27171	Photosystem II 5 kDa protein	50.57	41.97	0.83	41.97	153.66	3.66
RSA27214	Proline rich protein	2250.68	1785.63	0.79	1785.63	3982.08	2.23
RSA27230	Leucine-rich repeat receptor-like protein kinase	20.59	1.08	0.05	1.08	27.61	25.64
RSA27279	Unknown protein	67.16	215.98	3.22	215.98	84.07	0.39
RSA27439	Pleiotropic drug resistance ABC transporter family protein	10.82	12.62	1.17	12.62	51.58	4.09
RSA27469	Scarecrow-like transcription factor 3 family protein	4.06	4.91	1.21	4.91	15.53	3.16
RSA27470	Scarecrow-like transcription factor 3 family protein	4.09	4.79	1.17	4.79	15.01	3.14
RSA27471	Scarecrow-like transcription factor 3 family protein	4.01	4.94	1.23	4.94	15.58	3.15
RSA27515	Reverse transcriptase (RNA-dependent DNA pol)	7.79	7.04	0.9	7.04	0.35	0.05
RSA27604	Aldehyde dehydrogenase, putative	3.93	13.04	3.31	13.04	0.66	0.05
RSA27666	Serine-rich family protein	2.77	14.33	5.17	14.33	100.77	7.03
RSA27817	Unknown protein	23.49	86.69	3.69	86.69	25.56	0.29
RSA27820	Unknown protein	3.39	14.22	4.19	14.22	1.85	0.13
RSA27866	Membrane protein-like protein	14.56	13.53	0.93	13.53	4.95	0.37
RSA27929	Unknown protein	11.36	13.61	1.2	13.61	2.81	0.21
RSA28035	Unknown protein	14.49	33.76	2.33	33.76	10.29	0.3
RSA28096	Unknown protein	23.71	80.3	3.39	80.3	162.38	2.02
RSA28098	Unknown protein	24.61	81.38	3.31	81.38	169.05	2.08
RSA28099	Unknown protein	24.36	79.11	3.25	79.11	162.04	2.05
RSA28112	Peptidyl-prolyl cis-trans isomerase	15.68	13.18	0.84	13.18	38.31	2.91
RSA28246	Nuclear transport factor 2 (NTF2) family protein	13.85	12.59	0.91	12.59	4.4	0.35
RSA28264	Transcription factor style2.1	40.5	32.97	0.81	32.97	7.64	0.23
RSA28380	Zinc ion binding protein	54.62	113.33	2.08	113.33	53.22	0.47
RSA28397	Sulfite exporter TauE/SafE family protein	0.51	8.9	17.56	8.9	3.82	0.43
RSA28431	Unknown protein	7.05	35.55	5.04	35.55	15.78	0.44
RSA28491	Aquaporin 2	665	894.55	1.35	894.55	423.3	0.47
RSA28499	Unknown protein	4.94	24.78	5.02	24.78	63.41	2.56
RSA28500	Unknown protein	7.65	33.22	4.34	33.22	80.71	2.43
RSA28520	Unknown protein	1.1	13.5	12.24	13.5	37.63	2.79
RSA28579	N-acetyltransferase, putative	2.24	3.04	1.36	3.04	13.11	4.31
RSA28580	N-acetyltransferase, putative	2.17	3.12	1.44	3.12	13.68	4.39
RSA28587	Unknown protein	16.71	37.39	2.24	37.39	15.26	0.41
RSA28736	Lachrymatory-factor synthase	4.88	16.36	3.35	16.36	0	0
RSA28781	Unknown protein	141.11	117.5	0.83	117.5	55.06	0.47
RSA28782	Unknown protein	143.46	122.39	0.85	122.39	55.65	0.45
RSA28851	SCARECROW-like protein	2.64	3.06	1.16	3.06	11.6	3.79
RSA28858	Cytochrome P450, putative	14.39	53.14	3.69	53.14	4.46	0.08
RSA28874	60S acidic ribosomal protein P1, putative	3.63	3.57	0.98	3.57	15.16	4.25
RSA28875	60S acidic ribosomal protein P1, putative	6.18	5.7	0.92	5.7	21.08	3.7
RSA28901	Ethylene responsive transcription factor 2a	9.88	4.08	0.41	4.08	24.01	5.88	5.84	9.05	1.55
RSA28906	Peroxidase 1	0.85	0.71	0.84	0.71	18.07	25.46
RSA28913	Unknown protein	5.12	3.92	0.76	3.92	78.04	19.93
RSA28956	ABC transporter family protein	5.3	7.77	1.47	7.77	1.45	0.19
RSA28967	Unknown protein	75.32	17.12	0.23	17.12	6.94	0.41
RSA28975	Unknown protein	2.57	43.2	16.79	43.2	8.66	0.2
RSA28982	Unknown protein	656.44	1973.29	3.01	1973.29	406.73	0.21
RSA29069	Chlorophyll A/B binding protein P4 chloroplastic-like protein	18.86	38.33	2.03	38.33	168.13	4.39
RSA29070	CP12, putative, expressed	219.73	312.31	1.42	312.31	100.74	0.32
RSA29117	TRYPTOPHAN SYNTHASE ALPHA CHAIN family protein	7.35	38.54	5.24	38.54	11.75	0.3
RSA29123	Non-symbiotic hemoglobin	15.86	1.04	0.07	1.04	108.37	103.87
RSA29172	Heavy-metal-associated domain-containing family protein	103.63	35.06	0.34	35.06	6.14	0.18
RSA29201	C2H2 zinc finger protein	9.7	1.39	0.14	1.39	8.98	6.45
RSA29268	Auxin-regulated protein	6.83	4.76	0.7	4.76	19.07	4
RSA29289	Unknown protein	38.66	11.03	0.29	11.03	3.44	0.31
RSA29298	Replication factor C subunit	9.17	10.62	1.16	10.62	26.21	2.47
RSA29309	Unknown protein	5.04	6.19	1.23	6.19	0.59	0.09
RSA29368	Unknown protein	0.5	9.4	18.93	9.4	0.71	0.08
RSA29389	Unknown protein	0.56	4.43	7.91	4.43	14.36	3.24
RSA29417	Extracellular ligand-gated ion channel	9.16	37.07	4.05	37.07	0.55	0.01
RSA29438	Unknown protein	2.73	10.93	4.01	10.93	2.45	0.22
RSA29455	Unknown protein	1.75	1.86	1.07	1.86	22.76	12.21
RSA29487	Unknown protein	6.94	9.45	1.36	9.45	40.54	4.29
RSA29489	Unknown protein	5.47	7.01	1.28	7.01	32.17	4.59
RSA29532	MYB transcription factor	0.59	5.57	9.49	5.57	18.56	3.33
RSA29574	Unknown protein	15.72	19.96	1.27	19.96	5.92	0.3
RSA29762	Protein CURVATURE THYLAKOID 1B, chloroplastic	61.66	17.41	0.28	17.41	53.92	3.1
RSA29776	At2g42180/T24P15.9	25.52	20.91	0.82	20.91	74.23	3.55
RSA29787	Serine/threonine-protein kinase	3.62	2.92	0.81	2.92	10.81	3.7
RSA29819	Reverse transcriptase (RNA-dependent DNA pol)	0.99	10.04	10.18	10.04	0.97	0.1
RSA29852	Unknown protein	2.89	2.28	0.79	2.28	9.77	4.29
RSA29855	Receptor-like protein kinase	6.82	6.83	1	6.83	22.09	3.23
RSA29879	Receptor-like protein kinase 5	6	19.69	3.28	19.69	47.77	2.43
RSA29907	Unknown protein	18.95	60.59	3.2	60.59	15.62	0.26
RSA29919	Cinnamyl alcohol dehydrogenase 3	10.7	12.11	1.13	12.11	31.58	2.61
RSA29920	Alcohol dehydrogenase, putative	12.88	14.48	1.12	14.48	36.76	2.54
RSA29977	GDSL esterase/lipase	46.58	10.09	0.22	10.09	2.39	0.24
RSA30087	Receptor-like protein kinase	8.83	7.65	0.87	7.65	25.07	3.28
RSA30088	Receptor-like protein kinase	7.88	7.15	0.91	7.15	24.36	3.41
RSA30143	Harpin-induced protein-like	1.08	4.82	4.48	4.82	27.51	5.7
RSA30159	Lachrymatory-factor synthase	2.9	14.36	4.95	14.36	0.7	0.05
RSA30162	B12D protein	2.62	9.68	3.69	9.68	28.4	2.93
RSA30227	Defensin protein 1	468.88	143.88	0.31	143.88	48.42	0.34
RSA30235	Oligopeptide transporter, putative	2.23	6.55	2.94	6.55	15.42	2.35
RSA30239	Peptidyl-prolyl cis-trans isomerase	38.25	11.97	0.31	11.97	3.74	0.31
RSA30240	Protein LHCP TRANSLOCATION DEFECT	56.78	15.31	0.27	15.31	5.1	0.33
RSA30254	Unknown protein	45.85	13.33	0.29	13.33	2.08	0.16
RSA30286	F23M19.3	8.58	8.32	0.97	8.32	20.53	2.47
RSA30288	Cytochrome P450, putative	1.04	0.85	0.82	0.85	30.16	35.35
RSA30304	RING finger family protein	17.68	72.03	4.07	72.03	10.82	0.15
RSA30365	Sigma factor sigb regulation protein rsbq, putative	26.24	22.32	0.85	22.32	86.03	3.85
RSA30412	UPF0161 protein	16.89	14.82	0.88	14.82	7.16	0.48
RSA30450	Aquaporin 1	637.35	579.98	0.91	579.98	193.49	0.33
RSA30453	Unknown protein	2.96	21.97	7.43	21.97	2.43	0.11
RSA30458	Transposon protein, putative, CACTA, En/Spm sub-class	1.41	1.92	1.36	1.92	9.36	4.87
RSA30534	Unknown protein	19.26	26.81	1.39	26.81	12.95	0.48
RSA30566	Fatty acid oxidation complex subunit alpha	168.04	229.69	1.37	229.69	93.71	0.41
RSA30612	Unknown protein	5.36	17.92	3.35	17.92	4.46	0.25
RSA30613	Unknown protein	10.91	11.31	1.04	11.31	2.69	0.24
RSA30671	Unknown protein	10.81	8.99	0.83	8.99	0.14	0.02
RSA30747	Glucan-endo-1 3-beta-glucosidase	0.17	0.22	1.34	0.22	45.66	204.46
RSA30773	Photosystem I reaction center subunit VI, chloroplastic	85.88	66.63	0.78	66.63	392.91	5.9
RSA30778	Pumilio, putative	3.38	3.51	1.04	3.51	8.89	2.53
RSA30875	Unknown protein	3.57	29.29	8.2	29.29	4.86	0.17
RSA30901	BTB/POZ domain-containing protein	19.71	8.04	0.41	8.04	20.42	2.54
RSA30927	Unknown protein	0.58	7.42	12.87	7.42	1.11	0.15
RSA30967	Haloacid dehalogenase-like hydrolase family protein	8.36	10.65	1.27	10.65	2.6	0.24
RSA30995	Endoglucanase 17	19.23	22.28	1.16	22.28	3.42	0.15
RSA31039	Auxilin-related protein 2	14.56	10.97	0.75	10.97	35.9	3.27
RSA31169	Unknown protein	10.07	33.5	3.33	33.5	7.63	0.23
RSA31248	Serine-threonine protein kinase, plant-type, putative	2.84	11.91	4.19	11.91	32.17	2.7
RSA31259	Unknown protein	1209.57	393.51	0.33	393.51	94.2	0.24
RSA31283	VQ motif-containing family protein	38.42	37.6	0.98	37.6	11.96	0.32
RSA31300	Nucleolar complex protein-like protein	5.49	7.14	1.3	7.14	16.87	2.36
RSA31313	Zinc import ATP-binding protein ZnuC	5.35	4.1	0.77	4.1	0	0
RSA31320	Alliinase family protein	18.22	6.44	0.35	6.44	18	2.79
RSA31347	NPR1 protein	13.15	5.54	0.42	5.54	13.47	2.43
RSA31373	MYB transcription factor	174.42	143.16	0.82	143.16	11.12	0.08
RSA31374	MYB transcription factor	194.33	156.05	0.8	156.05	11.78	0.08
RSA31403	RING finger protein	7.22	9.95	1.38	9.95	43.86	4.41
RSA31433	Adipocyte plasma membrane-associated protein, putative	4.51	19.36	4.29	19.36	9.27	0.48
RSA31486	Hydrolase family protein	0.24	2.76	11.34	2.76	19.77	7.16
RSA31517	Unknown protein	63.75	56.89	0.89	56.89	120.83	2.12
RSA31518	auxin-responsive protein SAUR71-like	1.09	183.12	168.52	183.12	0.85	0
RSA31623	cDNA, clone: J065136J21, full insert sequence	27.6	35.84	1.3	35.84	16.23	0.45
RSA31650	Vicilin; 7S globulin	3.91	5.68	1.45	5.68	0.68	0.12
RSA31694	Prostamide/prostaglandin F synthase	11.78	16.93	1.44	16.93	7.23	0.43
RSA31736	Dirigent-related protein	32.49	13.92	0.43	13.92	36.19	2.6
RSA31750	Transmembrane BAX inhibitor motif-containing protein 4	1.5	1.63	1.08	1.63	19.55	12.02
RSA31764	Cell wall protein	12944.8	788.45	0.06	788.45	30.71	0.04
RSA31765	Gty37 protein	18293	1172.62	0.06	1172.62	55.23	0.05
RSA31845	Cation channel family protein	16.16	22.72	1.41	22.72	64.64	2.84
RSA31901	Unknown protein	0	3.86	386.33	3.86	13.36	3.46
RSA31918	Basic helix-loop-helix protein, putative	269.51	25.04	0.09	25.04	11.08	0.44
RSA31927	EPIDERMAL PATTERNING FACTOR-like protein	32.51	6.29	0.19	6.29	1.29	0.2
RSA31979	Phytoalexin-deficient 4-2 protein	16.01	13.81	0.86	13.81	34.42	2.49
RSA31992	Unknown protein	10.2	14.04	1.38	14.04	4.42	0.31
RSA32033	Cellulose synthase-like protein	7.77	7.96	1.02	7.96	1.44	0.18
RSA32046	Receptor kinase	21.55	23.22	1.08	23.22	55.42	2.39
RSA32171	Chlorophyll a-b binding protein 8, chloroplastic	31.69	13.07	0.41	13.07	65.19	4.99
RSA32185	Aspartyl protease family protein	7.42	6.18	0.83	6.18	0	0
RSA32210	Hydroxyproline-rich glycoprotein	2.81	4.14	1.47	4.14	11.92	2.88
RSA32218	Unknown protein	17.9	21.76	1.22	21.76	51.85	2.38
RSA32219	Unknown protein	22.3	28.28	1.27	28.28	70.85	2.5
RSA32221	WAT1-related protein	36.87	13.39	0.36	13.39	5.79	0.43
RSA32249	Unknown protein	28.42	32.36	1.14	32.36	7.6	0.23
RSA32261	Lipid-transfer protein	595.4	95.06	0.16	95.06	39.34	0.41
RSA32265	Interactor of constitutive active ROPs	10.44	12.15	1.16	12.15	4.27	0.35
RSA32275	Unknown protein	11.71	12.65	1.08	12.65	52.26	4.13
RSA32327	Unknown protein	11.54	10.79	0.93	10.79	3.37	0.31
RSA32334	Subtilisin-like serine protease	2.27	6.79	2.99	6.79	0.7	0.1
RSA32335	Subtilisin-like protease	3.21	10.2	3.18	10.2	1.14	0.11
RSA32398	Metallo-beta-lactamase domain-containing protein	10.64	13.4	1.26	13.4	4.45	0.33
RSA32423	WGS project CAID00000000 data, contig chromosome 11	33.79	49.65	1.47	49.65	20.93	0.42
RSA32439	Mitogen-activated protein kinase kinase kinase 5	8.79	9.4	1.07	9.4	24.55	2.61
RSA32453	Sugar transport protein	2.03	1.8	0.89	1.8	13.02	7.22
RSA32521	Unknown protein	247.25	52.9	0.21	52.9	20.39	0.39
RSA32542	3-ketoacyl-CoA synthase	14.33	21.1	1.47	21.1	8.73	0.41
RSA32626	2-succinylbenzoate-CoA ligase	10.36	10.91	1.05	10.91	25.05	2.3
RSA32657	Cationic amino acid transporter	0.36	4.84	13.33	4.84	73.33	15.14
RSA32774	L-type lectin-domain containing receptor kinase IV.2	3.88	3.06	0.79	3.06	10.29	3.37
RSA32892	ABC1 protein kinase	10.69	9.45	0.88	9.45	4.49	0.47
RSA32926	IQ domain-containing protein	7.89	0.8	0.1	0.8	7.34	9.18
RSA32938	Copper-binding family protein	10.63	13.1	1.23	13.1	4.26	0.33
RSA32939	Heavy metal associated domain-containing protein	7.86	10.4	1.32	10.4	3.29	0.32
RSA32952	Unknown protein	33.49	7.73	0.23	7.73	1.67	0.22
RSA32962	CollinsiaIX-like protein	13.78	13.71	0.99	13.71	35.28	2.57
RSA32989	Cyclic nucleotide-gated ion channel	0.36	3.32	9.31	3.32	11.66	3.51
RSA33030	Cytochrome P450 family protein	6.43	38.07	5.92	38.07	5.42	0.14
RSA33069	Aux/IAA16	73.94	80.94	1.09	80.94	165.03	2.04
RSA33082	Leucine-rich receptor-like protein kinase	24.52	22.94	0.94	22.94	66.75	2.91
RSA33139	Tubulin beta-2 chain	82.9	34.78	0.42	34.78	11.14	0.32
RSA33146	Erg28 like protein, expressed	16.35	15.7	0.96	15.7	6.52	0.42
RSA33154	Unknown protein	3.01	8.7	2.89	8.7	30.48	3.5
RSA33185	4,5-DOPA dioxygenase extradiol-like protein	39.7	11.76	0.3	11.76	2.58	0.22
RSA33215	Aldo/keto reductase family protein	34.96	393.56	11.26	393.56	115.09	0.29
RSA33249	Cationic amino acid transporter, putative	0.6	7.04	11.73	7.04	1.69	0.24
RSA33267	Ethylene-responsive transcription factor 7	2.24	23.8	10.64	23.8	91.96	3.86
RSA33292	RNA-binding region-containing protein, putative	6.34	8.09	1.28	8.09	2.77	0.34
RSA33317	Rac-like GTP binding protein	7.04	5.57	0.79	5.57	0	0
RSA33320	Ras-like GTP-binding protein O-RHO	3.74	3.1	0.83	3.1	0	0
RSA33332	Pollen Ole e 1 allergen and extensin family protein	96.26	30.87	0.32	30.87	3.72	0.12
RSA33407	Dirigent-like protein	13.11	9.98	0.76	9.98	43.7	4.38
RSA33485	Harpin-induced protein	0	3.27	327	3.27	24.16	7.39
RSA33591	Homeodomain-like superfamily protein	6.03	6.26	1.04	6.26	15.71	2.51
RSA33596	Chlorophyll a-b binding protein 1, chloroplastic	32.88	25.81	0.78	25.81	68.38	2.65
RSA33633	Chlorophyll a-b binding protein 21, chloroplastic	6.06	8.55	1.41	8.55	36.33	4.25
RSA33729	LysM-domain containing receptor-like kinase	12.75	11.16	0.88	11.16	50.48	4.52
RSA33747	F-box protein	7.15	7.63	1.07	7.63	1.97	0.26
RSA33748	F-box protein	7.4	7.9	1.07	7.9	1.92	0.24
RSA33780	GDSL esterase/lipase	29.89	12.38	0.41	12.38	34.93	2.82
RSA33789	Major latex-like protein	10.72	168.64	15.74	168.64	24.95	0.15
RSA33790	Major latex-like protein	10.6	168.1	15.86	168.1	24.93	0.15
RSA33793	Unknown protein	4.19	3.86	0.92	3.86	20.99	5.44
RSA33808	Cytochrome P450 family protein	1.24	9.71	7.85	9.71	29.63	3.05
RSA33944	UDP glycosyltransferase	6.62	16.53	2.5	16.53	85.04	5.15
RSA33962	2-oxoglutarate (2OG) and Fe(II)-dependent oxygenase superfamily protein	8	17.61	2.2	17.61	44.43	2.52
RSA33963	2-oxoglutarate (2OG) and Fe(II)-dependent oxygenase superfamily protein	8.84	18.33	2.07	18.33	47.75	2.61
RSA34026	Copper binding protein 2	273.42	73.12	0.27	73.12	33.08	0.45
RSA34027	Copper binding protein 2	254.02	68.22	0.27	68.22	31.6	0.46
RSA34035	GDSL esterase/lipase	28.37	9	0.32	9	32.16	3.57
RSA34078	Unknown protein	2.98	75.18	25.26	75.18	21.06	0.28
RSA34080	Unknown protein	0.84	25.18	30.1	25.18	9.9	0.39
RSA34088	Maf protein, putative	8.36	7.11	0.85	7.11	1.76	0.25
RSA34093	Unknown protein	19.86	15.84	0.8	15.84	1.55	0.1
RSA34127	Chlorophyll a-b binding protein 25, chloroplastic	71.3	55.23	0.77	55.23	177.64	3.22
RSA34178	Protein LURP-one-related 11	5.76	5.48	0.95	5.48	1.66	0.3
RSA34205	Expressed protein, having alternate splicing products	68.66	33.59	0.49	33.59	10.79	0.32
RSA34244	cDNA clone:J013102L13, full insert sequence	11.04	11	1	11	2.56	0.23
RSA34272	Delta-9 desaturase	306.27	936.76	3.06	936.76	33.35	0.04
RSA34273	Delta-9 desaturase	248.18	954.75	3.85	954.75	31.5	0.03
RSA34274	Delta-9 desaturase	97.6	724.68	7.42	724.68	20	0.03
RSA34275	Delta-9 desaturase	100.12	755.65	7.55	755.65	19.69	0.03
RSA34302	Unknown protein	478.89	1746.72	3.65	1746.72	4026.84	2.31
RSA34303	Proline-rich protein	656.19	2276.76	3.47	2276.76	4921.36	2.16
RSA34317	Unknown protein	6.02	8.04	1.34	8.04	45.75	5.69
RSA34326	AT3g15630/MSJ11_3	196.58	148.61	0.76	148.61	60.6	0.41
RSA34332	Unknown protein	1.73	14.58	8.44	14.58	1.59	0.11
RSA34352	DNA-binding WRKY	45.14	59.85	1.33	59.85	192.31	3.21
RSA34390	Dof zinc finger protein	8.05	29.09	3.61	29.09	3.78	0.13
RSA34443	Transcription factor bHLH	22.92	23.49	1.02	23.49	50.97	2.17
RSA34448	Gibberellin 3-beta hydroxylase	0.78	30.45	39.2	30.45	0.99	0.03
RSA34453	Unknown protein	5.42	6.63	1.22	6.63	21.06	3.18
RSA34467	Unknown protein	1.23	13.04	10.57	13.04	3.23	0.25
RSA34468	Unknown protein	3.48	19.82	5.69	19.82	5.84	0.29
RSA34510	Kinase family protein	20.05	16.07	0.8	16.07	6.96	0.43
RSA34511	DNA-3-methyladenine glycosylase, putative	45.36	270.63	5.97	270.63	70.68	0.26
RSA34519	3-oxoacyl-[acyl-carrier-protein] reductase	66.02	16.61	0.25	16.61	7.23	0.44
RSA34560	Unknown protein	26.23	35.31	1.35	35.31	17.63	0.5
RSA34562	Unknown protein	52.85	68.48	1.3	68.48	32	0.47
RSA34614	Unknown protein	19.83	17.97	0.91	17.97	8.54	0.47
RSA34617	Unknown protein	20.47	17.55	0.86	17.55	41.77	2.38
RSA34654	U-box domain-containing protein	7.5	10.45	1.39	10.45	27.23	2.61
RSA34686	Pumilio-like protein 24	9.03	8.92	0.99	8.92	21.85	2.45
RSA34719	CA-responsive protein	3.04	3.73	1.23	3.73	11.36	3.05
RSA34775	Receptor protein kinase, putative	15.92	16.69	1.05	16.69	40.46	2.42
RSA34800	Heme oxygenase 2	117.24	37.31	0.32	37.31	86.69	2.32
RSA34812	GATA transcription factor	28.44	85.39	3	85.39	9.01	0.11
RSA34813	GATA transcription factor	28.38	82.05	2.89	82.05	8.68	0.11
RSA34845	Two-component response regulator ARR8, putative	34.85	28.76	0.83	28.76	92.4	3.21
RSA34864	Unknown protein	43.06	274.42	6.37	274.42	80.95	0.29
RSA34952	Cold-induced thioredoxin domain-containing protein	19.6	23.38	1.19	23.38	5.54	0.24
RSA34994	Unknown protein	14.77	20.65	1.4	20.65	3.29	0.16
RSA34995	Unknown protein	15.64	21.95	1.4	21.95	3.52	0.16
RSA35013	Beta xylosidase	28.21	9.77	0.35	9.77	1.28	0.13
RSA35021	Unknown protein	7.23	9.24	1.28	9.24	0.91	0.1
RSA35051	Kelch repeat protein, putative	19.9	5.39	0.27	5.39	17.23	3.2
RSA35112	Unknown protein	0	70.21	7021	70.21	1.75	0.02
RSA35113	Unknown protein	0	25.62	2562.33	25.62	0.33	0.01
RSA35121	Unknown protein	3.37	3.61	1.07	3.61	0.58	0.16
RSA35122	Unknown protein	4.84	4.93	1.02	4.93	0.7	0.14
RSA35124	Unknown protein	9.4	10.55	1.12	10.55	1.24	0.12
RSA35125	Unknown protein	3.68	3.85	1.05	3.85	0.83	0.21
RSA35127	Unknown protein	7.37	7.14	0.97	7.14	1.19	0.17
RSA35170	U3 small nucleolar RNA-interacting protein 2	8.73	8.69	1	8.69	21.99	2.53
RSA35239	NAC domain protein	0	0	1	0	4.07	407.33
RSA35257	F11A6.1 protein	2.11	1.92	0.91	1.92	8.47	4.41
RSA35274	50S ribosomal protein L18	60.06	62.11	1.03	62.11	29.23	0.47
RSA35329	Rap guanine nucleotide exchange factor 4	2.2	7.18	3.26	7.18	21.55	3
RSA35330	RING finger-like protein	19.74	16.79	0.85	16.79	42.25	2.52
RSA35331	RING finger-like protein	18.67	15.27	0.82	15.27	39.36	2.58
RSA35332	RING finger-like protein	21.89	19.93	0.91	19.93	46.61	2.34
RSA35333	RING finger-like protein	21.93	20.17	0.92	20.17	47.64	2.36
RSA35341	Midasin	5.57	6.35	1.14	6.35	14.75	2.32
RSA35346	ATP synthase gamma chain 1 family protein	33.3	29.96	0.9	29.96	60.1	2.01
RSA35347	Esterase PIR7B, putative	1.48	1.39	0.94	1.39	10.98	7.92
RSA35357	Ferredoxin-like protein	70.96	70.01	0.99	70.01	27.77	0.4
RSA35359	Nudix hydrolase 2	2.28	3.23	1.41	3.23	16.27	5.04
RSA35361	Nudix hydrolase	3.26	4.02	1.23	4.02	18	4.48
RSA35374	Major allergen Mal d 1	7.21	89.42	12.41	89.42	813.63	9.1
RSA35376	Major allergen Mal d 1	9.54	96.26	10.09	96.26	991.08	10.3
RSA35459	Ethylene receptor 1	8.32	8.69	1.04	8.69	25.67	2.96
RSA35460	Ethylene receptor 1	8.36	9.97	1.19	9.97	30.08	3.02
RSA35510	Non-specific lipid-transfer protein	6411.76	1470.98	0.23	1470.98	534.91	0.36
RSA35535	Glutaredoxin family protein	1.71	7.73	4.53	7.73	19.78	2.56
RSA35566	Auxilin, putative	10.04	8.29	0.83	8.29	20.4	2.46
RSA35586	Profilin	15.01	48.96	3.26	48.96	14.68	0.3
RSA35642	Unknown protein	18.03	13.75	0.76	13.75	32.29	2.35
RSA35686	Chalcone isomerase-like protein	35.98	12.25	0.34	12.25	5.34	0.44
RSA35752	Unknown protein	1.2	10	8.34	10	41.23	4.12
RSA35796	Invertase inhibitor	29.28	37.05	1.27	37.05	2.22	0.06
RSA35838	Unknown protein	32.03	30.73	0.96	30.73	11.33	0.37
RSA35839	Unknown protein	32.09	31.18	0.97	31.18	11.2	0.36
RSA35890	Polyphenol oxidase IV	158.65	51.46	0.32	51.46	6.5	0.13
RSA35908	Pyruvate kinase	202.91	96.58	0.48	96.58	32.72	0.34
RSA35972	Shikimate dehydrogenase, putative	173.98	11.99	0.07	11.99	29.31	2.44
RSA36011	Ribosome biogenesis protein BRX1-like protein	23.95	22.1	0.92	22.1	45.84	2.07
RSA36015	Unknown protein	1.16	10.9	9.43	10.9	2.89	0.27
RSA36038	Genomic DNA, chromosome 3, P1 clone: MLM24	13.75	15.11	1.1	15.11	37.31	2.47
RSA36093	Sex-determining region Y protein	270.99	100.1	0.37	100.1	16.51	0.16
RSA36094	Unknown protein	289.78	109.09	0.38	109.09	17.29	0.16
RSA36095	Plant cell wall protein SlTFR88	0.35	9.11	26.29	9.11	36.3	3.98
RSA36099	50S ribosomal protein L25, putative	28.61	13.39	0.47	13.39	27.02	2.02
RSA36113	Receptor-like kinase	5.02	5.75	1.15	5.75	14.19	2.47
RSA36144	Unknown protein	120.37	10.61	0.09	10.61	2.18	0.21
RSA36145	Unknown protein	92.29	8.69	0.09	8.69	0.97	0.11
RSA36252	Cytochrome P450 family protein, expressed	6.13	8.26	1.35	8.26	32.37	3.92
RSA36302	Ankyrin repeat-containing protein, putative	4.39	6.11	1.39	6.11	20.63	3.38
RSA36339	Lachrymatory-factor synthase, putative	15.2	13.06	0.86	13.06	56.7	4.34
RSA36340	Lachrymatory-factor synthase, putative	16.01	13.89	0.87	13.89	58.97	4.25
RSA36425	MLO-like protein	19.44	24.16	1.24	24.16	70.21	2.91
RSA36426	MLO-like protein	19.29	24.43	1.27	24.43	70.15	2.87
RSA36442	Bicaudal C-like protein	18	16.41	0.91	16.41	7.57	0.46
RSA36446	Bicaudal C-like protein	15.97	13.1	0.82	13.1	5.21	0.4
RSA36518	Heat shock family protein	15.8	22.96	1.45	22.96	48.84	2.13
RSA36526	Vacuolar invertase	138.4	190.39	1.38	190.39	7.19	0.04
RSA36570	Vesicular glutamate transporter 2.1	24.01	4.87	0.2	4.87	13.47	2.77
RSA36571	Vesicular glutamate transporter 2.1	27.62	4.1	0.15	4.1	14.42	3.52
RSA36578	Glutamate decarboxylase	3.48	9.78	2.81	9.78	61.15	6.25
RSA36612	Receptor-like protein kinase	4.77	3.83	0.8	3.83	12.12	3.17
RSA36645	TPD1	6.17	6.37	1.03	6.37	0.96	0.15
RSA36662	Anthranilate N-benzoyltransferase protein, putative	21.5	103.34	4.81	103.34	41.02	0.4
RSA36723	UPF0426 protein At1g28150, chloroplastic	238.07	205.37	0.86	205.37	74.38	0.36
RSA36766	Unknown protein	5	33.2	6.63	33.2	0.44	0.01
RSA36820	Amine oxidase	6.01	8.63	1.44	8.63	22.5	2.61
RSA36826	Chitinase	0	3.2	320	3.2	11.17	3.49
RSA36827	Chitinase	0.93	7.03	7.54	7.03	21.68	3.08
RSA36847	Single-stranded DNA-binding protein	3.03	3.96	1.31	3.96	11.23	2.83
RSA36870	Multiprotein-bridging factor, putative	90.41	109.97	1.22	109.97	30.63	0.28
RSA36878	Serine/threonine-protein kinase 3	1.25	8.18	6.56	8.18	1.98	0.24
RSA36886	TPR domain protein	137.05	205.98	1.5	205.98	44.19	0.21
RSA36931	Peroxyureidoacrylate/ureidoacrylate amidohydrolase RutB	44.5	52.78	1.19	52.78	25.71	0.49
RSA36976	Unknown protein	218.38	72.83	0.33	72.83	26.81	0.37
RSA36978	Unknown protein	39.56	13.9	0.35	13.9	3.7	0.27
RSA37013	Unknown protein	4.55	20.09	4.42	20.09	90.08	4.48
RSA37014	Transcription factor bHLH	9.91	30.03	3.03	30.03	140.1	4.67
RSA37117	Unknown protein	16.85	106.53	6.32	106.53	44.72	0.42
RSA37145	Late embryogenesis abundant hydroxyproline-rich glycoprotein	0.79	12.32	15.53	12.32	39.73	3.22
RSA37200	Leucine-rich repeat receptor-like protein kinase	8.46	7.88	0.93	7.88	26.1	3.31
RSA37201	Receptor protein kinase-like protein	10.94	10.5	0.96	10.5	33.37	3.18
RSA37242	Aquaporin-like protein	476.31	467.76	0.98	467.76	232.56	0.5
RSA37244	Temperature-induced lipocalin	36.1	33.86	0.94	33.86	83.79	2.47
RSA37247	Calmodulin-like protein	20.91	21.72	1.04	21.72	45.23	2.08
RSA37252	Cellulose synthase-like C1-2, glycosyltransferase family 2 protein	9.4	12.56	1.34	12.56	2.03	0.16
RSA37281	Nucleic acid binding , related	13.48	12.73	0.94	12.73	27.71	2.18
RSA37283	Phosphoprotein phosphatase, putative	67.53	56	0.83	56	24.4	0.44
RSA37292	Unknown protein	7.96	6.3	0.79	6.3	2.13	0.34
RSA37298	Cyclin-like F-box; Galactose oxidase, central	43.89	16.78	0.38	16.78	6	0.36
RSA37299	Quinone oxidoreductase, putative	27.58	20.66	0.75	20.66	9.63	0.47
RSA37338	Trihelix transcription factor GT-2	21.85	21.33	0.98	21.33	8.95	0.42
RSA37339	Germin-like protein 2	168.13	59.33	0.35	59.33	299.96	5.06
RSA37411	Alpha-amylase, putative	9.36	10.31	1.1	10.31	4.56	0.44
RSA37492	Zinc finger homeodomain protein 1	20.51	555.25	27.07	555.25	193.74	0.35
RSA37509	Receptor-like protein kinase	1.26	1.84	1.45	1.84	18.47	10.06
RSA37510	Receptor-like protein kinase	2.19	1.86	0.85	1.86	10.15	5.46
RSA37511	Receptor-like protein kinase	1.45	1.99	1.37	1.99	18.77	9.42
RSA37512	Receptor-like protein kinase	3.04	2.83	0.93	2.83	13.01	4.6
RSA37513	Receptor-like protein kinase	1.34	2.01	1.5	2.01	16.28	8.1
RSA37516	1-phosphatidylinositol-4,5-bisphosphate phosphodiesterase (Phosphoinositide-specific phospholipase c)	4.43	4.24	0.96	4.24	25.79	6.08
RSA37530	auxin-induced protein 15A-like	10.56	7.87	0.74	7.87	1.72	0.22
RSA37531	Ethylene-responsive transcription factor	4.58	16.17	3.53	16.17	62.1	3.84
RSA37554	Unknown protein	0.75	11.18	14.91	11.18	40.07	3.58
RSA37555	Syringolide-induced protein B13-1-9	0.63	14.48	22.87	14.48	43.24	2.99
RSA37672	F-box protein	12.93	3.72	0.29	3.72	13.47	3.62
RSA37689	NtPRp27-like protein	0.65	11.08	17.04	11.08	59.83	5.4
RSA37739	Unknown protein	9.97	4.53	0.45	4.53	17.62	3.89
RSA37788	12S seed storage globulin 1	194.93	245.27	1.26	245.27	19.77	0.08
RSA37789	12S seed storage globulin 1	193	237.88	1.23	237.88	18.66	0.08
RSA37806	Fasciclin-like arabinogalactan protein 1-like protein	395.41	302.7	0.77	302.7	149.36	0.49
RSA37816	Aux/IAA13 isoform X1	33.29	13.14	0.39	13.14	6.55	0.5
RSA37817	Aux/IAA13 isoform X1	31.83	13.3	0.42	13.3	6.68	0.5
RSA37818	Unknown protein	29.05	12	0.41	12	5.36	0.45
RSA37819	GDSL esterase/lipase	137.98	0.46	0	0.46	2.71	5.86
RSA37854	Unknown protein	10.19	11.27	1.11	11.27	26.58	2.36
RSA37867	BZIP transcription factor family protein	3.04	14.19	4.67	14.19	4.74	0.33
RSA37957	At2g17710/T17A5.17	103.15	135.96	1.32	135.96	36.07	0.27
RSA38057	Unknown protein	27.46	82.77	3.01	82.77	15.66	0.19
RSA38072	Unknown protein	24.57	22.37	0.91	22.37	79.25	3.54
RSA38073	Unknown protein	23.4	20.11	0.86	20.11	82.09	4.08
RSA38117	Chloroplast inner membrane localized protein	252.45	366.25	1.45	366.25	148.25	0.4
RSA38118	Chloroplast inner membrane localized protein	222.97	331.74	1.49	331.74	136.45	0.41
RSA38119	Chloroplast inner membrane localized protein	239.89	356.51	1.49	356.51	146.64	0.41
RSA38120	Chloroplast inner membrane localized protein	252.73	374.76	1.48	374.76	151.33	0.4
RSA38121	Chloroplast inner membrane localized protein	273.57	405.29	1.48	405.29	162.52	0.4
RSA38122	Chloroplast inner membrane localized protein	265.9	391.77	1.47	391.77	161.18	0.41
RSA38123	Chloroplast inner membrane localized protein	240.53	357.52	1.49	357.52	145.95	0.41
RSA38124	Chloroplast inner membrane localized protein	271.76	394	1.45	394	158.42	0.4
RSA38191	Aux/IAA27-like	58.7	28.52	0.49	28.52	101.47	3.56
RSA38200	Short-chain dehydrogenase/reductase family protein	12.04	9.05	0.75	9.05	1.58	0.17
RSA38201	Short-chain dehydrogenase/reductase family protein	13.68	10.27	0.75	10.27	1.7	0.17
RSA38202	Pectate lyase, putative	173.38	146.93	0.85	146.93	20.72	0.14
RSA38204	Genomic DNA, chromosome 3, P1 clone: MLM24	10.24	8.42	0.82	8.42	22.08	2.62
RSA38215	Acetyl-CoA-benzylalcohol acetyltransferase	0	5.21	521	5.21	32.77	6.29
RSA38229	Aspartic proteinase nepenthesin-2	20.46	1.9	0.09	1.9	7.28	3.83
RSA38230	Gibberellin-regulated protein	2003.2	7256.63	3.62	7256.63	932.33	0.13
RSA38284	Ethylene-responsive transcription factor	217.86	64.4	0.3	64.4	16.98	0.26
RSA38295	Exostosin-like protein	179.15	144.45	0.81	144.45	68.3	0.47
RSA38306	Enolase	58.35	28.2	0.48	28.2	12.34	0.44
RSA38307	Enolase	49.03	22.51	0.46	22.51	10.29	0.46
RSA38308	Enolase	57.25	25.84	0.45	25.84	11.62	0.45
RSA38319	Squalene synthase 1	148.79	125.9	0.85	125.9	282.95	2.25
RSA38333	Unknown protein	17.91	23.24	1.3	23.24	10.68	0.46
RSA38337	Unknown protein	17.76	24.15	1.36	24.15	10.59	0.44
RSA38346	Unknown protein	21.67	28.81	1.33	28.81	9.64	0.33
RSA38347	Unknown protein	26.98	34.27	1.27	34.27	10.37	0.3
RSA38364	Rickettsia 17 kDa surface antigen family protein	119.58	136.66	1.14	136.66	57.44	0.42
RSA38380	DNA-binding protein-like	201.65	176.69	0.88	176.69	35.13	0.2
RSA38389	Cellulose synthase-like C1-2, glycosyltransferase family 2 protein	43.62	63.49	1.46	63.49	11.07	0.17
RSA38419	Protoporphyrinogen IX oxidase	64	59.43	0.93	59.43	29.58	0.5
RSA38460	Delta 9 desaturase, putative	191.44	59.99	0.31	59.99	13.53	0.23
RSA38461	Delta 9 desaturase, putative	190.11	58.77	0.31	58.77	13.75	0.23
RSA38508	Mitochondrial carrier family	6.91	25.94	3.76	25.94	98.81	3.81
RSA38509	Mitochondrial carrier family	6.76	27.58	4.08	27.58	104.39	3.78
RSA38517	ABC transporter family protein	8.79	8.76	1	8.76	3.69	0.42
RSA38522	Universal stress protein family protein	30.96	65.06	2.1	65.06	209.06	3.21
RSA38524	Universal stress protein family protein	23.23	47.72	2.05	47.72	158.99	3.33
RSA38526	Universal stress protein	32	66.97	2.09	66.97	208.46	3.11
RSA38609	Alpha-glucan water dikinase, chloroplastic	6.32	22.74	3.6	22.74	4.99	0.22
RSA38610	Alpha-glucan water dikinase, chloroplastic	5.86	21.51	3.67	21.51	5.18	0.24
RSA38656	Brassinosteroid signaling positive regulator-related family protein	22.76	24.69	1.08	24.69	50.52	2.05
RSA38677	Unknown protein	0.27	27.94	102.21	27.94	0.77	0.03
RSA38678	Unknown protein	0.3	31.06	104.7	31.06	0.63	0.02
RSA38679	Unknown protein	0.28	34.29	121.04	34.29	0.79	0.02
RSA38680	Unknown protein	0.26	28.27	107.35	28.27	0.89	0.03
RSA38702	Kinesin-related protein	22.93	5.29	0.23	5.29	1.73	0.33
RSA38714	Lysine/histidine transporter	1.4	8.56	6.1	8.56	43.14	5.04
RSA38755	Protein FAM136A	12.49	9.8	0.78	9.8	21.91	2.24
RSA38756	Cyclin family protein	1.84	20.5	11.14	20.5	0.36	0.02
RSA38816	MLO-like protein	4.92	6.89	1.4	6.89	21.28	3.09
RSA38817	MLO-like protein	5.06	6.75	1.33	6.75	20.3	3.01
RSA38978	Very-long-chain 3-oxoacyl-CoA reductase-like protein	13.84	2.64	0.19	2.64	0.24	0.09
RSA39059	Enzyme of the cupin family protein	32.39	13.02	0.4	13.02	39.03	3
RSA39068	Unknown protein	2.58	2.49	0.96	2.49	29.61	11.91
RSA39152	Unknown protein	1.08	11.15	10.33	11.15	30.25	2.71
RSA39154	Unknown protein	1.04	8.83	8.52	8.83	25.01	2.83
RSA39157	Unknown protein	0.91	7.36	8.06	7.36	21.54	2.93
RSA39158	Unknown protein	0.83	8.56	10.28	8.56	24.43	2.85
RSA39178	BTB/POZ domain-containing protein	6.12	14.78	2.42	14.78	54.62	3.7
RSA39207	Glutathione S-transferase family protein	13.81	4.07	0.29	4.07	12.17	2.99
RSA39218	RING finger protein	6.97	8.4	1.2	8.4	38.85	4.63
RSA39219	RING finger protein	6.72	8.64	1.29	8.64	38.16	4.42
RSA39231	Low molecular weight phosphotyrosine protein phosphatase	26.32	30.23	1.15	30.23	14.32	0.47
RSA39253	Peptidyl-prolyl cis-trans isomerase	15.17	12.5	0.82	12.5	30.16	2.41
RSA39254	Peptidyl-prolyl cis-trans isomerase	15.09	12.7	0.84	12.7	31.25	2.46
RSA39292	Glutathione transferase	0.29	0.29	1.01	0.29	18.65	63.57
RSA39307	Early auxin response protein	2.17	12.55	5.79	12.55	1.19	0.09
RSA39308	Unknown protein	1.93	10.5	5.43	10.5	0.6	0.06
RSA39324	MYB transcription factor R2R3-like protein	4.97	4.14	0.83	4.14	25.45	6.15
RSA39340	Gibberellin receptor GID1, putative	53.91	3.88	0.07	3.88	10.31	2.66
RSA39390	NBS-LRR class disease resistance protein	0.96	10.06	10.48	10.06	46.74	4.65
RSA39391	NBS-LRR class disease resistance protein	0.73	10.25	14.04	10.25	45.99	4.49
RSA39392	NBS-LRR class disease resistance protein	1.26	13.81	10.99	13.81	57.31	4.15
RSA39393	NBS-LRR class disease resistance protein	1.36	12.71	9.33	12.71	55.05	4.33
RSA39394	Unknown protein	1.16	10.86	9.33	10.86	47.89	4.41
RSA39395	Unknown protein	0.63	8.7	13.8	8.7	40.28	4.63
RSA39396	Unknown protein	0.68	7.5	11.08	7.5	37.25	4.97
RSA39397	Unknown protein	1.08	11.81	10.9	11.81	50.16	4.25
RSA39440	Unknown protein	1.86	34.58	18.56	34.58	11.86	0.34
RSA39444	Two-component response regulator ARR8 family protein	7.33	7.62	1.04	7.62	33.56	4.41
RSA39474	Anthranilate N-benzoyltransferase protein, putative	9.75	12.17	1.25	12.17	26.52	2.18
RSA39485	Receptor-like kinase	25.11	10.85	0.43	10.85	26.3	2.42
RSA39488	Kinase family protein	23.36	5.76	0.25	5.76	1.09	0.19
RSA39515	Arabidopsis thaliana genomic DNA, chromosome 5, P1 clone:MOK16	13.98	17.45	1.25	17.45	6.57	0.38
RSA39516	Arabidopsis thaliana genomic DNA, chromosome 5, P1 clone:MOK16	14.68	18.16	1.24	18.16	6.96	0.38
RSA39517	Arabidopsis thaliana genomic DNA, chromosome 5, P1 clone:MOK16	14.69	18.97	1.29	18.97	6.99	0.37
RSA39525	trihelix transcription factor ASIL2	6.2	8.74	1.41	8.74	3.23	0.37
RSA39529	Unknown protein	10.95	13.06	1.19	13.06	4.74	0.36
RSA39553	Serine carboxypeptidase, putative	5.94	14.13	2.38	14.13	34.9	2.47
RSA39582	Transcription regulator, putative	9.75	11.54	1.18	11.54	46.66	4.04
RSA39867	Unknown protein	49.2	108.43	2.2	108.43	26.26	0.24
RSA39868	Genomic DNA, chromosome 3, P1 clone: MKP6	66.11	146.37	2.21	146.37	38.68	0.26
RSA39881	GMP synthase [glutamine-hydrolyzing], putative	11.81	10.17	0.86	10.17	24.87	2.44
RSA39951	Unknown protein	21.22	45.21	2.13	45.21	15.73	0.35
RSA39961	IAA-amino acid hydrolase ILR1-like protein	58.37	60.4	1.03	60.4	27.62	0.46
RSA39984	CRABS CLAW	95.24	40.26	0.42	40.26	1.39	0.03
RSA39985	CRABS CLAW	83.14	35.61	0.43	35.61	1.32	0.04
RSA40018	CM0216.240.nc protein	0	10.5	1050	10.5	1.16	0.11
RSA40019	CM0216.240.nc protein	0	9.58	958	9.58	1.11	0.12
RSA40062	Unknown protein	9.78	13.28	1.36	13.28	3.89	0.29
RSA40064	Unknown protein	10.17	15.19	1.49	15.19	4.41	0.29
RSA40073	Inducer of CBF expression 2 protein	42.44	36.44	0.86	36.44	10.9	0.3
RSA40074	Inducer of CBF expression 2 protein	44.84	38.25	0.85	38.25	12.06	0.32
RSA40135	Phytoene synthase protein	84.85	323.73	3.82	323.73	45.19	0.14
RSA40153	Auxin-induced protein 5NG4, putative	4.31	3	0.7	3	11.37	3.79
RSA40178	Peroxidase	0.45	7.06	15.58	7.06	18.86	2.67
RSA40187	MACPF domain-containing protein	3.85	4.65	1.21	4.65	13.21	2.84
RSA40249	E6-1 protein kinase	2117.02	901.06	0.43	901.06	404.79	0.45
RSA40269	Sex-linked protein 9	19.31	8.52	0.44	8.52	39.18	4.6
RSA40289	Cysteine-rich receptor-like protein kinase	2.97	3.08	1.04	3.08	16.58	5.39
RSA40290	Bidirectional sugar transporter N3	12.3	33.26	2.7	33.26	9.49	0.29
RSA40291	Bidirectional sugar transporter N3	12.2	34.94	2.86	34.94	9.07	0.26
RSA40292	Auxin efflux carrier family protein	23.29	32.14	1.38	32.14	69.9	2.17
RSA40349	Xyloglucan endotransglucosylase hydrolase	17.21	533.46	30.99	533.46	1089.18	2.04
RSA40473	Thylakoid lumenal 20 kDa protein	15.68	34.93	2.23	34.93	15.35	0.44
RSA40474	Thylakoid lumenal 20 kDa protein	15.42	33.93	2.2	33.93	15.46	0.46
RSA40494	Leucine carboxyl methyltransferase	2.01	23.31	11.6	23.31	4.94	0.21
RSA40497	Unknown protein	0.67	3.84	5.71	3.84	1.05	0.27
RSA40503	Glycine-rich family protein	20.23	16.01	0.79	16.01	53.14	3.32
RSA40504	Glycine-rich protein	21	15.98	0.76	15.98	50.95	3.19
RSA40548	At2g21180/F26H11.6	8.95	8.59	0.96	8.59	20.62	2.4
RSA40592	Unknown protein	18.08	71.97	3.98	71.97	148.55	2.06
RSA40599	Unknown protein	15.52	5.01	0.32	5.01	1.2	0.24
RSA40606	Nucleosome assembly protein family	26.22	25.86	0.99	25.86	54.88	2.12
RSA40632	Genomic DNA, chromosome 3, P1 clone: MEB5	57.69	60.91	1.06	60.91	29.34	0.48
RSA40645	Cytochrome P450	9.29	31.41	3.38	31.41	14.77	0.47
RSA40673	Phi-1-like phosphate-induced protein	71.88	308.85	4.3	308.85	4387.31	14.21
RSA40762	Thylakoid lumenal family protein	26.91	40.15	1.49	40.15	12.37	0.31
RSA40770	NAC transcription factor 097	9	7.17	0.8	7.17	18.98	2.65
RSA40786	Gibberellin receptor GID1, putative	190.92	267.43	1.4	267.43	121.9	0.46
RSA40790	5-nucleotidase	12.02	11.83	0.98	11.83	25.69	2.17
RSA40800	Mitochondrial carrier	8.73	11.45	1.31	11.45	2.31	0.2
RSA40820	MAP kinase phosphatase	8.23	8.53	1.04	8.53	18.86	2.21
RSA40833	Unknown protein	35.83	40.69	1.14	40.69	20.53	0.5
RSA40930	Purple acid phosphatase, putative	41.42	47.96	1.16	47.96	113.94	2.38
RSA40931	Purple acid phosphatase, putative	46.92	53.94	1.15	53.94	126.11	2.34
RSA40962	Unknown protein	5.01	27.08	5.41	27.08	11.6	0.43
RSA40968	BTB/POZ domain-containing protein	30.12	31.02	1.03	31.02	90.22	2.91
RSA40971	Non-race specific disease resistance 1	35.33	30.56	0.86	30.56	89.34	2.92
RSA40992	Remorin-4 protein	15	18.11	1.21	18.11	4.43	0.24
RSA41023	Unknown protein	7.53	9.42	1.25	9.42	0.88	0.09
RSA41101	Unknown protein	1.46	12.66	8.69	12.66	3.75	0.3
RSA41172	N-methyltransferase	641.25	239.2	0.37	239.2	582.72	2.44
RSA41186	Glucan endo-1,3-beta-glucosidase, putative	2.94	3.47	1.18	3.47	15.57	4.49
RSA41199	L-type lectin-domain containing receptor kinase IV.1	6.51	6.94	1.07	6.94	23.08	3.33
RSA41213	Chalcone isomerase	84.69	64.65	0.76	64.65	21.51	0.33
RSA41214	Chalcone isomerase	39.96	32.05	0.8	32.05	11.82	0.37
RSA41341	Ethylene-responsive transcription factor 6	76.64	154.45	2.02	154.45	424.3	2.75
RSA41377	Aspartic proteinase nepenthesin-1, putative	20.05	21.06	1.05	21.06	114.37	5.43
RSA41415	Phytoalexin deficient 4	6.61	6.92	1.05	6.92	20.39	2.95
RSA41499	Aquaporin	20.61	21.23	1.03	21.23	10.19	0.48
RSA41558	Pectinesterase inhibitor, putative	17.56	62.27	3.55	62.27	1.56	0.02
RSA41601	Insulin-degrading enzyme-related family protein	4.92	4.28	0.87	4.28	15.13	3.53
RSA41621	Two-component response regulator-like protein	26.3	10.3	0.39	10.3	5.04	0.49
RSA41676	Cotton fiber expressed protein 1	1.89	18.89	9.98	18.89	40.91	2.17
RSA41686	Unknown protein	62.19	15.42	0.25	15.42	7.6	0.49
RSA41703	GDSL esterase/lipase	17.14	13.29	0.78	13.29	4.97	0.37
RSA41715	Cysteine/Histidine-rich C1 domain family protein	14.55	17.77	1.22	17.77	46.92	2.64
RSA41720	Thylakoid membrane protein slr0575-like protein	69.71	161.8	2.32	161.8	58.35	0.36
RSA41752	Unknown protein	56.8	700.85	12.34	700.85	84.17	0.12
RSA41757	Cytochrome P450 family protein	60.57	3.89	0.06	3.89	0.95	0.25
RSA41808	Pectate lyase	559.82	736.31	1.32	736.31	124.67	0.17
RSA41809	Pectate lyase	552.6	823.53	1.49	823.53	139.82	0.17
RSA41811	Pectate lyase	416.54	1318.04	3.16	1318.04	216.45	0.16
RSA41812	Pectate lyase	391.86	1099.01	2.8	1099.01	174.43	0.16
RSA41813	Pectate lyase	429.76	1160.69	2.7	1160.69	190.06	0.16
RSA41821	Peptidase, trypsin-like serine and cysteine proteases	10.68	10.53	0.99	10.53	28.3	2.69
RSA41822	Peptidase, trypsin-like serine and cysteine proteases	6.38	7.64	1.2	7.64	19.66	2.57
RSA41823	Peptidase, trypsin-like serine and cysteine proteases	7.78	7.13	0.92	7.13	22.27	3.12
RSA41847	Type II peroxiredoxin 1	32.13	46.29	1.44	46.29	21.33	0.46
RSA41848	Type II peroxiredoxin 1	48.75	58.63	1.2	58.63	28.23	0.48
RSA41858	Mediator of RNA polymerase II transcription subunit 21	4.22	3.2	0.76	3.2	10.21	3.19
RSA41866	2-on-2 hemoglobin family protein	44.65	22.53	0.5	22.53	6.02	0.27
RSA41868	Ethylene-responsive transcription factor 1	10.3	8.61	0.84	8.61	32.75	3.8
RSA41886	F-box	13.39	16.71	1.25	16.71	3.27	0.2
RSA41892	Unknown protein	87.24	765.07	8.77	765.07	127.92	0.17
RSA41893	Unknown protein	6.02	62.36	10.36	62.36	7.4	0.12
RSA41958	Peroxiredoxin Q family protein	192.48	72.7	0.38	72.7	23.78	0.33
RSA41981	Genomic DNA, chromosome 3, P1 clone: MLM24	8.93	9.83	1.1	9.83	29.04	2.95
RSA41983	IQ-domain 17	12.87	12.75	0.99	12.75	5.08	0.4
RSA42020	Chlorophyll a-b binding protein, chloroplastic	18.04	13.55	0.75	13.55	42.87	3.16
RSA42022	Chlorophyll a-b binding protein, chloroplastic	14.07	12.37	0.88	12.37	36.37	2.94
RSA42025	Chlorophyll a-b binding protein, chloroplastic	15.06	16.55	1.1	16.55	43.26	2.61
RSA42029	Chlorophyll a-b binding protein, chloroplastic	12.24	12.13	0.99	12.13	37.06	3.06
RSA42035	Chlorophyll a-b binding protein, chloroplastic	11.25	15.21	1.35	15.21	36.52	2.4
RSA42036	Chlorophyll a-b binding protein, chloroplastic	11.24	9.16	0.82	9.16	33.4	3.65
RSA42040	Chlorophyll a-b binding protein, chloroplastic	8.95	12.62	1.41	12.62	36.89	2.92
RSA42070	Unknown protein	44.22	37.41	0.85	37.41	79.27	2.12
RSA42071	Xyloglucan endotransglucosylase/hydrolase 4	8.44	50.9	6.03	50.9	208.82	4.1
RSA42075	CXE carboxylesterase	215.09	88.13	0.41	88.13	36.65	0.42
RSA42124	Unknown protein	26.03	35.61	1.37	35.61	11.9	0.33
RSA42181	Receptor-like protein kinase	11.82	3.82	0.32	3.82	13.36	3.5
RSA42183	Receptor-like protein kinase	11.82	3.66	0.31	3.66	13.68	3.73
RSA42230	Late embryogenesis abundant hydroxyproline-rich glycoprotein	12.62	180.36	14.29	180.36	461.95	2.56
RSA42231	Unknown protein	6.94	112.95	16.27	112.95	281.84	2.5
RSA42252	Unknown protein	17.68	100.59	5.69	100.59	10.7	0.11
RSA42254	Laccase, putative	16.74	5.78	0.35	5.78	1.21	0.21
RSA42290	Ethylene-responsive transcription factor 12	12.99	26.57	2.05	26.57	3.79	0.14
RSA42313	Unknown protein	0.96	9.67	10.08	9.67	2.49	0.26
RSA42314	Unknown protein	31.4	72.25	2.3	72.25	36.12	0.5
RSA42315	Unknown protein	14.98	22.42	1.5	22.42	8.83	0.39
RSA42319	Unknown protein	36.37	73.74	2.03	73.74	33.43	0.45
RSA42320	Unknown protein	11.05	27.6	2.5	27.6	13.21	0.48
RSA42344	At1g65900/F12P19_7	22.93	18.74	0.82	18.74	0.97	0.05
RSA42388	NADH dehydrogenase [ubiquinone] iron-sulfur protein 4, mitochondrial	10.59	12.59	1.19	12.59	5.7	0.45
RSA42439	GDSL esterase/lipase	50	10.67	0.21	10.67	2.94	0.28
RSA42477	Cytochrome P450 family protein	7.57	11.33	1.5	11.33	51.84	4.58
RSA42480	Cytochrome P450 family protein	3.35	3.64	1.09	3.64	18.33	5.03
RSA42481	P-loop containing nucleoside triphosphate hydrolases superfamily protein	8.02	7.86	0.98	7.86	20.98	2.67
RSA42484	At1g17490/F1L3_4	14.46	17.92	1.24	17.92	7.92	0.44
RSA42485	At1g17490/F1L3_4	14.12	17.2	1.22	17.2	7	0.41
RSA42487	At1g17490/F1L3_4	17.81	19.78	1.11	19.78	8.85	0.45
RSA42488	At1g17490/F1L3_4	9.25	12.18	1.32	12.18	4.29	0.35
RSA42491	Ankyrin repeat-containing protein, putative	10.43	8.18	0.78	8.18	2.12	0.26
RSA42509	Plastocyanin family protein	54.6	21.45	0.39	21.45	99.12	4.62
RSA42640	GDSL esterase/lipase	51.95	5.01	0.1	5.01	0.74	0.15
RSA42650	Patatin B2, putative	81.03	20.88	0.26	20.88	54.47	2.61
RSA42651	Patatin B2, putative	113.13	29.72	0.26	29.72	73.24	2.46
RSA42754	Unknown protein	7.51	19.88	2.65	19.88	9.73	0.49
RSA42757	Subtilisin-like protease	12.21	73.7	6.04	73.7	178.13	2.42
RSA42758	Kinase family protein	45.97	38.28	0.83	38.28	81.76	2.14
RSA42782	DUF1118-domain-containing protein	46.79	68.48	1.46	68.48	28.54	0.42
RSA42805	Unknown protein	38.18	53.73	1.41	53.73	24.29	0.45
RSA42812	Photosystem II reaction center Psb28 protein	22.45	22.61	1.01	22.61	8.21	0.36
RSA42821	Unknown protein	0.84	20.41	24.39	20.41	73.3	3.59
RSA42845	Aldose 1-epimerase, putative	120.04	119.9	1	119.9	48.72	0.41
RSA42884	Alpha-glucan water dikinase 1, chloroplastic	8.73	30.63	3.51	30.63	8.42	0.27
RSA42981	Unknown protein	3.53	10.91	3.09	10.91	22.09	2.02
RSA43057	Multidrug and toxin extrusion protein 1	15.58	5.55	0.36	5.55	13.91	2.51
RSA43148	Cyanate hydratase	29.4	22.25	0.76	22.25	46.28	2.08
RSA43157	PROLINE-RICH protein 4	204.98	1554.28	7.58	1554.28	72.01	0.05
RSA43161	Ring finger protein, putative	17.53	14.12	0.81	14.12	32.16	2.28
RSA43162	Nucleoside diphosphate kinase	215.44	249.41	1.16	249.41	86.97	0.35
RSA43242	Serine hydroxymethyltransferase	14.16	11.91	0.84	11.91	34.61	2.91
RSA43243	Serine hydroxymethyltransferase	19.06	15.32	0.8	15.32	43.32	2.83
RSA43244	Serine hydroxymethyltransferase	8.23	7.28	0.89	7.28	20.11	2.76
RSA43278	Unknown protein	997.36	3212.99	3.22	3212.99	7438.25	2.32
RSA43279	Unknown protein	148.24	559.19	3.77	559.19	1211.71	2.17
RSA43280	Unknown protein	298.94	1127.51	3.77	1127.51	2642.28	2.34
RSA43281	Unknown protein	963.82	3220.12	3.34	3220.12	7293.28	2.26
RSA43310	Protein phosphatase 2c, putative	50.47	39.58	0.78	39.58	80.17	2.03
RSA43465	Desiccation-related protein PCC13-62	55.22	868.16	15.72	868.16	85.98	0.1
RSA43466	Desiccation-related protein PCC13-62	44.11	730.37	16.56	730.37	85.43	0.12
RSA43503	Unknown protein	18.17	60.38	3.32	60.38	309.03	5.12
RSA43504	Gibberellin receptor GID1, putative	37.45	100.72	2.69	100.72	556.1	5.52
RSA43508	Senescence-associated family protein	20.69	19.43	0.94	19.43	58.22	3
RSA43640	2-oxoglutarate-dependent dioxygenase-related family protein	8.48	8.42	0.99	8.42	22.49	2.67
RSA43641	CBS domain-containing protein-like	48.59	37.85	0.78	37.85	16.45	0.43
RSA43642	CBS domain-containing protein-like	47.04	36.78	0.78	36.78	16.9	0.46
RSA43643	30S ribosomal protein S5, putative	44.45	40.15	0.9	40.15	17.78	0.44
RSA43645	30S ribosomal protein S5, putative	43.29	37.33	0.86	37.33	16.07	0.43
RSA43715	Gibberellin 2-oxidase	7.69	28.38	3.69	28.38	102.5	3.61
RSA43716	Gibberellin 2-oxidase	8.83	32.69	3.7	32.69	121.42	3.71
RSA43805	Gamma-tubulin complex component 2	96.42	142.19	1.47	142.19	71.55	0.5
RSA43845	Receptor protein kinase, putative	10.16	15.26	1.5	15.26	2.21	0.15
RSA43875	Succinate dehydrogenase assembly factor 1, mitochondrial	13.87	16.87	1.22	16.87	7.17	0.43
RSA43936	Cellulose synthase	42.15	46.36	1.1	46.36	107.71	2.32
RSA43937	Glycine cleavage system h protein, putative	32.48	6.36	0.2	6.36	25.8	4.06
RSA43951	Aspartic proteinase nepenthesin-2	10.83	15.93	1.47	15.93	210.06	13.18
RSA43997	Mitochondrial chaperone BCS1	1.28	3.9	3.04	3.9	14.87	3.81
RSA44010	Ubiquinol oxidase	0.77	7.56	9.87	7.56	25.96	3.43
RSA44081	N-rich protein, putative	46.31	108.23	2.34	108.23	275.78	2.55
RSA44083	Leucine-rich repeat extensin-like protein 3	240.3	1744.16	7.26	1744.16	94.6	0.05
RSA44084	Unknown protein	135.92	1155.43	8.5	1155.43	61.68	0.05
RSA44142	EG45-like domain containing protein	1.02	1.41	1.39	1.41	11.14	7.88
RSA44161	Aspartate/tyrosine/aromatic aminotransferase	36.52	37.92	1.04	37.92	17.73	0.47
RSA44206	Protein ABIL1	38.29	17.45	0.46	17.45	4.19	0.24
RSA44207	Protein ABIL2, putative	33.77	13.98	0.41	13.98	3.74	0.27
RSA44222	Phospholipase D	4.91	6.37	1.3	6.37	17.33	2.72
RSA44235	Inducer of CBF expression 2 protein	15.87	14.75	0.93	14.75	4	0.27
RSA44236	Inducer of CBF expression 2 protein	17.98	15.75	0.88	15.75	4.96	0.31
RSA44295	WRKY transcription factor	26.47	33.59	1.27	33.59	103.28	3.07
RSA44296	WRKY transcription factor	29.92	40.17	1.34	40.17	116.85	2.91
RSA44297	WRKY transcription factor 26	13.5	18.59	1.38	18.59	40.11	2.16
RSA44304	Heat shock protein-related protein	51.49	38.46	0.75	38.46	78.26	2.04
RSA44306	Beta-1,3-galactosyltransferase 7	53.78	116.75	2.17	116.75	36.72	0.31
RSA44307	Transferase, transferring glycosyl groups, putative	16.47	17.27	1.05	17.27	37.61	2.18
RSA44312	Chaperone protein dnaJ-like protein	210.59	313.81	1.49	313.81	130.27	0.42
RSA44322	WAT1-related protein	44.21	64.35	1.46	64.35	11.73	0.18
RSA44323	WAT1-related protein	53.78	75.87	1.41	75.87	12.65	0.17
RSA44326	Calmodulin-binding family protein	13.02	15.89	1.22	15.89	82.45	5.19
RSA44388	Fasciclin-like arabinogalactan protein 7	24.67	141.5	5.74	141.5	31.19	0.22
RSA44389	Unknown protein	3.5	22.53	6.43	22.53	8.05	0.36
RSA44414	Leucine-rich repeat receptor protein kinase EXS, putative	52.01	3.51	0.07	3.51	0.55	0.16
RSA44426	Universal stress family protein	3.62	61.14	16.89	61.14	16.46	0.27
RSA44446	3-dehydroquinate dehydratase/shikimate 5-dehydrogenase	53.83	1.6	0.03	1.6	7.25	4.54
RSA44490	Calmodulin 24-like protein	36.5	54.79	1.5	54.79	132.35	2.42
RSA44611	Plastid-lipid associated protein pap	34.17	34.34	1.01	34.34	6.04	0.18
RSA44612	Plastid-lipid associated protein pap	34.71	34.08	0.98	34.08	5.95	0.17
RSA44630	Caffeic acid 3-O-methyltransferase 1	15.12	4.8	0.32	4.8	16.78	3.49
RSA44631	O-methyltransferase-like protein	11.29	3.94	0.35	3.94	16.18	4.11
RSA44632	O-methyltransferase-like protein	15.91	4.66	0.29	4.66	16.32	3.5
RSA44633	O-methyltransferase-like protein	12.93	4.18	0.32	4.18	16.73	4
RSA44634	O-methyltransferase	0.13	3.64	28	3.64	25.12	6.9
RSA44665	Shikimate kinase	46.88	41.26	0.88	41.26	20.48	0.5
RSA44699	Geranylgeranyl reductase	58.47	49.97	0.85	49.97	18.6	0.37
RSA44700	Geranylgeranyl reductase	58.37	50.92	0.87	50.92	19.31	0.38
RSA44701	Geranylgeranyl reductase	60.94	53.16	0.87	53.16	20.41	0.38
RSA44702	Geranylgeranyl reductase	57.78	49.59	0.86	49.59	18.72	0.38
RSA44703	Unknown protein	91.32	84.5	0.93	84.5	30.91	0.37
RSA44770	Delta-9 desaturase	307.2	101.16	0.33	101.16	31.13	0.31
RSA44778	Flavonoid 3'-hydroxylase	117.27	133.87	1.14	133.87	43.29	0.32
RSA44779	Flavonoid 3'-hydroxylase	118.6	134.79	1.14	134.79	44.22	0.33
RSA44804	Laccase-like protein	57.3	42.98	0.75	42.98	4.29	0.1
RSA44828	Enolase, putative	55.22	20.38	0.37	20.38	8.18	0.4
RSA44829	Enolase, putative	69.47	27.44	0.39	27.44	9.23	0.34
RSA44839	Ethylene responsive transcription factor	16.05	5.89	0.37	5.89	36.98	6.28
RSA44844	Unknown protein	49.78	133.96	2.69	133.96	317.24	2.37
RSA44845	DCD (Development and Cell Death) domain protein	156.91	380.07	2.42	380.07	1029.12	2.71
RSA44846	Unknown protein	21.06	8.15	0.39	8.15	20.19	2.48
RSA44891	Pectin acetylesterase, putative	56.87	176.85	3.11	176.85	510.58	2.89
RSA44981	4-alpha-glucanotransferase	50.26	103.55	2.06	103.55	42.16	0.41
RSA44982	4-alpha-glucanotransferase	51.33	105.81	2.06	105.81	43.33	0.41
RSA45010	UDP-glycosyltransferase 1	34.12	29.57	0.87	29.57	12.65	0.43
RSA45014	Acyl carrier protein	583.17	162.83	0.28	162.83	76.87	0.47
RSA45026	Aux/IAA28-like	78.92	394.68	5	394.68	168.36	0.43
RSA45027	Aux/IAA28-like	83.91	411.14	4.9	411.14	173.63	0.42
RSA45028	Aux/IAA28-like	79.15	394.48	4.98	394.48	169.38	0.43
RSA45029	Aux/IAA28-like	85.33	416.25	4.88	416.25	177.08	0.43
RSA45030	Aux/IAA27-like	42.87	20.59	0.48	20.59	81.81	3.97
RSA45139	Cytochrome P450	499.41	634.81	1.27	634.81	1470.81	2.32
RSA45212	Unknown protein	16.13	23.19	1.44	23.19	8.67	0.37
RSA45222	Leucine-rich repeat family protein / extensin family protein	26.99	22.73	0.84	22.73	7.84	0.34
RSA45417	Unknown protein	0.98	1.38	1.41	1.38	23.55	17.07
RSA45427	Unknown protein	0.96	1.11	1.16	1.11	21.85	19.62
RSA45478	Tetraspanin family protein	7.94	8	1.01	8	3.12	0.39
RSA45533	Calcium homeostasis regulator CHoR1	26.78	26.53	0.99	26.53	9.06	0.34
RSA45534	Rhamnogalacturonate lyase	7.99	1.72	0.22	1.72	6.4	3.72
RSA45547	Unknown protein	4.9	10.95	2.23	10.95	2.04	0.19
RSA45614	Tropinone reductase, putative	18.56	15.4	0.83	15.4	59.15	3.84
RSA45617	Tropinone reductase, putative	17.22	15.37	0.89	15.37	56.77	3.69
RSA45618	Tropinone reductase, putative	15.83	14.5	0.92	14.5	52.09	3.59
RSA45620	Tropinone reductase, putative	12.57	11.64	0.93	11.64	42.62	3.66
RSA45623	Tropinone reductase, putative	2.54	3.09	1.21	3.09	18.14	5.87
RSA45628	Redox-regulatory protein FAM213A	2.76	17.13	6.21	17.13	6.52	0.38
RSA45707	1-aminocyclopropane-1-carboxylate oxidase	105.51	286.56	2.72	286.56	91.68	0.32
RSA45709	Cytochrome P450, putative	6.69	6.05	0.91	6.05	0.66	0.11
RSA45722	Unknown protein	521.09	119.57	0.23	119.57	36.32	0.3
RSA45723	Unknown protein	521.77	115.47	0.22	115.47	34.67	0.3
RSA45742	Nuclear protein	11.85	12.49	1.05	12.49	56.85	4.55
RSA45743	Nuclear protein	9.92	9.93	1	9.93	47.54	4.79
RSA45753	NAC domain protein	56.03	52.23	0.93	52.23	112.48	2.15
RSA45832	Retinol dehydrogenase	97.45	5.12	0.05	5.12	1.49	0.29
RSA45864	Unknown protein	3.07	21.65	7.06	21.65	70.76	3.27
RSA45869	Unknown protein	1.53	16.11	10.55	16.11	52.92	3.28
RSA45871	Unknown protein	1.42	9.61	6.78	9.61	35	3.64
RSA45872	Unknown protein	0	5.2	520	5.2	22.98	4.42
RSA45874	Unknown protein	0.72	13.36	18.56	13.36	48.99	3.67
RSA45875	Unknown protein	2.78	18.92	6.8	18.92	46.17	2.44
RSA45880	Unknown protein	0.61	16.38	27.01	16.38	64.56	3.94
RSA45881	Unknown protein	2.84	18.51	6.52	18.51	51.97	2.81
RSA45882	Unknown protein	3.27	15.77	4.83	15.77	59.52	3.77
RSA45883	Unknown protein	2.2	20.91	9.51	20.91	68.51	3.28
RSA45884	Unknown protein	1.65	15.21	9.2	15.21	45.74	3.01
RSA45889	Splicing factor U2af 38 kDa subunit	50.35	55.41	1.1	55.41	25.16	0.45
RSA45890	Splicing factor U2af 38 kDa subunit	50.98	55.88	1.1	55.88	25.49	0.46
RSA45917	MYB transcription factor	100.07	894.65	8.94	894.65	292.72	0.33
RSA45918	Unknown protein	16.77	130.36	7.77	130.36	43.82	0.34
RSA45951	18.2 kDa class I heat shock family protein	48.6	1099.52	22.62	1099.52	157.2	0.14
RSA46089	Glucan 1,3-beta-glucosidase	17.31	14.53	0.84	14.53	37.15	2.56
RSA46112	LOB domain-containing protein, putative	46.68	43.62	0.93	43.62	124.32	2.85
RSA46113	LOB domain-containing protein	48.15	52.54	1.09	52.54	138.44	2.64
RSA46156	Dof zinc finger protein 4	9.34	9.04	0.97	9.04	35.14	3.89
RSA46168	Geranylgeranyl diphosphate synthase	57.71	271.71	4.71	271.71	113.54	0.42
RSA46176	MATRIX METALLOproteinASE	1.62	11.51	7.09	11.51	28.37	2.47
RSA46177	MATRIX METALLOproteinASE	1.44	13.44	9.31	13.44	35.95	2.67
RSA46326	Unknown protein	1.84	7.93	4.31	7.93	1.87	0.24
RSA46379	Unknown protein	14.12	35.07	2.48	35.07	11.64	0.33
RSA46413	Ankyrin repeat family protein	9.52	9.96	1.05	9.96	22.37	2.25
RSA46414	Ankyrin repeat-containing protein, putative	8.16	8.07	0.99	8.07	17.46	2.16
RSA46424	Unknown protein	8.72	10.82	1.24	10.82	2.97	0.27
RSA46493	UDP-glycosyltransferase 1	41.66	43.46	1.04	43.46	11.61	0.27
RSA46494	UDP-glycosyltransferase 1	42.14	40.35	0.96	40.35	11.3	0.28
RSA46498	Unknown protein	0.57	11.09	19.34	11.09	3.06	0.28
RSA46499	Unknown protein	0.61	10.91	17.79	10.91	3.56	0.33
RSA46589	GRF1-INTERACTING FACTOR 2 family protein	38.32	30.19	0.79	30.19	61.79	2.05
RSA46590	GRF1-INTERACTING FACTOR 2 family protein	41.77	32.57	0.78	32.57	69.03	2.12
RSA46594	Mitochondrial carrier protein	17.25	79.5	4.61	79.5	285.22	3.59
RSA46605	Unknown protein	26.3	5.86	0.22	5.86	1.33	0.23
RSA46606	Unknown protein	22.24	4.39	0.2	4.39	0.99	0.23
RSA46627	Senescence-associated family protein	18.22	23.34	1.28	23.34	9.05	0.39
RSA46628	Tetraspanin-2	54.09	52.07	0.96	52.07	25.99	0.5
RSA46632	Nitrate transporter, putative	29.98	78.59	2.62	78.59	259.89	3.31
RSA46633	Nitrate transporter, putative	29.54	77.18	2.61	77.18	256.4	3.32
RSA46634	Nitrate transporter, putative	32.67	84.63	2.59	84.63	286.72	3.39
RSA46759	Receptor protein kinase, putative,expressed	0.77	23.59	30.64	23.59	3.27	0.14
RSA46760	Receptor protein kinase, putative,expressed	3.23	17.93	5.56	17.93	4.86	0.27
RSA46761	Receptor protein kinase, putative,expressed	3.16	18.33	5.79	18.33	4.98	0.27
RSA46762	Receptor protein kinase, putative,expressed	3.24	19.28	5.96	19.28	4.87	0.25
RSA46763	Receptor protein kinase, putative,expressed	0.76	21.78	28.78	21.78	2.95	0.14
RSA46764	Receptor protein kinase, putative,expressed	2.94	18.47	6.29	18.47	4.94	0.27
RSA46775	Pistil-specific extensin-like protein	995.16	460.65	0.46	460.65	133.09	0.29
RSA46801	auxin-responsive protein SAUR36	2.16	7.63	3.53	7.63	18.02	2.36
RSA46802	auxin-responsive protein SAUR36	2.36	11.11	4.7	11.11	26.6	2.4
RSA46863	Unknown protein	29.08	12.64	0.43	12.64	1.29	0.1
RSA46966	1-aminocyclopropane-1-carboxylate oxidase-1-like protein	8.12	8.86	1.09	8.86	22.45	2.53
RSA46967	1-aminocyclopropane-1-carboxylate oxidase-1-like protein	9.87	5.66	0.57	5.66	14.47	2.56	4.35	1.84	0.42
RSA46991	Unknown protein	6.06	6.26	1.03	6.26	26.13	4.18
RSA47008	Unknown protein	5.95	7.85	1.32	7.85	29.51	3.76
RSA47020	Expansin-like family protein	5.84	15.92	2.72	15.92	52.28	3.28
RSA47021	Expansin-like family protein	4.71	15.89	3.37	15.89	50.56	3.18
RSA47028	Homeobox-leucine zipper-like protein	102.23	95.65	0.94	95.65	215.52	2.25
RSA47035	Unknown protein	39.78	16.15	0.41	16.15	5.57	0.34
RSA47036	Unknown protein	39	14.65	0.38	14.65	4.59	0.31
RSA47048	Ethylene-responsive transcription factor	5.52	19.2	3.48	19.2	115.54	6.02	3.51	11.8	3.37
RSA47049	Ethylene-responsive transcription factor	5.83	20.02	3.43	20.02	120.49	6.02	3.56	11.98	3.36
RSA47050	Ethylene-responsive transcription factor	5.55	18.91	3.41	18.91	113.78	6.02	3.52	11.77	3.34
RSA47051	Ethylene-responsive transcription factor	6.4	21.18	3.31	21.18	121.91	5.76	3.84	12.1	3.15
RSA47052	Ethylene-responsive transcription factor	7.52	25.18	3.35	25.18	149.25	5.93	4.92	16.83	3.42
RSA47053	Auxin response factor 3 family protein	30.04	14.91	0.5	14.91	35.9	2.41
RSA47057	Unknown protein	12.49	43.7	3.5	43.7	587.74	13.45
RSA47090	15-cis-zeta-carotene isomerase, chloroplastic	53.1	120.14	2.26	120.14	22.82	0.19
RSA47130	Homeobox-leucine zipper family protein	162.93	383.62	2.35	383.62	130.03	0.34
RSA47193	Pollen Ole e 1 allergen and extensin family protein	5812.89	1266.42	0.22	1266.42	206.3	0.16
RSA47194	Dicer-like protein 4	9.96	7.66	0.77	7.66	18.18	2.37
RSA47203	BTB/POZ and TAZ domain-containing protein 2	85.42	22.64	0.27	22.64	9.06	0.4
RSA47231	GDSL esterase/lipase	22.07	7.27	0.33	7.27	19.42	2.67
RSA47258	Unknown protein	3.86	31.43	8.14	31.43	7	0.22
RSA47259	Unknown protein	9.01	41.24	4.58	41.24	11.07	0.27
RSA47260	Unknown protein	5.65	35.96	6.36	35.96	5.82	0.16
RSA47264	Unknown protein	8.65	38.96	4.51	38.96	10.09	0.26
RSA47310	Blue copper protein, putative	5.15	16.39	3.18	16.39	95.4	5.82
RSA47311	Blue copper protein, putative	8.53	32.01	3.75	32.01	108.02	3.37
RSA47312	Blue copper protein, putative	5.41	26.18	4.84	26.18	55.93	2.14
RSA47413	Aux/IAA26-like	8.76	5.37	0.61	5.37	19.73	3.67
RSA47426	Unknown protein	7.52	7.66	1.02	7.66	2.21	0.29
RSA47427	At5g37260-like protein	7.03	6.76	0.96	6.76	2.19	0.32
RSA47428	At5g37260-like protein	7.4	6.01	0.81	6.01	1.93	0.32
RSA47430	At5g37260-like protein	10.43	8.36	0.8	8.36	3.23	0.39
RSA47431	At5g37260-like protein	11.07	8.98	0.81	8.98	2.81	0.31
RSA47432	At5g37260-like protein	9.81	8.96	0.91	8.96	3.4	0.38
RSA47444	Cystathionine gamma-lyase	158.25	573.44	3.62	573.44	107.61	0.19
RSA47472	Ubiquitin ligase protein	21.09	30.84	1.46	30.84	78.61	2.55
RSA47473	Ubiquitin ligase protein	24.91	33.29	1.34	33.29	80.3	2.41
RSA47486	Receptor-like protein kinase	5.14	4.64	0.9	4.64	15.52	3.34
RSA47487	Receptor-like protein kinase	4.63	4.19	0.91	4.19	14.83	3.54
RSA47508	Dual specificity protein phosphatase, putative	20.3	25.11	1.24	25.11	12	0.48
RSA47509	Dual specificity protein phosphatase, putative	20.57	23.86	1.16	23.86	11.26	0.47
RSA47629	Thioredoxin	50.25	37.98	0.76	37.98	106.95	2.82
RSA47630	Glutathione transferase	7.13	16.55	2.32	16.55	39.98	2.42
RSA47631	Glutathione transferase	7.13	18.33	2.57	18.33	41.58	2.27
RSA47632	Glutathione transferase	7.6	20.56	2.71	20.56	46.01	2.24
RSA47651	GEM-like protein	7.46	25.89	3.47	25.89	62.03	2.4
RSA47652	GEM-like protein	6.2	21.44	3.46	21.44	51.19	2.39
RSA47653	GEM-like protein	5.45	19.3	3.54	19.3	45.65	2.37
RSA47654	GEM-like protein	6.17	21.64	3.51	21.64	49.5	2.29
RSA47655	GEM-like protein	6.41	23.1	3.6	23.1	55.16	2.39
RSA47656	GEM-like protein	5.97	21.8	3.65	21.8	51.25	2.35
RSA47657	GEM-like protein	6.09	21.28	3.49	21.28	48.99	2.3
RSA47658	GEM-like protein	6.38	21.3	3.34	21.3	52.17	2.45
RSA47659	GEM-like protein	6.06	22.54	3.72	22.54	52.8	2.34
RSA47660	GEM-like protein	6.95	24.13	3.47	24.13	58.36	2.42
RSA47661	GEM-like protein	5.38	18.99	3.53	18.99	45.21	2.38
RSA47662	GEM-like protein	6.95	24.62	3.54	24.62	56.32	2.29
RSA47663	GDSL esterase/lipase	911.86	203.21	0.22	203.21	29.84	0.15
RSA47703	GDSL esterase/lipase	1.24	1.75	1.42	1.75	14.85	8.47
RSA47761	Cytochrome P450	6.69	20.98	3.14	20.98	0.76	0.04
RSA47901	Unknown protein	2.2	29.15	13.27	29.15	9.52	0.33
RSA47905	Antiholin-like protein LrgB	19.49	27.73	1.42	27.73	13.91	0.5
RSA47949	Ankyrin repeat-containing protein, putative	2.95	8.4	2.85	8.4	20.04	2.39
RSA47952	Ankyrin repeat-containing protein, putative	2.85	8.1	2.84	8.1	18.46	2.28
RSA48047	C2 domain-containing family protein	33.4	3.51	0.1	3.51	1.15	0.33
RSA48048	C2 domain-containing family protein	34.37	3.75	0.11	3.75	1.24	0.33
RSA48049	C2 domain-containing family protein	28.27	4.28	0.15	4.28	0.77	0.18
RSA48050	C2 domain-containing family protein	32.24	3.41	0.11	3.41	1.13	0.33
RSA48207	Ring finger protein, putative	9.12	32.47	3.56	32.47	13.69	0.42
RSA48233	Unknown protein	38.39	92.72	2.42	92.72	39.47	0.43
RSA48234	Unknown protein	39.94	85.14	2.13	85.14	38.16	0.45
RSA48235	Unknown protein	32.2	74.06	2.3	74.06	32.87	0.44
RSA48236	Unknown protein	46.99	106.53	2.27	106.53	45.64	0.43
RSA48289	Vesicular glutamate transporter 2.1	8.73	23.45	2.69	23.45	8.55	0.36
RSA48290	Vesicular glutamate transporter 2.1	8.69	22.85	2.63	22.85	8.15	0.36
RSA48291	Vesicular glutamate transporter 2.1	8.06	21.72	2.69	21.72	7.99	0.37
RSA48292	Vesicular glutamate transporter 2.1	8.11	22.34	2.75	22.34	8.39	0.38
RSA48294	Expansin 3	492.9	412.88	0.84	412.88	24.81	0.06
RSA48297	Expansin 3	558.53	465.13	0.83	465.13	28.68	0.06
RSA48300	Expansin	417.43	477.17	1.14	477.17	123.65	0.26
RSA48324	1-aminocyclopropane-1-carboxylate oxidase homolog	5.02	12.84	2.56	12.84	33.55	2.61
RSA48340	Unknown protein	30.23	24.46	0.81	24.46	86.24	3.53
RSA48341	Homeobox-leucine zipper-like protein	14.5	11.38	0.78	11.38	38.13	3.35
RSA48342	CCAAT/enhancer-binding protein zeta	22.04	17.25	0.78	17.25	34.8	2.02
RSA48345	Ribosomal RNA small subunit methyltransferase NEP1	9.97	7.86	0.79	7.86	22.43	2.85
RSA48362	Receptor kinase	0.52	10.71	20.6	10.71	41.04	3.83
RSA48400	Beta-galactosidase	3.43	3.25	0.95	3.25	11.61	3.58
RSA48404	Beta-galactosidase	3.74	3.57	0.95	3.57	14.05	3.94
RSA48406	Beta-galactosidase	3.28	4.72	1.44	4.72	31.76	6.73
RSA48408	Beta-galactosidase	3.73	5.17	1.39	5.17	30.81	5.96
RSA48410	Beta-galactosidase	3.12	4.47	1.43	4.47	30.73	6.87
RSA48578	NAD dependent epimerase/dehydratase, putative	383	465.9	1.22	465.9	185.55	0.4
RSA48579	NAD dependent epimerase/dehydratase, putative	365.74	448.17	1.23	448.17	176.58	0.39
RSA48583	Leucine-rich repeat/extensin	120.09	15.99	0.13	15.99	5.42	0.34
RSA48584	Leucine-rich repeat/extensin	121.15	16.31	0.13	16.31	5.23	0.32
RSA48585	Leucine-rich repeat/extensin	119.91	16.25	0.14	16.25	5.75	0.35
RSA48586	Leucine-rich repeat/extensin	136.76	17.47	0.13	17.47	5.55	0.32
RSA48587	Leucine-rich repeat/extensin	120.91	17.48	0.14	17.48	5.94	0.34
RSA48611	Auxin efflux carrier	106.54	56.24	0.53	56.24	26.35	0.47
RSA48723	Unknown protein	16.5	119.1	7.22	119.1	44.73	0.38
RSA48736	Unknown protein	7.75	35.33	4.56	35.33	11.44	0.32
RSA48911	Pectate lyase 5 family protein	240.23	232.23	0.97	232.23	34.54	0.15
RSA48913	Pectate lyase	150.49	209.8	1.39	209.8	27.65	0.13
RSA48977	Receptor-like protein kinase	108.49	88.37	0.81	88.37	44.05	0.5
RSA49038	O-methyltransferase	84.35	14697.4	174.24	14697.4	1193.36	0.08
RSA49060	Receptor-like protein kinase	2.71	8.55	3.16	8.55	0	0
RSA49076	ERF/AP2 transcription factor family	197.32	91.68	0.46	91.68	36.56	0.4
RSA49097	Xyloglucan endotransglucosylase/hydrolase 6	0.92	13.63	14.76	13.63	120.89	8.87
RSA49100	Xyloglucan endotransglucosylase/hydrolase 6	0.84	11.86	14.18	11.86	108.39	9.14
RSA49102	Xyloglucan endotransglucosylase/hydrolase 6	0.35	8.21	23.25	8.21	55.08	6.71
RSA49182	Unknown protein	752.26	3220.16	4.28	3220.16	441.09	0.14
RSA49183	Unknown protein	594.58	2479.74	4.17	2479.74	336.97	0.14
RSA49196	Unknown protein	0	10.43	1042.67	10.43	38.58	3.7
RSA49197	Unknown protein	0	6.89	689	6.89	32.69	4.74
RSA49236	Unknown protein	34.85	30.4	0.87	30.4	11.73	0.39
RSA49237	Unknown protein	35.26	31.49	0.89	31.49	11.85	0.38
RSA49299	1-aminocyclopropane-1-carboxylate oxidase	83.25	159.31	1.91	159.31	441.53	2.77	17.88	18	1.01
RSA49300	1-aminocyclopropane-1-carboxylate oxidase	35.94	77.66	2.16	77.66	244.71	3.15
RSA49301	1-aminocyclopropane-1-carboxylate oxidase	48.3	99.42	2.06	99.42	298.16	3
RSA49302	1-aminocyclopropane-1-carboxylate oxidase	70.34	136.64	1.94	136.64	384.61	2.81	31.37	31.19	0.99
RSA49304	NifU-like protein 1, chloroplastic	46.69	204.98	4.39	204.98	59.97	0.29
RSA49310	NifU-like protein 1, chloroplastic	32.17	129.47	4.02	129.47	42.33	0.33
RSA49335	Transcription factor bHLH96	62.75	65.32	1.04	65.32	31.43	0.48
RSA49336	Transcription factor bHLH96	57.38	58.76	1.02	58.76	27.88	0.47
RSA49337	Transcription factor bHLH96	52.12	54.16	1.04	54.16	25.62	0.47
RSA49341	Unknown protein	9470.59	2535.19	0.27	2535.19	783.51	0.31
RSA49342	Unknown protein	9275.8	2660	0.29	2660	700.1	0.26
RSA49343	Unknown protein	10052	3264.18	0.32	3264.18	627.44	0.19
RSA49344	Unknown protein	8837.4	1972.54	0.22	1972.54	950.05	0.48
RSA49353	Protein PLANT CADMIUM RESISTANCE 2	3.44	16.93	4.92	16.93	36.09	2.13
RSA49359	Protein PLANT CADMIUM RESISTANCE 2	1.63	16.85	10.34	16.85	35.4	2.1
RSA49361	Protein PLANT CADMIUM RESISTANCE 3	2.77	11.57	4.18	11.57	30.1	2.6
RSA49364	Protein PLANT CADMIUM RESISTANCE 2	1.8	15.3	8.52	15.3	31.17	2.04
RSA49370	Protein PLANT CADMIUM RESISTANCE 2	2.1	15.84	7.54	15.84	32.44	2.05
RSA49371	Protein PLANT CADMIUM RESISTANCE 2	3.16	13.01	4.12	13.01	34.64	2.66
RSA49377	Protein PLANT CADMIUM RESISTANCE 2	2.42	16.8	6.95	16.8	34.2	2.04
RSA49381	Cell number regulator 2	5.84	15.25	2.61	15.25	58.71	3.85
RSA49383	Protein PLANT CADMIUM RESISTANCE 2	2.76	14.36	5.21	14.36	30.77	2.14
RSA49386	Protein PLANT CADMIUM RESISTANCE 2	0.33	5.45	16.34	5.45	17.19	3.16
RSA49391	Protein PLANT CADMIUM RESISTANCE 2	2.54	16.05	6.33	16.05	32.34	2.01
RSA49392	Protein PLANT CADMIUM RESISTANCE 2	1.59	17.31	10.91	17.31	36.71	2.12
RSA49393	Protein PLANT CADMIUM RESISTANCE 2	1.76	15	8.5	15	31.25	2.08
RSA49395	Protein PLANT CADMIUM RESISTANCE 2	1.6	16.48	10.32	16.48	35.12	2.13
RSA49399	Protein PLANT CADMIUM RESISTANCE 2	1.85	16.29	8.81	16.29	33.53	2.06
RSA49402	Protein PLANT CADMIUM RESISTANCE 2	3.03	15.49	5.11	15.49	32.21	2.08
RSA49404	Protein PLANT CADMIUM RESISTANCE 2	1.63	17.73	10.9	17.73	37.06	2.09
RSA49436	Unknown protein	39.19	34.1	0.87	34.1	0.25	0.01
RSA49485	RING zinc finger family protein	6.29	8.63	1.37	8.63	1.81	0.21
RSA49687	Ethylene responsive transcription factor 2b	50.3	3.93	0.08	3.93	10.15	2.58
RSA49689	Ethylene responsive transcription factor 2b	58.78	4.38	0.07	4.38	11.31	2.58
RSA49692	Heparanase, putative	20.83	42.39	2.03	42.39	10.84	0.26
RSA49763	Receptor-like protein kinase-like protein	22.25	30.22	1.36	30.22	8.56	0.28
RSA49778	PI-PLC X domain-containing protein	7.39	8.71	1.18	8.71	19.76	2.27
RSA49779	PI-PLC X domain-containing protein	7.92	9.27	1.17	9.27	20.13	2.17
RSA49964	Cytochrome P450	69.09	75.18	1.09	75.18	412.68	5.49
RSA50087	cDNA, clone: J075153F01, full insert sequence	6.1	14.42	2.36	14.42	6.95	0.48
RSA50094	Cytoplasmic dynein light chain, putative	6.64	9.27	1.4	9.27	33.09	3.57
RSA50152	Zinc transporter	14.07	13.55	0.96	13.55	29.15	2.15
RSA50153	Zinc transporter	14.24	13.96	0.98	13.96	29.69	2.13
RSA50185	Sec14 cytosolic factor	40.66	91.64	2.25	91.64	32.95	0.36
RSA50186	Sec14 cytosolic factor	34.11	80.41	2.36	80.41	30.4	0.38
RSA50187	Sec14 cytosolic factor	37.63	88.48	2.35	88.48	33.53	0.38
RSA50218	Unknown protein	16.03	22.37	1.4	22.37	45.23	2.02
RSA50271	Unknown protein	44.53	58.23	1.31	58.23	12.16	0.21
RSA50272	Unknown protein	63.25	65.57	1.04	65.57	19.72	0.3
RSA50273	Unknown protein	19.17	21.33	1.11	21.33	6.01	0.28
RSA50328	Nuclear transcription factor Y subunit A-3, putative	3.16	2.42	0.77	2.42	38.69	15.99
RSA50353	Unknown protein	1.07	10.72	10.05	10.72	43.37	4.05
RSA50354	Unknown protein	1.36	12.84	9.46	12.84	51.15	3.98
RSA50356	Unknown protein	1.22	12.04	9.84	12.04	46.91	3.9
RSA50358	Unknown protein	1.16	11.03	9.48	11.03	43.9	3.98
RSA50425	GDSL esterase/lipase	212.92	22.31	0.1	22.31	69.55	3.12
RSA50498	ABC transporter-like protein	6.82	18.91	2.77	18.91	9.1	0.48
RSA50499	ABC transporter-like protein	6.71	16.06	2.4	16.06	8.07	0.5
RSA50531	Two-component response regulator ARR14	13.63	12.41	0.91	12.41	28.81	2.32
RSA50532	Two-component response regulator ARR14	15.01	14.5	0.97	14.5	32.38	2.23
RSA50533	Myb family transcription factor	13.57	12.79	0.94	12.79	29.65	2.32
RSA50534	Myb family transcription factor	11.52	11.24	0.98	11.24	24.97	2.22
RSA50535	Two-component response regulator ARR14	14.48	13.99	0.97	13.99	30.82	2.2
RSA50575	GDSL esterase/lipase	30.86	7.1	0.23	7.1	1.79	0.25
RSA50576	GDSL esterase/lipase	31.4	6.87	0.22	6.87	1.79	0.26
RSA50636	Receptor-like kinase	3.61	13.21	3.65	13.21	29.6	2.24
RSA50637	Receptor-like kinase	3.81	14.46	3.8	14.46	32.23	2.23
RSA50639	Receptor-like kinase	6	13.29	2.21	13.29	27.15	2.04
RSA50646	Limonene synthase	169.7	228.35	1.35	228.35	74.55	0.33
RSA50651	UDP-glycosyltransferase 1	592.18	1270.82	2.15	1270.82	412.34	0.32
RSA50652	UDP-glycosyltransferase 1	645.9	1402.61	2.17	1402.61	461.84	0.33
RSA50653	UDP-glycosyltransferase 1	719.47	1560.61	2.17	1560.61	401.59	0.26
RSA50654	UDP-glycosyltransferase 1	593.98	1301.27	2.19	1301.27	316.93	0.24
RSA50700	Geranylgeranyl-diphosphate synthase	65.44	74.31	1.14	74.31	34.72	0.47
RSA50702	Phosphatase 2C family protein	9.02	27.37	3.04	27.37	9.25	0.34
RSA50717	Pectinesterase	0.12	3.25	26.32	3.25	69.62	21.44
RSA50726	Peptide deformylase-like	24.94	49.8	2	49.8	24.92	0.5
RSA50728	Vacuolar iron transporter	61.84	54.41	0.88	54.41	128.23	2.36
RSA50729	Vacuolar iron transporter	24.97	22.78	0.91	22.78	54.69	2.4
RSA50730	Vacuolar iron transporter	52.61	46.96	0.89	46.96	105.18	2.24
RSA50732	Vacuolar iron transporter	17.33	16.8	0.97	16.8	37.96	2.26
RSA50733	Vacuolar iron transporter	58.49	52.1	0.89	52.1	118.43	2.27
RSA50734	Vacuolar iron transporter	51.67	46.75	0.9	46.75	103.24	2.21
RSA50804	MACPF domain-containing protein	5.62	8.22	1.46	8.22	18.87	2.29
RSA50878	ABC1 family protein	25.4	73.37	2.89	73.37	13.1	0.18
RSA50936	DNA-binding protein-like	6.08	115.62	19.01	115.62	12.89	0.11
RSA50970	Ethylene-responsive transcription factor 7	2.66	5.21	1.96	5.21	58.45	11.22	7.93	8.15	1.03
RSA50996	Protein kinase	46.04	49.2	1.07	49.2	20.29	0.41
RSA50997	Nitrite reductase	8.89	7.67	0.86	7.67	33.5	4.37
RSA51061	Cysteine-rich receptor-like protein kinase 40	19.45	17.42	0.9	17.42	36.18	2.08
RSA51122	Receptor-like kinase	12.01	14.37	1.2	14.37	35.17	2.45
RSA51123	Receptor protein kinase, putative,expressed	12.47	17.74	1.42	17.74	43.84	2.47
RSA51125	Duf246 domain-containing protein	1.47	6.11	4.15	6.11	17.72	2.9
RSA51126	DUF246 domain-containing protein	1.28	4.72	3.68	4.72	14.48	3.07
RSA51127	DUF246 domain-containing protein	1.21	4.37	3.61	4.37	13.19	3.02
RSA51128	DUF246 domain-containing protein	1.56	6.53	4.18	6.53	18.87	2.89
RSA51140	Necrotic spotted lesions 1	4.72	10.62	2.25	10.62	22.09	2.08
RSA51232	Blue copper protein	7.62	146.67	19.25	146.67	845.72	5.77
RSA51233	Blue copper protein	9.19	143.02	15.57	143.02	759.7	5.31
RSA51234	Blue copper protein	10.46	146.24	13.98	146.24	749.05	5.12
RSA51235	Blue copper protein	8.21	151.38	18.43	151.38	861.33	5.69
RSA51274	DNA polymerase III polC-type	13.19	38.39	2.91	38.39	12.82	0.33
RSA51275	DNA polymerase III polC-type	11.86	33.16	2.8	33.16	11.2	0.34
RSA51276	DNA polymerase III polC-type	13.25	36.84	2.78	36.84	11.04	0.3
RSA51280	UDP-glycosyltransferase 1	43.23	133.67	3.09	133.67	34.21	0.26
RSA51282	UDP-glycosyltransferase 1	50.64	159.69	3.15	159.69	32.43	0.2
RSA51283	UDP-glycosyltransferase 1	45.13	138.99	3.08	138.99	35.78	0.26
RSA51327	LysM domain-containing receptor-like kinase	15.68	19.32	1.23	19.32	7.21	0.37
RSA51337	Ubiquinol oxidase	1.69	9.04	5.34	9.04	30.42	3.37
RSA51338	Ubiquinol oxidase	8.48	11.55	1.36	11.55	27.47	2.38
RSA51379	UDP-glycosyltransferase	31.2	35.8	1.15	35.8	76.42	2.13
RSA51383	UDP-glycosyltransferase 1	67.3	29.12	0.43	29.12	199.62	6.85
RSA51384	UDP-glycosyltransferase	57.78	28.06	0.49	28.06	170.27	6.07
RSA51418	ABC(ATP-binding) family transporter	11.52	26.38	2.29	26.38	10.67	0.4
RSA51419	ABC(ATP-binding) family transporter	10.96	26.82	2.45	26.82	10.97	0.41
RSA51420	ABC transporter I family member 20	8.49	21.46	2.53	21.46	9.2	0.43
RSA51421	ABC transporter I family member 20	9.37	22.67	2.42	22.67	9.82	0.43
RSA51424	Unknown protein	0	9.11	910.67	9.11	45.15	4.96
RSA51429	Unknown protein	0.3	14.13	47.64	14.13	53.52	3.79
RSA51434	Unknown protein	10.61	12.89	1.22	12.89	59.59	4.62
RSA51519	AT3g51510/F26O13_150	58.05	156.16	2.69	156.16	51.41	0.33
RSA51520	Unknown protein	343.91	387.37	1.13	387.37	905.3	2.34
RSA51521	Unknown protein	375.89	435.09	1.16	435.09	991.5	2.28
RSA51607	Transcription factor bHLH30	7.57	9.45	1.25	9.45	19.44	2.06
RSA51611	Heavy metal-associated domain containing protein, expressed	41.53	48.47	1.17	48.47	11.89	0.25
RSA51612	Heavy metal-associated domain containing protein, expressed	60.54	76.83	1.27	76.83	16.23	0.21
RSA51613	Heavy metal-associated domain containing protein, expressed	40.89	48.84	1.19	48.84	11.46	0.23
RSA51614	Heavy metal-associated domain containing protein, expressed	56.22	71.95	1.28	71.95	15.4	0.21
RSA51698	Sterol-C5(6)-desaturase homolog	37.36	44.79	1.2	44.79	21.15	0.47
RSA51699	Sterol-C5(6)-desaturase homolog	34.81	41.19	1.18	41.19	19.98	0.48
RSA51700	5-methyltetrahydropteroyltriglutamate--homocysteine methyltransferase, putative	844.03	946.74	1.12	946.74	477.78	0.5
RSA51711	Alpha/beta hydrolase related protein	0.6	3.58	5.93	3.58	11.26	3.15
RSA51713	Alpha/beta hydrolase related protein	0.22	3.19	14.27	3.19	9.18	2.88
RSA51768	CONSTANS-like zinc finger protein	17.94	13.93	0.78	13.93	27.95	2.01
RSA51769	CONSTANS-like zinc finger protein	18.82	14.39	0.76	14.39	29.42	2.04
RSA51797	Sucrose phosphate synthase 1f	93.16	117.21	1.26	117.21	57.64	0.49
RSA51866	Disease resistance protein	1.11	4.95	4.48	4.95	16.69	3.37
RSA52043	Protein translocase secy subunit, putative	12.69	17.43	1.37	17.43	8.47	0.49
RSA52089	Myosin heavy chain-like protein	10.83	9.07	0.84	9.07	2.25	0.25
RSA52090	Unknown protein	9.65	7.58	0.79	7.58	2.24	0.3
RSA52126	Nitrate transporter	24.95	24.14	0.97	24.14	72.92	3.02
RSA52239	Unknown protein	3.11	19.62	6.31	19.62	8.91	0.45
RSA52247	Mitochondrial uncoupling protein, putative	22.18	18.39	0.83	18.39	8.11	0.44
RSA52248	Mitochondrial uncoupling protein, putative	17.32	16.38	0.95	16.38	7.81	0.48
RSA52250	Mitochondrial uncoupling protein, putative	14.62	13.93	0.95	13.93	6.48	0.47
RSA52251	Mitochondrial uncoupling protein, putative	16	15.28	0.96	15.28	7.24	0.47
RSA52252	Sugar transporter, putative	8.17	9.2	1.13	9.2	18.89	2.05
RSA52257	Dual specificity protein phosphatase, putative	8.44	7.79	0.92	7.79	20.1	2.58
RSA52267	Glutamine synthetase	43.27	35.55	0.82	35.55	8.03	0.23
RSA52269	Galactokinase, putative	16.41	22.92	1.4	22.92	10.99	0.48
RSA52270	Galactokinase, putative	18.41	25.64	1.39	25.64	12.07	0.47
RSA52271	Galactokinase, putative	16.67	23.47	1.41	23.47	11.68	0.5
RSA52416	Unknown protein	0.79	0.65	0.82	0.65	7.65	11.77
RSA52506	Protodermal factor 1.3	22.78	25.92	1.14	25.92	6.32	0.24
RSA52507	Protodermal factor 1.3	20.75	22.07	1.06	22.07	5.72	0.26
RSA52508	Protodermal factor 1.3	21.89	23.1	1.05	23.1	6.32	0.27
RSA52509	Protodermal factor 1.3	24.86	27.01	1.09	27.01	6.88	0.25
RSA52588	Cycloartenol synthase, putative	33.28	84.78	2.55	84.78	300.79	3.55
RSA52591	Cation/H(+) antiporter 20	4.28	9.96	2.33	9.96	4.38	0.44
RSA52651	Flavonol synthase	268.57	68.32	0.25	68.32	19.88	0.29
RSA52652	Flavonol synthase	293.13	72.57	0.25	72.57	20.46	0.28
RSA52716	Unknown protein	103.21	51.92	0.5	51.92	103.62	2
RSA52747	Phosphoenolpyruvate carboxykinase [ATP], putative	93.58	23.84	0.25	23.84	47.88	2.01
RSA52783	Unknown protein	3.48	9.46	2.72	9.46	113.63	12.01
RSA52786	Unknown protein	20.34	18.78	0.92	18.78	84.7	4.51
RSA52790	Unknown protein	27.72	23.14	0.83	23.14	133.03	5.75
RSA52791	Unknown protein	3.93	4.87	1.24	4.87	85.31	17.5
RSA52793	Unknown protein	0.29	6.34	21.6	6.34	82.32	12.99
RSA52794	Unknown protein	3.52	10.65	3.02	10.65	116.62	10.95
RSA52795	Unknown protein	1.12	7.92	7.05	7.92	93.57	11.81
RSA52798	Unknown protein	1.6	7.18	4.49	7.18	101.79	14.18
RSA52799	Unknown protein	12.63	10.34	0.82	10.34	48.22	4.67
RSA52805	Unknown protein	21.08	18.7	0.89	18.7	63.35	3.39
RSA52807	Unknown protein	5.53	7.71	1.4	7.71	52.52	6.81
RSA52809	Unknown protein	10.54	11.68	1.11	11.68	72.88	6.24
RSA52813	Unknown protein	0.29	6.33	21.84	6.33	92.14	14.55
RSA52814	Unknown protein	0.68	7.56	11.18	7.56	104.24	13.78
RSA52817	Cytochrome P450, putative	45.1	61.73	1.37	61.73	146.35	2.37
RSA52858	Peptide transporter	4.06	5.18	1.28	5.18	11.17	2.16
RSA52861	XH/XS domain-containing family protein	8.58	6.74	0.79	6.74	14.51	2.15
RSA52875	Pectinesterase	244.18	311.79	1.28	311.79	124.83	0.4
RSA52969	Aux/IAA8-like	55.95	62.56	1.12	62.56	27.42	0.44
RSA53047	Receptor-like protein kinase	19.87	24.94	1.26	24.94	56.62	2.27
RSA53048	Receptor-like protein kinase	20.7	26.51	1.28	26.51	59.52	2.25
RSA53068	Interactor of constitutive active ROPs	8.94	12.74	1.43	12.74	4.48	0.35
RSA53072	Unknown protein	16.47	309.35	18.78	309.35	72.46	0.23
RSA53073	Unknown protein	5.71	100.15	17.54	100.15	8.03	0.08
RSA53074	Unknown protein	10.81	103.49	9.57	103.49	8.06	0.08
RSA53075	Unknown protein	4.95	84.32	17.04	84.32	7.09	0.08
RSA53076	Unknown protein	10.12	162.56	16.07	162.56	48.29	0.3
RSA53077	Epstein-Barr nuclear antigen, putative	9.78	144.23	14.75	144.23	40.26	0.28
RSA53078	Unknown protein	2.64	55.11	20.85	55.11	15.57	0.28
RSA53079	Unknown protein	13.39	73.77	5.51	73.77	19.99	0.27
RSA53080	Unknown protein	9.29	74.98	8.07	74.98	21.09	0.28
RSA53081	Unknown protein	7.91	63.11	7.98	63.11	12.51	0.2
RSA53082	Unknown protein	6.75	133.34	19.75	133.34	27.81	0.21
RSA53083	Unknown protein	13.85	74.74	5.39	74.74	20.44	0.27
RSA53084	Unknown protein	12.13	79.22	6.53	79.22	32.33	0.41
RSA53086	Unknown protein	36.81	840.6	22.84	840.6	56.39	0.07
RSA53087	Unknown protein	9.73	154.94	15.92	154.94	48.14	0.31
RSA53302	Lysine histidine transporter-like protein	4.78	20.8	4.35	20.8	107.02	5.15
RSA53341	3-beta hydroxysteroid dehydrogenase/isomerase family protein	61.11	249.96	4.09	249.96	48.44	0.19
RSA53342	Transferase, transferring glycosyl groups, putative	5.59	21.87	3.92	21.87	3.19	0.15
RSA53385	MLO-like protein	7.12	26.98	3.79	26.98	8.15	0.3
RSA53386	MLO-like protein	2.53	11.39	4.51	11.39	2.91	0.26
RSA53444	Unknown protein	57	44.62	0.78	44.62	14.61	0.33
RSA53445	Unknown protein	58	46.02	0.79	46.02	14.54	0.32
RSA53602	Triosephosphate isomerase	270.95	114.35	0.42	114.35	52.32	0.46
RSA53608	Endoglucanase 1	38.17	49.38	1.29	49.38	0.47	0.01
RSA53609	Endoglucanase 1	37.02	48.76	1.32	48.76	0.51	0.01
RSA53708	13S globulin seed storage protein 2	28.63	66.38	2.32	66.38	24.52	0.37
RSA53709	13S globulin seed storage protein 2	49.55	122.73	2.48	122.73	40.73	0.33
RSA53780	Branched-chain-amino-acid aminotransferase-like protein 2	40.59	39.48	0.97	39.48	19.53	0.49
RSA53781	Branched-chain-amino-acid aminotransferase-like protein 2	40.75	40.87	1	40.87	19.72	0.48
RSA53832	Unknown protein	9.52	3.64	0.38	3.64	13.69	3.76
RSA53833	WRKY transcription factor 31	4.42	5.45	1.23	5.45	16.52	3.03
RSA53834	WRKY transcription factor 23	4.42	6.35	1.44	6.35	18.61	2.93
RSA53836	WRKY transcription factor 31	3.36	4.02	1.2	4.02	15.01	3.74
RSA53844	CP12	131.94	134.69	1.02	134.69	313.51	2.33
RSA53877	Aldo/keto reductase, putative	27.25	27.6	1.01	27.6	11.32	0.41
RSA53879	Aldo/keto reductase, putative	35.49	48.72	1.37	48.72	17.78	0.36
RSA53880	Aldo/keto reductase, putative	21.62	30.77	1.42	30.77	12.01	0.39
RSA53888	rRNA/tRNA 2'-O-methyltransferase fibrillarin-like protein 1	48.87	47.45	0.97	47.45	98.55	2.08
RSA53889	rRNA/tRNA 2'-O-methyltransferase fibrillarin-like protein 1	47.92	46.92	0.98	46.92	96.63	2.06
RSA53894	Unknown protein	9.83	12.34	1.26	12.34	2.66	0.22
RSA53895	Unknown protein	34	45.35	1.33	45.35	4.82	0.11
RSA53896	Unknown protein	24.64	35.53	1.44	35.53	4.23	0.12
RSA53897	Syntaxin 31 family protein	69.33	71.96	1.04	71.96	34.3	0.48
RSA53928	Unknown protein	43.7	21.96	0.5	21.96	8.68	0.4
RSA54000	Trichohyalin like protein	4.81	4.2	0.87	4.2	11.91	2.83
RSA54022	DUF579 protein	75.94	24.88	0.33	24.88	68.01	2.73
RSA54025	DUF579 protein	23.49	6.06	0.26	6.06	18.32	3.02
RSA54029	DUF579 protein	78.05	25.43	0.33	25.43	69.16	2.72
RSA54041	Ethylene-responsive transcription factor 5	52.37	21.28	0.41	21.28	58.1	2.73
RSA54042	Ethylene-responsive transcription factor 3	71.04	24.69	0.35	24.69	74.96	3.04
RSA54070	Cycloartenol synthase	44.58	64.26	1.44	64.26	17.79	0.28
RSA54071	Cycloartenol synthase	54.58	71.53	1.31	71.53	17.3	0.24
RSA54072	Cycloartenol synthase	64.8	63.24	0.98	63.24	14.98	0.24
RSA54074	Cycloartenol synthase	53.38	54.57	1.02	54.57	13	0.24
RSA54075	Cycloartenol synthase	44.99	64.05	1.42	64.05	15.59	0.24
RSA54076	Cycloartenol synthase	53.88	59.59	1.11	59.59	15.6	0.26
RSA54077	Cycloartenol synthase	40.32	48.46	1.2	48.46	12.74	0.26
RSA54118	Non-specific lipid-transfer protein	157.37	895.09	5.69	895.09	377.95	0.42
RSA54119	Non-specific lipid-transfer protein	214.23	3392.21	15.83	3392.21	1662.71	0.49
RSA54120	Non-specific lipid-transfer protein	203.04	2716.3	13.38	2716.3	1315.07	0.48
RSA54121	Protein kinase, putative	26.79	33.27	1.24	33.27	77.81	2.34
RSA54122	Protein kinase, putative	25.96	31.29	1.21	31.29	70.21	2.24
RSA54123	Protein kinase, putative	24.62	30.56	1.24	30.56	70.03	2.29
RSA54124	Protein kinase, putative	27.08	33.59	1.24	33.59	78.61	2.34
RSA54131	2-C-methyl-D-erythritol 4-phosphate cytidylyltransferase	23.86	23.53	0.99	23.53	11.59	0.49
RSA54132	2-C-methyl-D-erythritol 4-phosphate cytidylyltransferase	26.07	24.7	0.95	24.7	12.45	0.5
RSA54218	Zinc transporter	31.77	24.05	0.76	24.05	73.79	3.07
RSA54219	Zinc transporter	31.21	23.92	0.77	23.92	74.21	3.1
RSA54220	Zinc transporter	32	24.92	0.78	24.92	78.27	3.14
RSA54221	Zinc transporter	31.46	24.4	0.78	24.4	75.89	3.11
RSA54223	Zinc transporter	30.15	23.55	0.78	23.55	71.95	3.06
RSA54297	ATP-dependent RNA helicase	16.63	16.03	0.96	16.03	33.54	2.09
RSA54300	ATP-dependent RNA helicase	17.18	16.71	0.97	16.71	34.26	2.05
RSA54301	ATP-dependent RNA helicase	16.84	16.44	0.98	16.44	33.84	2.06
RSA54302	ATP-dependent RNA helicase	16.23	15.63	0.96	15.63	32.88	2.1
RSA54316	Phosphoenolpyruvate carboxykinase [ATP], putative	47.49	35.71	0.75	35.71	86.92	2.43
RSA54472	WRKY transcription factor, putative	2.03	5.38	2.65	5.38	22.13	4.11
RSA54473	WRKY transcription factor 1	2.13	6.14	2.88	6.14	25.74	4.19
RSA54574	Unknown protein	25.48	24.85	0.98	24.85	12.06	0.49
RSA54764	Peptide transporter, putative	9.54	10.11	1.06	10.11	4.99	0.49
RSA54803	auxin-induced protein 15A-like	2.74	6.44	2.35	6.44	0.55	0.09
RSA54811	auxin-induced protein ARG7-like	1.87	5.13	2.74	5.13	0.46	0.09
RSA54813	auxin-induced protein 15A-like	3.5	5.26	1.51	5.26	0.54	0.1
RSA54814	auxin-induced protein 15A-like	3.75	6.04	1.61	6.04	0.69	0.11
RSA54828	Carboxypeptidase C-like	86.11	72.35	0.84	72.35	165.39	2.29
RSA54848	GATA transcription factor	22.59	75.24	3.33	75.24	8.5	0.11
RSA54978	Endo-1,3-1,4-beta-d-glucanase, putative	17.34	23.11	1.33	23.11	55.74	2.41
RSA54980	Endo-1,3-1,4-beta-d-glucanase, putative	12.53	15.35	1.23	15.35	38.78	2.53
RSA54982	Endo-1,3-1,4-beta-d-glucanase, putative	17.41	21.35	1.23	21.35	51.85	2.43
RSA54984	Endo-1,3-1,4-beta-d-glucanase, putative	15.64	19.44	1.24	19.44	43.99	2.26
RSA54986	Endo-1,3-1,4-beta-d-glucanase, putative	17.27	21.86	1.27	21.86	50.49	2.31
RSA55056	GMP synthase [glutamine-hydrolyzing] subunit A, putative	37.03	49.49	1.34	49.49	21.92	0.44
RSA55068	Peroxidase 25, putative	19.44	20.05	1.03	20.05	53.07	2.65
RSA55069	Phosphopantothenate-cysteine ligase	35.89	30.52	0.85	30.52	14.5	0.48
RSA55080	Glucose-1-phosphate adenylyltransferase	59.82	76.44	1.28	76.44	13.21	0.17
RSA55081	Glucose-1-phosphate adenylyltransferase	54.88	69.62	1.27	69.62	11.88	0.17
RSA55082	L-lactate dehydrogenase	14.02	14.63	1.04	14.63	38.25	2.61
RSA55084	L-lactate dehydrogenase	16.26	17.48	1.07	17.48	44.23	2.53
RSA55085	L-lactate dehydrogenase	10.95	10.76	0.98	10.76	28.9	2.69
RSA55086	L-lactate dehydrogenase	16.19	17.3	1.07	17.3	43.98	2.54
RSA55189	Transcription factor, putative	24.36	23.05	0.95	23.05	56.7	2.46
RSA55201	F28K20.6 protein	4.24	13.5	3.18	13.5	56.86	4.21
RSA55202	Gb|AAC79135.1	5.74	6.42	1.12	6.42	32.08	5
RSA55204	F28K20.6 protein	7.77	11.27	1.45	11.27	52.71	4.68
RSA55250	DNA-3-methyladenine glycosylase	54.19	183.82	3.39	183.82	85.64	0.47
RSA55269	Mitochondrial carrier protein, putative	14.59	17.45	1.2	17.45	8.33	0.48
RSA55317	Unknown protein	3.79	4.42	1.17	4.42	17.67	4
RSA55366	Cathepsin B-like cysteine proteinase	2.38	10.83	4.55	10.83	45.5	4.2
RSA55554	auxin-induced in root cultures protein 12-like	13.27	14.59	1.1	14.59	53.88	3.69
RSA55555	auxin-induced in root cultures protein 12-like	18.79	22.87	1.22	22.87	89.63	3.92
RSA55556	Auxin-induced in root cultures protein	4.58	4.34	0.95	4.34	21.93	5.05
RSA55611	S-adenosylmethionine-dependent methyltransferase, putative	8.55	28	3.28	28	55.95	2
RSA55616	S-adenosylmethionine-dependent methyltransferase, putative	10.29	13.28	1.29	13.28	61.72	4.65
RSA55617	S-adenosylmethionine-dependent methyltransferase, putative	12.03	27.29	2.27	27.29	65.74	2.41
RSA55620	S-adenosylmethionine-dependent methyltransferase, putative	10.6	28.36	2.68	28.36	72.61	2.56
RSA55621	S-adenosylmethionine-dependent methyltransferase, putative	6.51	22.76	3.5	22.76	54.2	2.38
RSA55623	S-adenosylmethionine-dependent methyltransferase, putative	9.71	25.54	2.63	25.54	58.09	2.27
RSA55681	Aspartic proteinase nepenthesin-2, putative	34.83	28.45	0.82	28.45	98.03	3.45
RSA55685	Aspartic proteinase nepenthesin-2, putative	8.36	11.11	1.33	11.11	87.78	7.9
RSA55687	Aspartic proteinase nepenthesin-2, putative	36.96	29.54	0.8	29.54	112.26	3.8
RSA55688	Aspartic proteinase nepenthesin-2, putative	29.51	24.89	0.84	24.89	99.85	4.01
RSA55690	Aspartic proteinase nepenthesin-2, putative	27.96	25.53	0.91	25.53	113.8	4.46
RSA55691	Aspartic proteinase nepenthesin-2, putative	26.59	22.03	0.83	22.03	80.85	3.67
RSA55733	Unknown protein	1.21	1.72	1.42	1.72	15.47	8.98
RSA55737	Unknown protein	1.24	1.83	1.48	1.83	15	8.2
RSA55738	Unknown protein	1.24	1.74	1.4	1.74	16.76	9.65
RSA55813	Acyl-CoA thioesterase, putative	12.69	25.96	2.05	25.96	12.43	0.48
RSA55816	Acyl-CoA thioesterase, putative	18.47	43.88	2.38	43.88	22.09	0.5
RSA55973	UDP-glycosyltransferase	447.82	93.47	0.21	93.47	22.42	0.24
RSA55974	UDP-glycosyltransferase	461.16	107.89	0.23	107.89	24.4	0.23
RSA55984	Oligopeptide transporter, putative	3.8	11.26	2.97	11.26	4.95	0.44
RSA56010	Unknown protein	42.91	45.76	1.07	45.76	19.13	0.42
RSA56013	Unknown protein	16.15	20.57	1.27	20.57	5.01	0.24
RSA56016	Unknown protein	33.65	31.03	0.92	31.03	10.8	0.35
RSA56022	Unknown protein	46.29	50.79	1.1	50.79	8.84	0.17
RSA56101	BTB/POZ domain-containing protein	10.89	36.68	3.37	36.68	16.81	0.46
RSA56102	BTB/POZ domain-containing protein	8.28	27.59	3.33	27.59	12.75	0.46
RSA56117	Preprotein translocase subunit SECE1	15.24	15.62	1.02	15.62	7.8	0.5
RSA56120	Preprotein translocase subunit SECE1	17.76	17.36	0.98	17.36	8.75	0.5
RSA56180	BTB/POZ domain-containing protein	6.15	26.78	4.36	26.78	9.49	0.35
RSA56243	Unknown protein	0.52	0.52	1.01	0.52	20.87	40.13
RSA56376	Lipoxygenase	2.72	37.56	13.79	37.56	9.2	0.24
RSA56377	Lipoxygenase	3.58	38.37	10.72	38.37	9.15	0.24
RSA56418	Receptor protein kinase, putative	56.98	52.24	0.92	52.24	13.59	0.26
RSA56429	Cytochrome P450, putative	74.73	4.46	0.06	4.46	1.02	0.23
RSA56443	Unknown protein	47.46	56.61	1.19	56.61	16.84	0.3
RSA56577	SnRK1-interacting protein 1	163.15	80.47	0.49	80.47	40.16	0.5
RSA56585	ATECP63, putative	24.32	28.08	1.15	28.08	70.68	2.52
RSA56586	ATECP63, putative	24.94	28.66	1.15	28.66	72.02	2.51
RSA56588	ATECP63, putative	27.29	29.52	1.08	29.52	74.28	2.52
RSA56589	ATECP63, putative	26.07	29.09	1.12	29.09	73.25	2.52
RSA56592	ATECP63, putative	25.33	29.12	1.15	29.12	73.1	2.51
RSA56647	Zinc finger protein CONSTANS-LIKE 1	34.36	32.74	0.95	32.74	16.26	0.5
RSA56696	Ankyrin repeat-containing protein, putative	5.18	4.16	0.8	4.16	12.05	2.9
RSA56945	Charged multivesicular body protein 3	7.41	5.98	0.81	5.98	16.12	2.7
RSA56947	Zinc finger protein CONSTANS-like protein	12.63	9.47	0.75	9.47	58.4	6.17
RSA56990	GTPase-activating protein GYP7	49.26	106.92	2.17	106.92	40.44	0.38
RSA56991	GTPase-activating protein GYP7	51.98	111.96	2.15	111.96	43.04	0.38
RSA57036	Protein ABIL1, putative	53.27	59.34	1.11	59.34	26.52	0.45
RSA57037	Protein ABIL1, putative	57.07	66.8	1.17	66.8	29.09	0.44
RSA57038	Protein ABIL1, putative	55.2	64.07	1.16	64.07	28.11	0.44
RSA57039	Protein ABIL1, putative	53.78	63.4	1.18	63.4	27.76	0.44
RSA57045	Auxin transporter-like protein	11.79	15.09	1.28	15.09	33.64	2.23
RSA57057	F-box protein GID2, putative	32.56	42.87	1.32	42.87	91.69	2.14
RSA57059	F-box protein GID2, putative	37.54	50.33	1.34	50.33	102.62	2.04
RSA57060	F-box protein GID2, putative	34.8	47.54	1.37	47.54	95.79	2.01
RSA57061	F-box protein GID2, putative	35.96	46.33	1.29	46.33	99.51	2.15
RSA57184	Senescence/dehydration-associated family protein	18.54	14.36	0.77	14.36	52.11	3.63
RSA57185	Senescence/dehydration-associated family protein	19.08	14.84	0.78	14.84	51.42	3.47
RSA57326	GCN5-related N-acetyltransferase family protein	6.37	12.73	2	12.73	6.43	0.5
RSA57337	Unknown protein	2.65	2.16	0.82	2.16	9.86	4.56
RSA57341	Unknown protein	2.68	2.31	0.86	2.31	9.18	3.98
RSA57445	Guanine nucleotide-binding protein G(I)/G(S)/G(T) subunit beta-1	13.31	13.22	0.99	13.22	34.41	2.6
RSA57446	Guanine nucleotide-binding protein G(I)/G(S)/G(T) subunit beta-1	11.95	12.38	1.04	12.38	34.54	2.79
RSA57447	DDB1- and CUL4-associated factor 11	10.27	11.88	1.16	11.88	33.95	2.86
RSA57448	DDB1- and CUL4-associated factor 11	14.24	12.36	0.87	12.36	30.67	2.48
RSA57496	Unknown protein	7.57	27.39	3.62	27.39	12.72	0.46
RSA57643	ER lumen protein retaining receptor	16.98	16.38	0.96	16.38	41.91	2.56
RSA57707	Unknown protein	6.32	47.92	7.58	47.92	16.25	0.34
RSA57708	Unknown protein	2.04	48.99	23.97	48.99	7.32	0.15
RSA57710	Unknown protein	4.97	53.88	10.83	53.88	14.67	0.27
RSA57711	Unknown protein	8.39	63.31	7.55	63.31	21.58	0.34
RSA57712	Unknown protein	5.66	54.98	9.71	54.98	17.6	0.32
RSA57713	Unknown protein	0.33	24.89	74.67	24.89	5.85	0.23
RSA57714	Unknown protein	6.36	59.09	9.29	59.09	20.14	0.34
RSA57716	Unknown protein	5.92	48.43	8.18	48.43	14.95	0.31
RSA57717	Unknown protein	9.06	52.67	5.81	52.67	18.34	0.35
RSA57757	LysM domain GPI-anchored protein 2, putative	55.01	64.94	1.18	64.94	186.41	2.87
RSA57758	LysM domain GPI-anchored protein 2, putative	56	56.16	1	56.16	165.29	2.94
RSA57759	LysM domain GPI-anchored protein 2, putative	54.06	53.11	0.98	53.11	166.46	3.13
RSA57845	Seed maturation protein PM23	53.74	109.38	2.04	109.38	38.94	0.36
RSA57846	Seed maturation protein PM23	61.27	128.15	2.09	128.15	40.42	0.32
RSA57848	Seed maturation protein PM23	56.98	114.22	2	114.22	37.67	0.33
RSA57849	Seed maturation protein PM23	62.8	130.31	2.08	130.31	41.35	0.32
RSA57851	Seed maturation protein PM23	52.73	107.31	2.04	107.31	38.08	0.35
RSA57880	Unknown protein	41.9	37.11	0.89	37.11	17.25	0.46
RSA57881	Unknown protein	34.22	30.1	0.88	30.1	14.67	0.49
RSA57889	Unknown protein	40.81	36.49	0.89	36.49	17.37	0.48
RSA57896	Unknown protein	46.26	40.58	0.88	40.58	19.01	0.47
RSA57897	Unknown protein	40.59	35.8	0.88	35.8	16.74	0.47
RSA57912	Enoyl-[acyl-carrier-protein] reductase [NADH]	35.44	27.92	0.79	27.92	12.87	0.46
RSA57927	1-aminocyclopropane-1-carboxylate deaminase	35.31	21.8	0.62	21.8	11.59	0.53	53.13	29.22	0.55
RSA57996	Mitochondrial uncoupling protein, putative	28.31	21.16	0.75	21.16	9.17	0.43
RSA57999	Mitochondrial uncoupling protein, putative	48.82	39.5	0.81	39.5	15.81	0.4
RSA58053	Glucose-1-phosphate adenylyltransferase	194.78	262.54	1.35	262.54	60.62	0.23
RSA58093	UDP-N-acetylglucosamine--N-acetylmuramyl-(Pentapeptide) pyrophosphoryl-undecaprenol N-acetylglucosamine transferase, putative	20.84	23.25	1.12	23.25	9.54	0.41
RSA58094	UDP-N-acetylglucosamine--N-acetylmuramyl-(Pentapeptide) pyrophosphoryl-undecaprenol N-acetylglucosamine transferase, putative	23.19	26.33	1.14	26.33	9.99	0.38
RSA58097	UDP-N-acetylglucosamine--N-acetylmuramyl-(Pentapeptide) pyrophosphoryl-undecaprenol N-acetylglucosamine transferase, putative	24.7	27.61	1.12	27.61	10.62	0.38
RSA58098	UDP-N-acetylglucosamine--N-acetylmuramyl-(Pentapeptide) pyrophosphoryl-undecaprenol N-acetylglucosamine transferase, putative	27.17	31.04	1.14	31.04	10.94	0.35
RSA58099	UDP-N-acetylglucosamine--N-acetylmuramyl-(Pentapeptide) pyrophosphoryl-undecaprenol N-acetylglucosamine transferase, putative	23.42	26.02	1.11	26.02	10.56	0.41
RSA58100	UDP-N-acetylglucosamine--N-acetylmuramyl-(Pentapeptide) pyrophosphoryl-undecaprenol N-acetylglucosamine transferase, putative	22.22	25.31	1.14	25.31	9.63	0.38
RSA58101	UDP-N-acetylglucosamine--N-acetylmuramyl-(Pentapeptide) pyrophosphoryl-undecaprenol N-acetylglucosamine transferase, putative	21.66	24.47	1.13	24.47	9.6	0.39
RSA58102	UDP-N-acetylglucosamine--N-acetylmuramyl-(Pentapeptide) pyrophosphoryl-undecaprenol N-acetylglucosamine transferase, putative	24.78	27.83	1.12	27.83	10.52	0.38
RSA58103	UDP-N-acetylglucosamine--N-acetylmuramyl-(Pentapeptide) pyrophosphoryl-undecaprenol N-acetylglucosamine transferase, putative	27.64	31.26	1.13	31.26	11.01	0.35
RSA58104	UDP-N-acetylglucosamine--N-acetylmuramyl-(Pentapeptide) pyrophosphoryl-undecaprenol N-acetylglucosamine transferase, putative	26.57	30.46	1.15	30.46	10.7	0.35
RSA58111	Loricrin-like protein	27.74	36.79	1.33	36.79	101.69	2.76
RSA58204	Monoglyceride lipase	6.68	18.22	2.73	18.22	36.36	2
RSA58283	Receptor-like kinase	1.72	1.51	0.88	1.51	6.17	4.08
RSA58284	Receptor-like kinase	1.75	1.68	0.96	1.68	7.1	4.23
RSA58396	MuDRA transposase-like	11.84	9.17	0.77	9.17	44.68	4.87
RSA58398	Unknown protein	9.27	8.24	0.89	8.24	26.01	3.16
RSA58405	MuDRA transposase-like	9.74	8.07	0.83	8.07	40.21	4.98
RSA58407	Unknown protein	5.95	5.51	0.93	5.51	22.56	4.09
RSA58408	Unknown protein	9.05	7.73	0.85	7.73	37.09	4.8
RSA58410	MuDRA transposase-like	12.38	9.64	0.78	9.64	41.65	4.32
RSA58412	MuDRA transposase-like	10.39	8.64	0.83	8.64	38.7	4.48
RSA58413	Coatomer delta subunit, putative	34.84	30.57	0.88	30.57	88.67	2.9
RSA58414	MuDRA transposase-like	9.8	8.24	0.84	8.24	35.96	4.36
RSA58416	F26F24.11	12.12	13.54	1.12	13.54	44.13	3.26
RSA58417	F26F24.11	13.1	12.85	0.98	12.85	44.34	3.45
RSA58459	Calcium-transporting ATPase 13, plasma membrane-type, putative, expressed	0.37	0.53	1.45	0.53	8.37	15.8
RSA58482	Unknown protein	2.89	3.18	1.1	3.18	20.83	6.56
RSA58540	Unknown protein	44.58	55.78	1.25	55.78	168.73	3.02
RSA58549	Aquaporin	36.32	47.98	1.32	47.98	138.2	2.88
RSA58557	Heavy-metal-associated domain-containing protein	36.18	72.71	2.01	72.71	227.45	3.13
RSA58560	Protein WAX2	19.83	60.91	3.07	60.91	135.06	2.22
RSA58561	Protein WAX2	18.64	58.29	3.13	58.29	132.3	2.27
RSA58610	auxin-induced protein 22D-like	1.13	37.04	32.69	37.04	6.43	0.17
RSA58667	Aldehyde dehydrogenase	12.02	10.69	0.89	10.69	23	2.15
RSA58668	Aldehyde dehydrogenase	19.4	14.95	0.77	14.95	35.96	2.41
RSA58934	Unknown protein	2.22	167.15	75.18	167.15	60.78	0.36
RSA59001	Hydroxymethylglutaryl-CoA synthase	128.35	111.03	0.87	111.03	255.18	2.3
RSA59002	Hydroxymethylglutaryl-CoA synthase	137.91	117.9	0.85	117.9	277.7	2.36
RSA59090	Ternary complex factor MIP1-like	28.65	13.36	0.47	13.36	5.87	0.44
RSA59096	Tetratricopeptide repeat-containing family protein	46.6	34.84	0.75	34.84	16.21	0.47
RSA59183	Dehydrin 3	83.3	80.42	0.97	80.42	18	0.22
RSA59184	Unknown protein	52.75	44.28	0.84	44.28	7.57	0.17
RSA59185	Dehydrin 3	70.46	69.5	0.99	69.5	15.62	0.22
RSA59186	Unknown protein	13.83	14.03	1.01	14.03	2.34	0.17
RSA59187	F26K24.10 protein	33.62	38.98	1.16	38.98	88.67	2.27
RSA59188	F26K24.10 protein	15.94	16.98	1.07	16.98	70.84	4.17
RSA59189	F26K24.10 protein	18.58	18.35	0.99	18.35	38.08	2.08
RSA59196	WRKY transcription factor 08	4.62	13.61	2.95	13.61	49.17	3.61
RSA59197	WRKY transcription factor 08	4.87	14.33	2.94	14.33	50.15	3.5
RSA59198	WRKY family transcription factor family protein	4.47	13.96	3.12	13.96	49.78	3.57
RSA59199	WRKY family transcription factor family protein	5.19	15.48	2.98	15.48	53.33	3.45
RSA59272	Cytochrome P450, putative	27.6	29.51	1.07	29.51	8.56	0.29
RSA59279	Cytochrome P450, putative	19.5	20	1.03	20	6.75	0.34
RSA59355	Phosphoglycerate mutase, putative	31.8	35.63	1.12	35.63	13.43	0.38
RSA59356	Phosphoglycerate mutase, putative	28.26	32.97	1.17	32.97	12.8	0.39
RSA59357	Phosphoglycerate mutase, putative	31.56	35.19	1.12	35.19	13.54	0.38
RSA59358	Phosphoglycerate mutase, putative	27.59	32.37	1.17	32.37	12.65	0.39
RSA59359	Mid1-complementing activity 2	63.37	31.58	0.5	31.58	10.52	0.33
RSA59406	Reticuline oxidase-like protein	8.55	24.91	2.91	24.91	62	2.49
RSA59408	Reticuline oxidase-like protein	10.04	29.01	2.89	29.01	78.84	2.72
RSA59426	AT3G55350-like protein	5.34	7.26	1.36	7.26	20.53	2.83
RSA59427	AT3G55350-like protein	4.78	6.76	1.41	6.76	18.32	2.71
RSA59437	Nicotinate-nucleotide pyrophosphorylase [carboxylating], putative	38.54	40.04	1.04	40.04	13.21	0.33
RSA59459	Unknown protein	2.85	15.02	5.27	15.02	3.65	0.24
RSA59467	Ammonium transporter 1 member	25.78	95.63	3.71	95.63	284.22	2.97
RSA59468	Ammonium transporter, putative	22.6	82.16	3.64	82.16	232.33	2.83
RSA59469	Ammonium transporter, putative	21.47	79.82	3.72	79.82	225.85	2.83
RSA59482	Receptor protein kinase, putative	16.86	14.29	0.85	14.29	43.53	3.05
RSA59483	1-aminocyclopropane-1-carboxylate oxidase	51.97	237.08	4.56	237.08	90.62	0.38
RSA59495	Glycerol-3-phosphate acyltransferase 6	514.18	180.99	0.35	180.99	34.2	0.19
RSA59497	Glycerol-3-phosphate acyltransferase 6	538.95	188.18	0.35	188.18	35.11	0.19
RSA59498	Glycerol-3-phosphate acyltransferase 6	506.18	175.62	0.35	175.62	34.06	0.19
RSA59499	Glycerol-3-phosphate acyltransferase 6	517.32	178.4	0.34	178.4	33.25	0.19
RSA59500	Glycerol-3-phosphate acyltransferase 6	496.69	171.17	0.34	171.17	32.8	0.19
RSA59501	Glycerol-3-phosphate acyltransferase 6	499.73	177.47	0.36	177.47	35.26	0.2
RSA59502	Glycerol-3-phosphate acyltransferase 6	517.26	180.34	0.35	180.34	33.79	0.19
RSA59503	Glycerol-3-phosphate acyltransferase 6	511.92	181.32	0.35	181.32	35.72	0.2
RSA59554	Transcription factor bHLH	97.74	267.75	2.74	267.75	92.48	0.35
RSA59555	Transcription factor bHLH	88.22	251.65	2.85	251.65	86.46	0.34
RSA59558	Transcription factor bHLH	74.96	206.32	2.75	206.32	72.36	0.35
RSA59559	Transcription factor bHLH	67.57	193.68	2.87	193.68	67.65	0.35
RSA59630	Alpha/beta hydrolase, putative	40.37	12.11	0.3	12.11	4.61	0.38
RSA59641	Squalene monooxygenase, putative, expressed	47.39	40.57	0.86	40.57	87.81	2.16
RSA59686	Leucine-rich repeat receptor protein kinase EXS, putative	2.65	6.52	2.46	6.52	14.41	2.21
RSA59690	Zinc finger protein	36.61	35.62	0.97	35.62	75.09	2.11
RSA59699	Mitochondrial chaperone BCS1	26.18	7.93	0.3	7.93	39.98	5.04
RSA59700	Mitochondrial chaperone BCS1	27.32	8.02	0.29	8.02	39.34	4.9
RSA59704	Mitochondrial chaperone BCS1, putative	29.76	7.02	0.24	7.02	38.32	5.46
RSA59705	Mitochondrial chaperone BCS1, putative	26.94	6.65	0.25	6.65	37.14	5.59
RSA59706	Mitochondrial chaperone BCS1, putative	30.2	7.23	0.24	7.23	39.29	5.44
RSA59709	Mitochondrial chaperone BCS1	25.9	7.88	0.3	7.88	39.68	5.03
RSA59712	Mitochondrial chaperone BCS1, putative	27.37	6.87	0.25	6.87	38.06	5.54
RSA59715	Mitochondrial chaperone BCS1	24.61	9.74	0.4	9.74	37.33	3.83
RSA59719	Mitochondrial chaperone BCS1	17.48	8.32	0.48	8.32	33.7	4.05
RSA59737	F-box/kelch-repeat protein	3.11	9.65	3.1	9.65	3.54	0.37
RSA59796	F-box/kelch-repeat protein	7.82	10.87	1.39	10.87	4.96	0.46
RSA59861	NADH dehydrogenase, putative	15.1	21.86	1.45	21.86	4.89	0.22
RSA59915	Disease resistance family protein	5.05	4.74	0.94	4.74	18.05	3.81
RSA60031	Long-chain-alcohol oxidase	216.75	199.69	0.92	199.69	15.58	0.08
RSA60094	UDP-glycosyltransferase 1	51.28	48.88	0.95	48.88	24.45	0.5
RSA60095	UDP-glycosyltransferase 1	50.33	47.78	0.95	47.78	23.74	0.5
RSA60097	UDP-glycosyltransferase-like protein	17.02	50.45	2.96	50.45	132.81	2.63
RSA60120	2-methyl-6-phytylbenzoquinone methyltransferase	145.67	65.95	0.45	65.95	32.31	0.49
RSA60121	2-methyl-6-phytylbenzoquinone methyltransferase	153.05	70.78	0.46	70.78	32.97	0.47
RSA60357	Receptor-like protein kinase	7.15	6.76	0.95	6.76	31.88	4.72
RSA60358	Receptor-like protein kinase	5.08	5.62	1.11	5.62	27.89	4.96
RSA60359	Receptor-like protein kinase	5.6	6.68	1.19	6.68	33.39	5
RSA60360	Receptor-like protein kinase	5.29	6.1	1.15	6.1	31.12	5.1
RSA60361	Receptor-like protein kinase	7.99	7.47	0.94	7.47	34.37	4.6
RSA60535	bHLH family protein BIM1	24.4	23.37	0.96	23.37	11.29	0.48
RSA60536	bHLH family protein BIM1	24.31	23.34	0.96	23.34	11.45	0.49
RSA60657	Protein WAX2	797.67	972.08	1.22	972.08	172.95	0.18
RSA60658	Protein WAX2	592.73	669.64	1.13	669.64	158.71	0.24
RSA60659	Protein WAX2	573.99	643.47	1.12	643.47	256.74	0.4
RSA60660	Protein WAX2	714.53	890.3	1.25	890.3	97.15	0.11
RSA60661	Protein WAX2	814.16	991.17	1.22	991.17	187.96	0.19
RSA60662	Protein WAX2	636.5	758.28	1.19	758.28	365.03	0.48
RSA60663	Protein WAX2	926.23	1169.42	1.26	1169.42	153.14	0.13
RSA60664	Protein WAX2	739	921.25	1.25	921.25	126.2	0.14
RSA60666	Protein WAX2	381.2	462	1.21	462	28.98	0.06
RSA60668	Protein WAX2	909.15	1159.51	1.28	1159.51	70.79	0.06
RSA60670	Protein WAX2	641.47	787.46	1.23	787.46	135.14	0.17
RSA60671	Protein WAX2	822.06	1003.68	1.22	1003.68	192.77	0.19
RSA60672	Protein WAX2	898.54	1134.5	1.26	1134.5	118.55	0.1
RSA60673	Protein WAX2	448.45	474.12	1.06	474.12	116.94	0.25
RSA60674	Protein WAX2	715.16	895.49	1.25	895.49	100.56	0.11
RSA60675	Protein WAX2	603.55	702.95	1.16	702.95	296.33	0.42
RSA60754	Phytoene desaturase protein	29.53	43.53	1.47	43.53	14.85	0.34
RSA60773	Leucine-rich repeat receptor-like protein	1893.39	4010.23	2.12	4010.23	1511.53	0.38
RSA60794	High affinity nitrate transporter	13.12	12.11	0.92	12.11	55.64	4.6
RSA60962	NB-ARC domain containing protein, expressed	12.36	13.26	1.07	13.26	29.63	2.23
RSA61095	At1g56580/F25P12_18	166.91	198.38	1.19	198.38	84.29	0.42
RSA61435	Argonaute family protein	28.53	9.87	0.35	9.87	23.65	2.4
RSA61459	Receptor protein kinase, putative	22	30.72	1.4	30.72	68.85	2.24
RSA61462	Receptor protein kinase, putative	22	30.69	1.4	30.69	68.66	2.24
RSA61475	Unknown protein	7.33	7.14	0.97	7.14	2.28	0.32
RSA61482	Unknown protein	9.44	10.32	1.09	10.32	2.1	0.2
RSA61582	Unknown protein	6.87	37.52	5.46	37.52	10.12	0.27
RSA61583	Unknown protein	8.79	33.71	3.84	33.71	12.57	0.37
RSA61584	Unknown protein	8.44	33.23	3.94	33.23	10.87	0.33
RSA61585	Unknown protein	7.01	34.8	4.97	34.8	10.26	0.29
RSA61586	Unknown protein	8.5	31.93	3.76	31.93	9.35	0.29
RSA61587	Unknown protein	8.27	31.89	3.86	31.89	9.34	0.29
RSA61588	Unknown protein	10.29	33.48	3.25	33.48	8.79	0.26
RSA61589	Unknown protein	8.76	31.33	3.58	31.33	12.39	0.4
RSA61590	Unknown protein	8.15	30.4	3.73	30.4	10.41	0.34
RSA61591	Unknown protein	6.12	29.18	4.77	29.18	6.8	0.23
RSA61592	Unknown protein	6.74	32.26	4.78	32.26	13.05	0.4
RSA61593	Unknown protein	7.66	29.05	3.79	29.05	8.49	0.29
RSA61594	Unknown protein	7.97	33.17	4.16	33.17	7.56	0.23
RSA61595	Unknown protein	6.47	34.31	5.31	34.31	9.07	0.26
RSA61600	Phosphoenolpyruvate carboxylase, putative	73.42	147.62	2.01	147.62	70.82	0.48
RSA61601	Phosphoenolpyruvate carboxylase, putative	75.02	151.58	2.02	151.58	73.9	0.49
RSA61603	Cation/H(+) antiporter 19	4.74	11.33	2.39	11.33	4.67	0.41
RSA61604	Alpha-mannosidase	19.01	7.34	0.39	7.34	23.72	3.23
RSA61605	Alpha-mannosidase	11.5	4.94	0.43	4.94	12.01	2.43
RSA61627	Unknown protein	39.76	15.58	0.39	15.58	40.14	2.58
RSA61628	Cinnamate-4-hydroxylase	228.82	27.57	0.12	27.57	64.5	2.34
RSA61642	Beta-glucosidase	13.87	10.89	0.78	10.89	26.38	2.42
RSA61647	Chalcone synthase	395.68	400.22	1.01	400.22	145.16	0.36
RSA61648	Chalcone synthase	518.58	528.56	1.02	528.56	178.28	0.34
RSA61649	Chalcone synthase	310.44	311.77	1	311.77	140.32	0.45
RSA61690	BTB/POZ domain-containing protein	3.41	14.18	4.16	14.18	5.72	0.4
RSA61701	Sugar transporter, putative	18.77	20.2	1.08	20.2	72.37	3.58
RSA61703	Monocopper oxidase family protein	6.1	5.75	0.94	5.75	16.08	2.8
RSA61704	Monocopper oxidase family protein	5.48	5.12	0.93	5.12	14.05	2.74
RSA61705	Monocopper oxidase family protein	4.32	4.32	1	4.32	11.77	2.72
RSA61706	Monocopper oxidase family protein	4.26	4.15	0.97	4.15	11.02	2.66
RSA61850	Dynamin, putative	27.11	39.2	1.45	39.2	18.32	0.47
RSA61851	Dynamin, putative	26.76	36.64	1.37	36.64	17.74	0.48
RSA61862	SCARECROW-LIKE 1 family protein	16.54	15.01	0.91	15.01	37.08	2.47
RSA61863	SCARECROW-LIKE 1 family protein	15.92	15	0.94	15	36.16	2.41
RSA61864	SCARECROW-LIKE 1 family protein	15.93	14.61	0.92	14.61	36.23	2.48
RSA61865	SCARECROW-LIKE 1 family protein	16.88	15.45	0.92	15.45	37.61	2.43
RSA61866	SCARECROW-LIKE 1 family protein	16.48	15.17	0.92	15.17	36.86	2.43
RSA61867	SCARECROW-LIKE 1 family protein	15.83	14.5	0.92	14.5	35.81	2.47
RSA62009	Aldo/keto reductase family protein	39.78	33.9	0.85	33.9	80.17	2.37
RSA62010	Aldo/keto reductase family protein	50.85	43.13	0.85	43.13	96.46	2.24
RSA62011	Aldo/keto reductase, putative	42.78	34.96	0.82	34.96	73.59	2.11
RSA62012	Aldo/keto reductase, putative	18.01	17.35	0.96	17.35	39.51	2.28
RSA62013	Aldo/keto reductase family protein	44.23	37.74	0.85	37.74	87.3	2.31
RSA62014	Aldo/keto reductase	21.16	16.13	0.76	16.13	38.17	2.37
RSA62015	Aldo/keto reductase family protein	44.37	38.71	0.87	38.71	92.23	2.38
RSA62024	3-ketoacyl-CoA synthase	7.73	10.46	1.35	10.46	4.63	0.44
RSA62083	GCIP-interacting family protein	2.2	3.29	1.49	3.29	11.22	3.41
RSA62084	Unknown protein	7.92	11.73	1.48	11.73	28.77	2.45
[truncated: 595 more rows]
